# Supplementary material
Source: publisher figshare collection journal article supplement (https://tandf.figshare.com/ndownloader/files/13083305)
Supplement: Supplementary file 1 [file 13083305]

**Supporting Information**

**Facile and rapid synthesis of piperidinium-6-amino-4-aryl-3,5-dicyano-1,4-dihydropyridine-2-thiolate**

Fahimeh Sadat Hosseinia, Mohammad Bayat*a, Milad Masoumi a

*a Chemistry Department, Imam Khomeini International University, Qazvin, Iran*

*Tel: +98 (28)33780040; Fax: +98 (28)33780040; E-mail: bayat_mo@yahoo.com; m.bayat@sci.ikiu.ac.ir*

**The Table of Contents**

| **Title** | **Page** |
| --- | --- |
| Title, author’s name, address and table of contents | 1 |
| General information | 1 |
| Fig 1. Structure of all products **4** | 2 |
| 1H and 13C NMR and IR and Mass spectrums of **4a** | 3-6 |
| 1H and 13C NMR and IR and Mass spectrums of **4b** | 7-10 |
| 1H and 13C NMR and IR and Mass spectrums of **4c** | 11-14 |
| 1H and 13C NMR and IR and Mass spectrums of **4d** | 15-18 |
| 1H and 13C NMR and IR and Mass spectrums of **4e** | 19-22 |
| 1H and 13C NMR and IR and Mass spectrums of **4f** | 23-26 |
| 1H and 13C NMR and IR and Mass spectrums of **4g** | 27-30 |
| 1H and 13C NMR and IR and Mass spectrums of **4h** | 31-34 |
| 1H and 13C NMR and IR and Mass spectrums of **4i** | 35-38 |
| 1H and 13C NMR and Mass spectrums of **4j** | 39-41 |

**General information:**

The cyanothioacetamide, aromatic aldehydes, piperidine and solvents were obtained from Merck and Aldrich and were used without further purification. NMR spectra were recorded with a Bruker DRX-300 Avance instrument (300 MHz for 1H and 75.4 MHz for 13C) with DMSO-*d*6 as solvent. Chemical shifts are given in ppm (**), and coupling constant (*J*) are reported in hertz (Hz). Melting points were measured with an electrotherma1 9100 apparatus. Mass spectra were recorded with an Agilent 5975C VL MSD with Triple-Axis Detector operating at an ionization potential of 70 eV. IR spectra were measured with, Bruker Tensor 27 spectrometer. Elemental analyses for C, H and N were performed using a PerkinElmer 2004 series [II] CHN elemental analyzer.

The structures all of the products **4a-j** (Figure 1) were deduced from their IR, Mass, 1H NMR, and 13C NMR spectra.

**Fig 1**. Structure of all products **4a-j**.

**
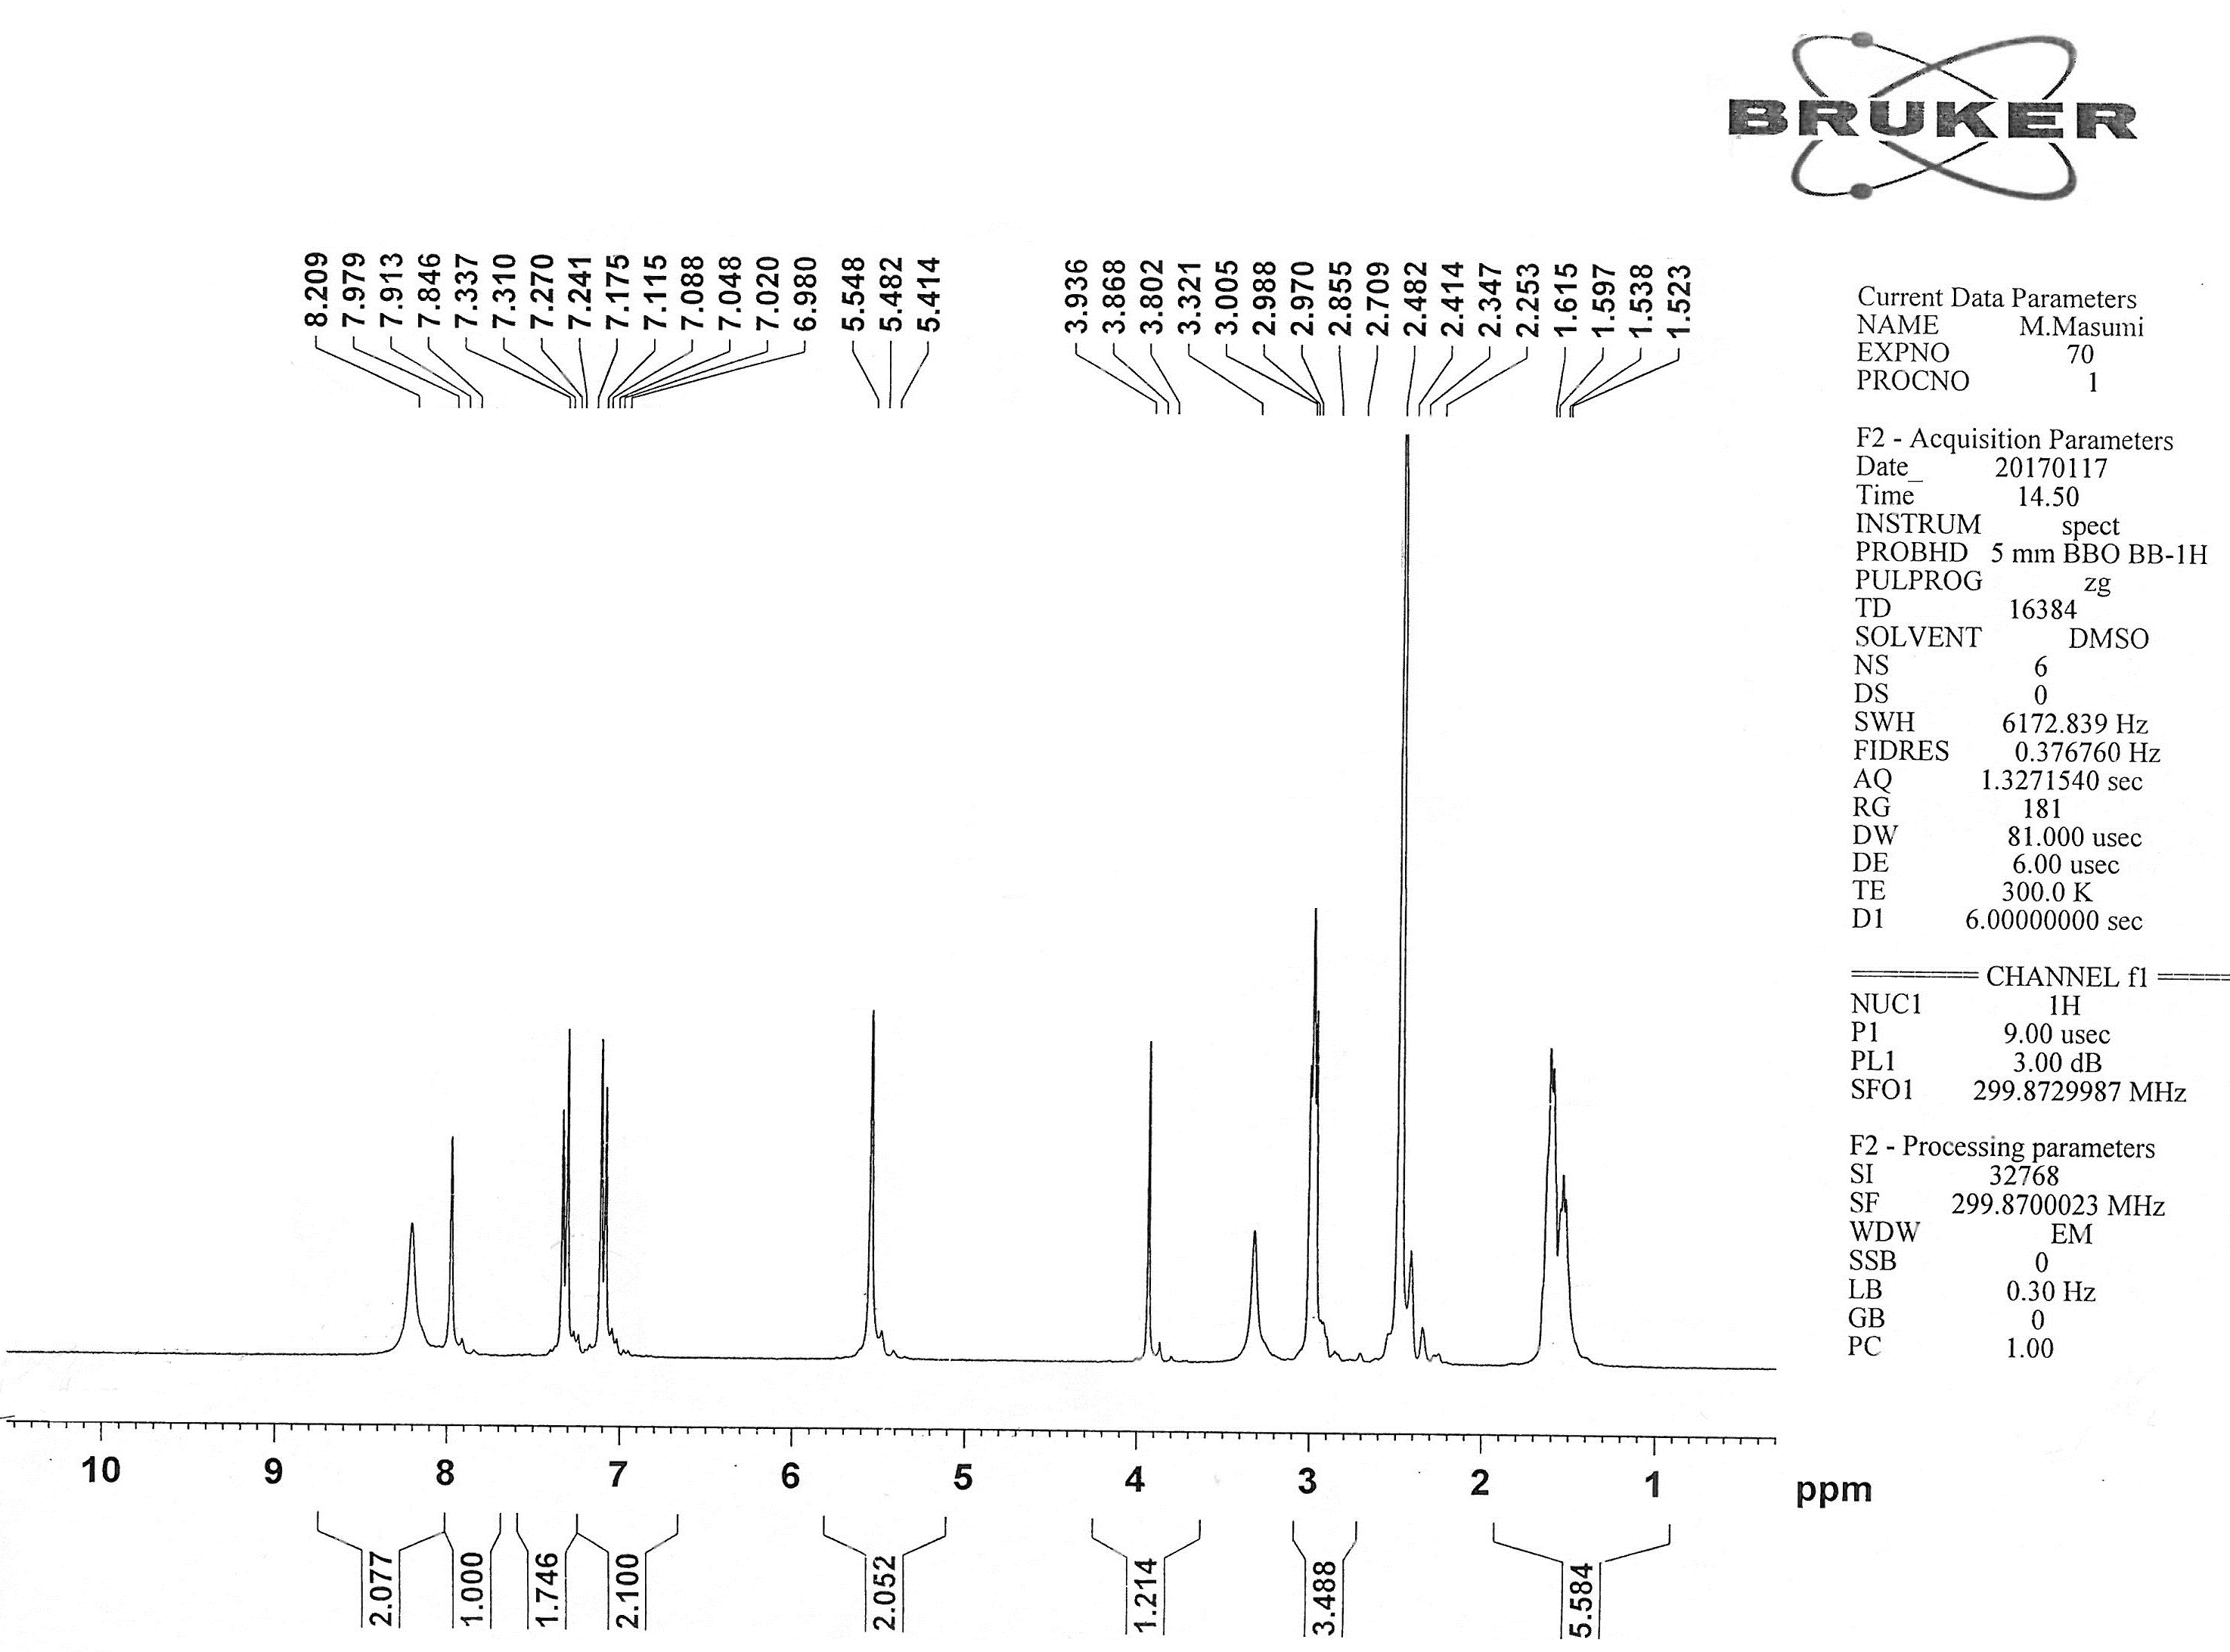
**

**1H NMR of 4a**


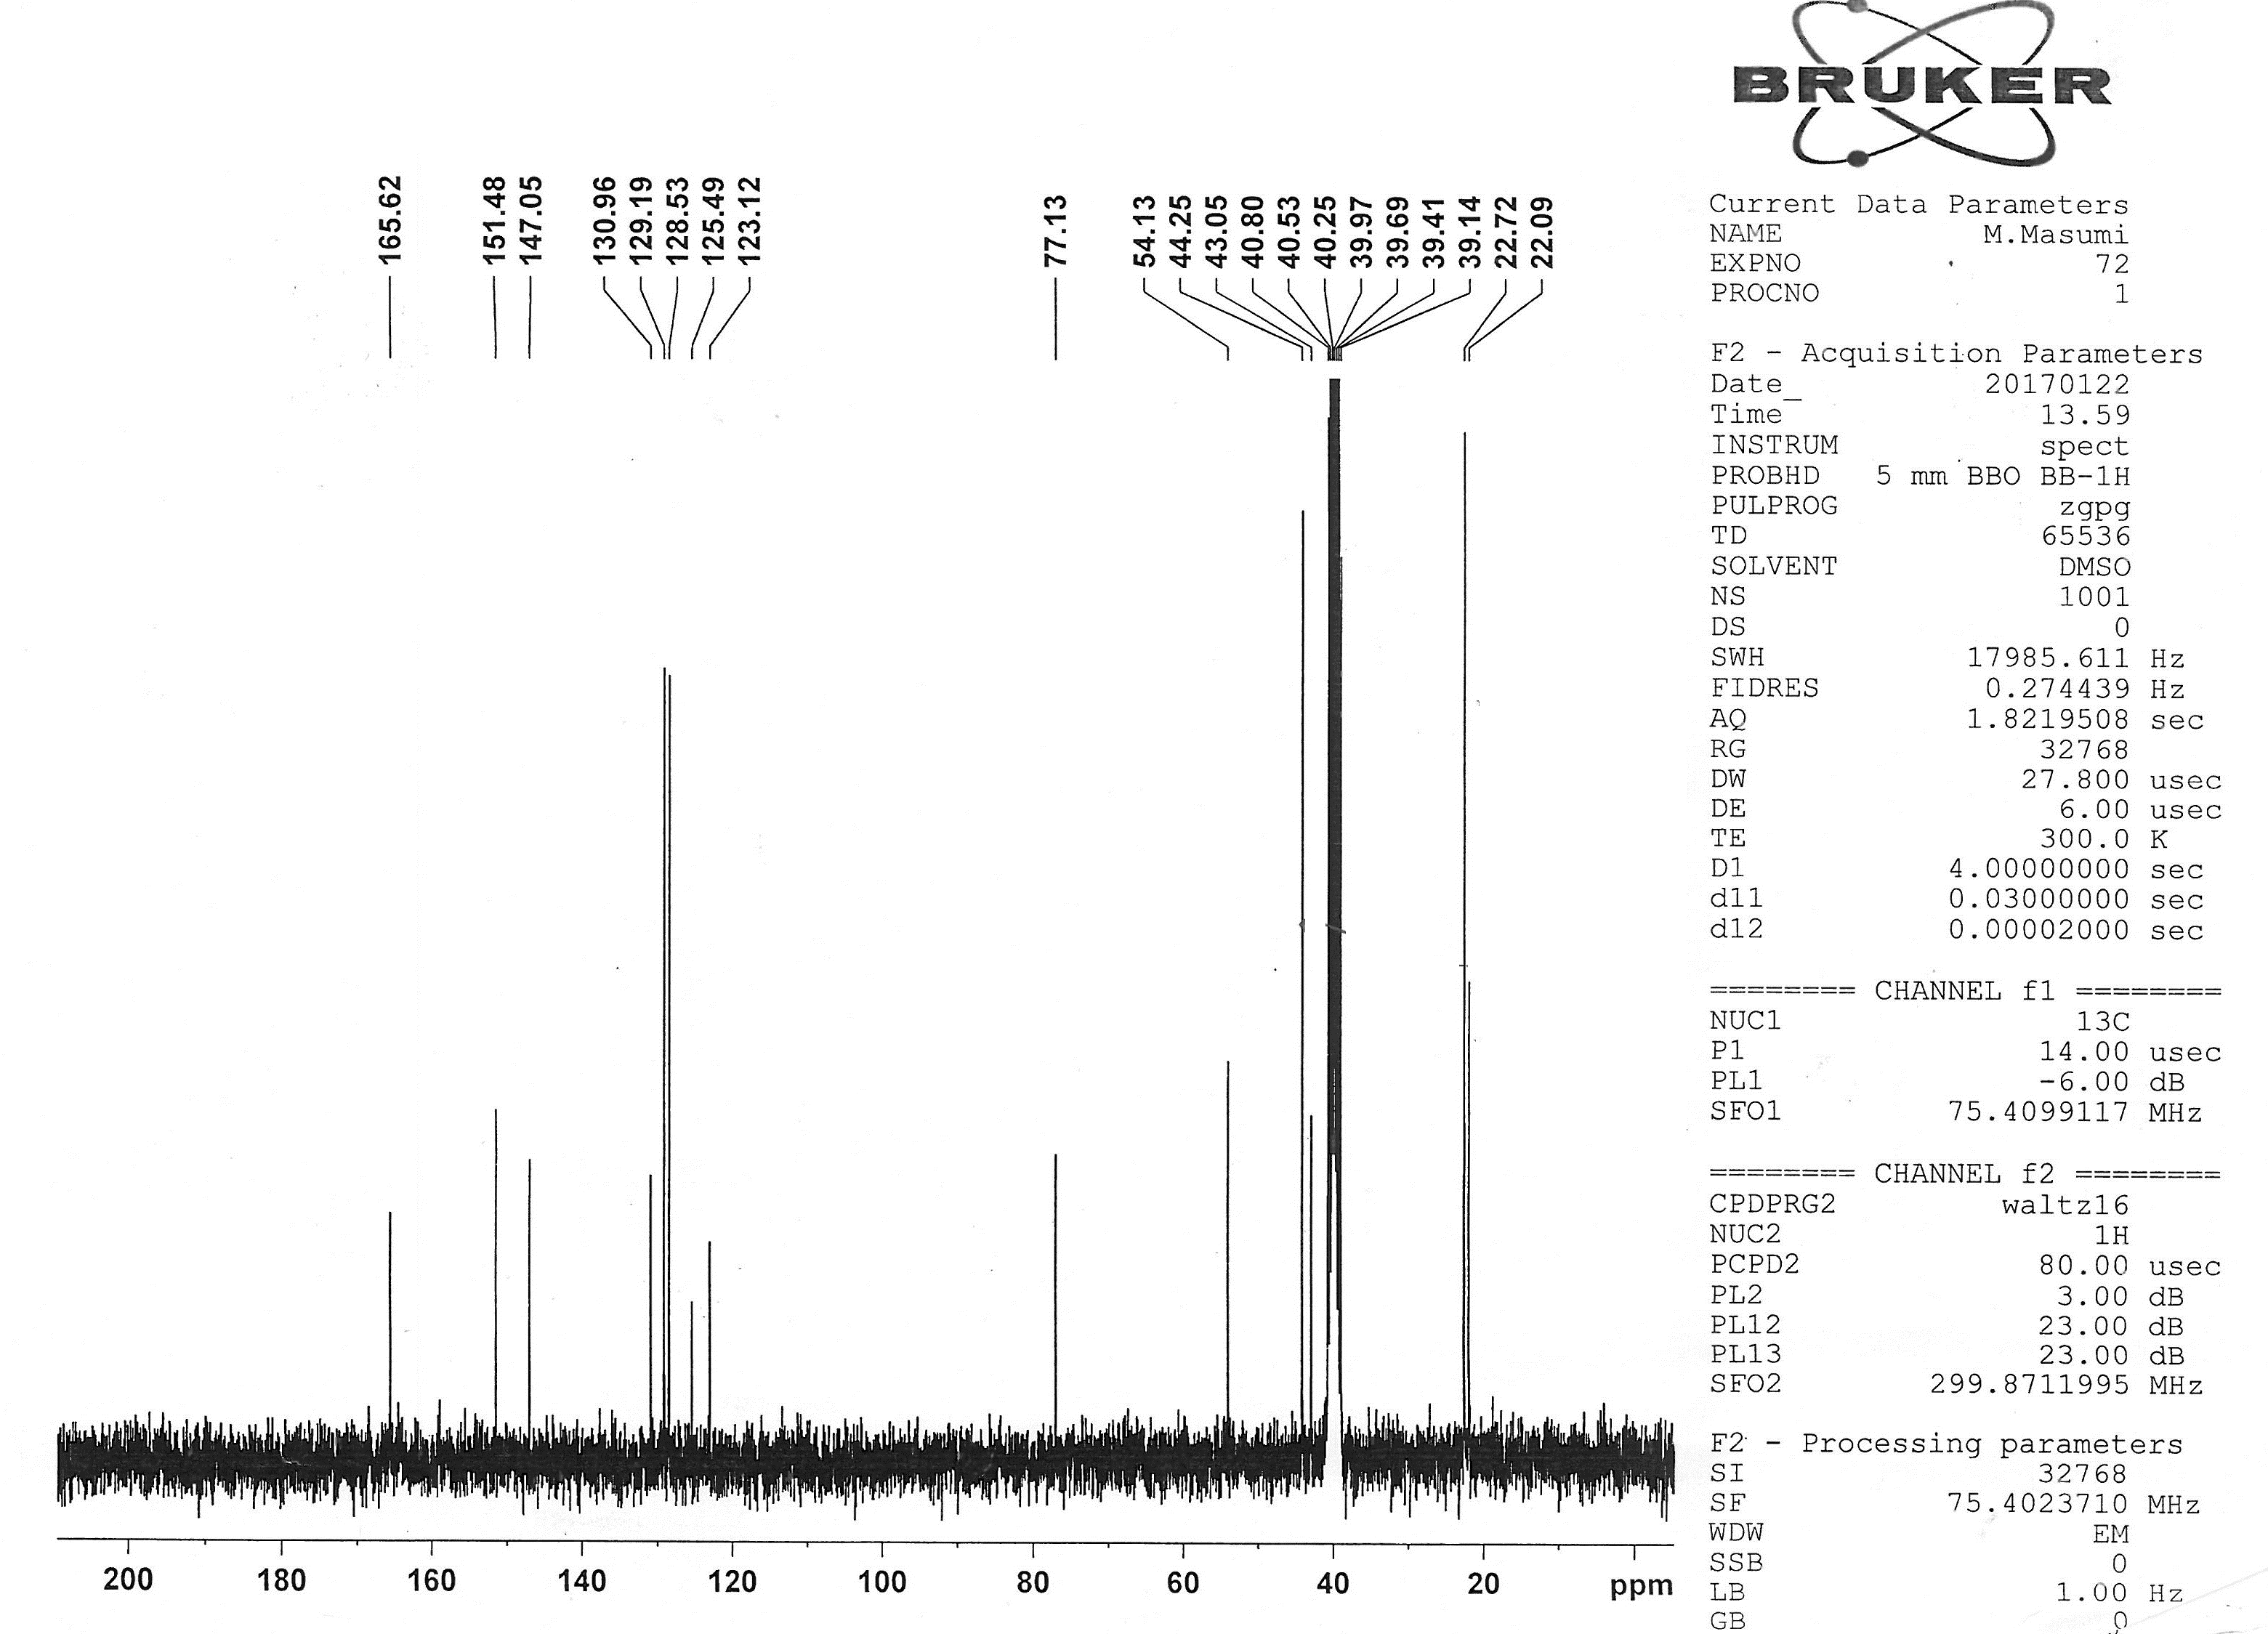


**13C NMR of 4a**


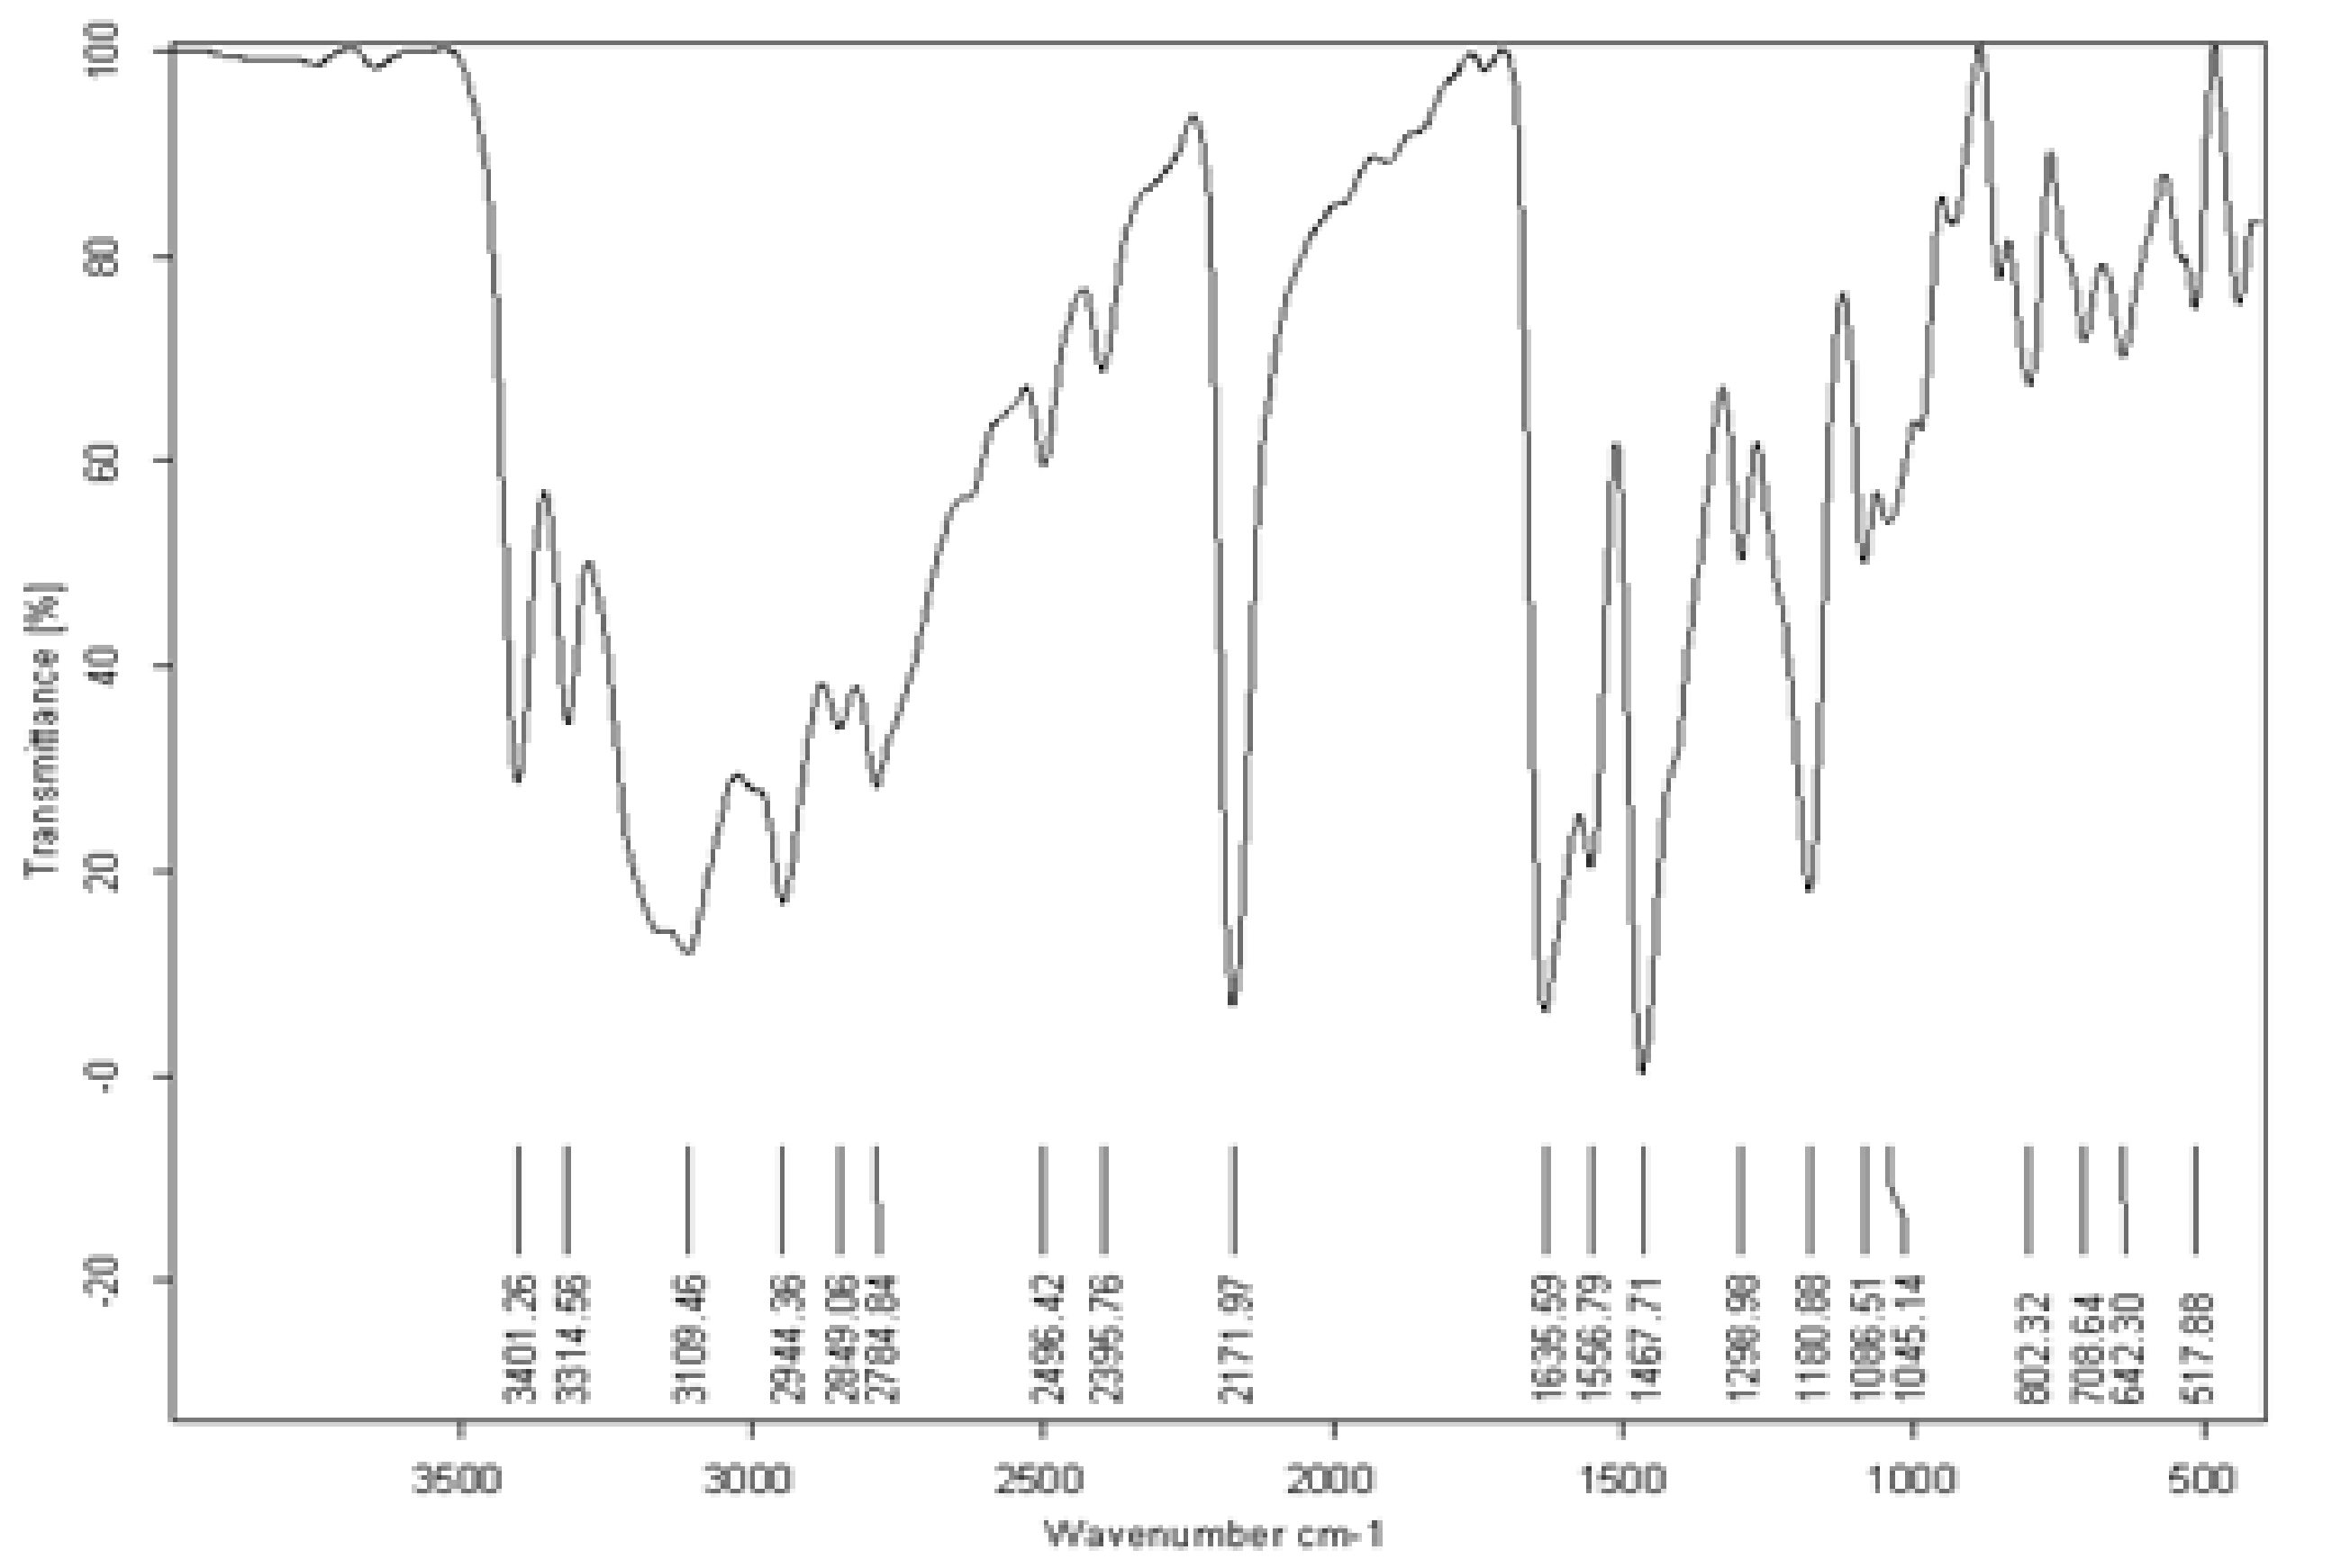


**IR of 4a**


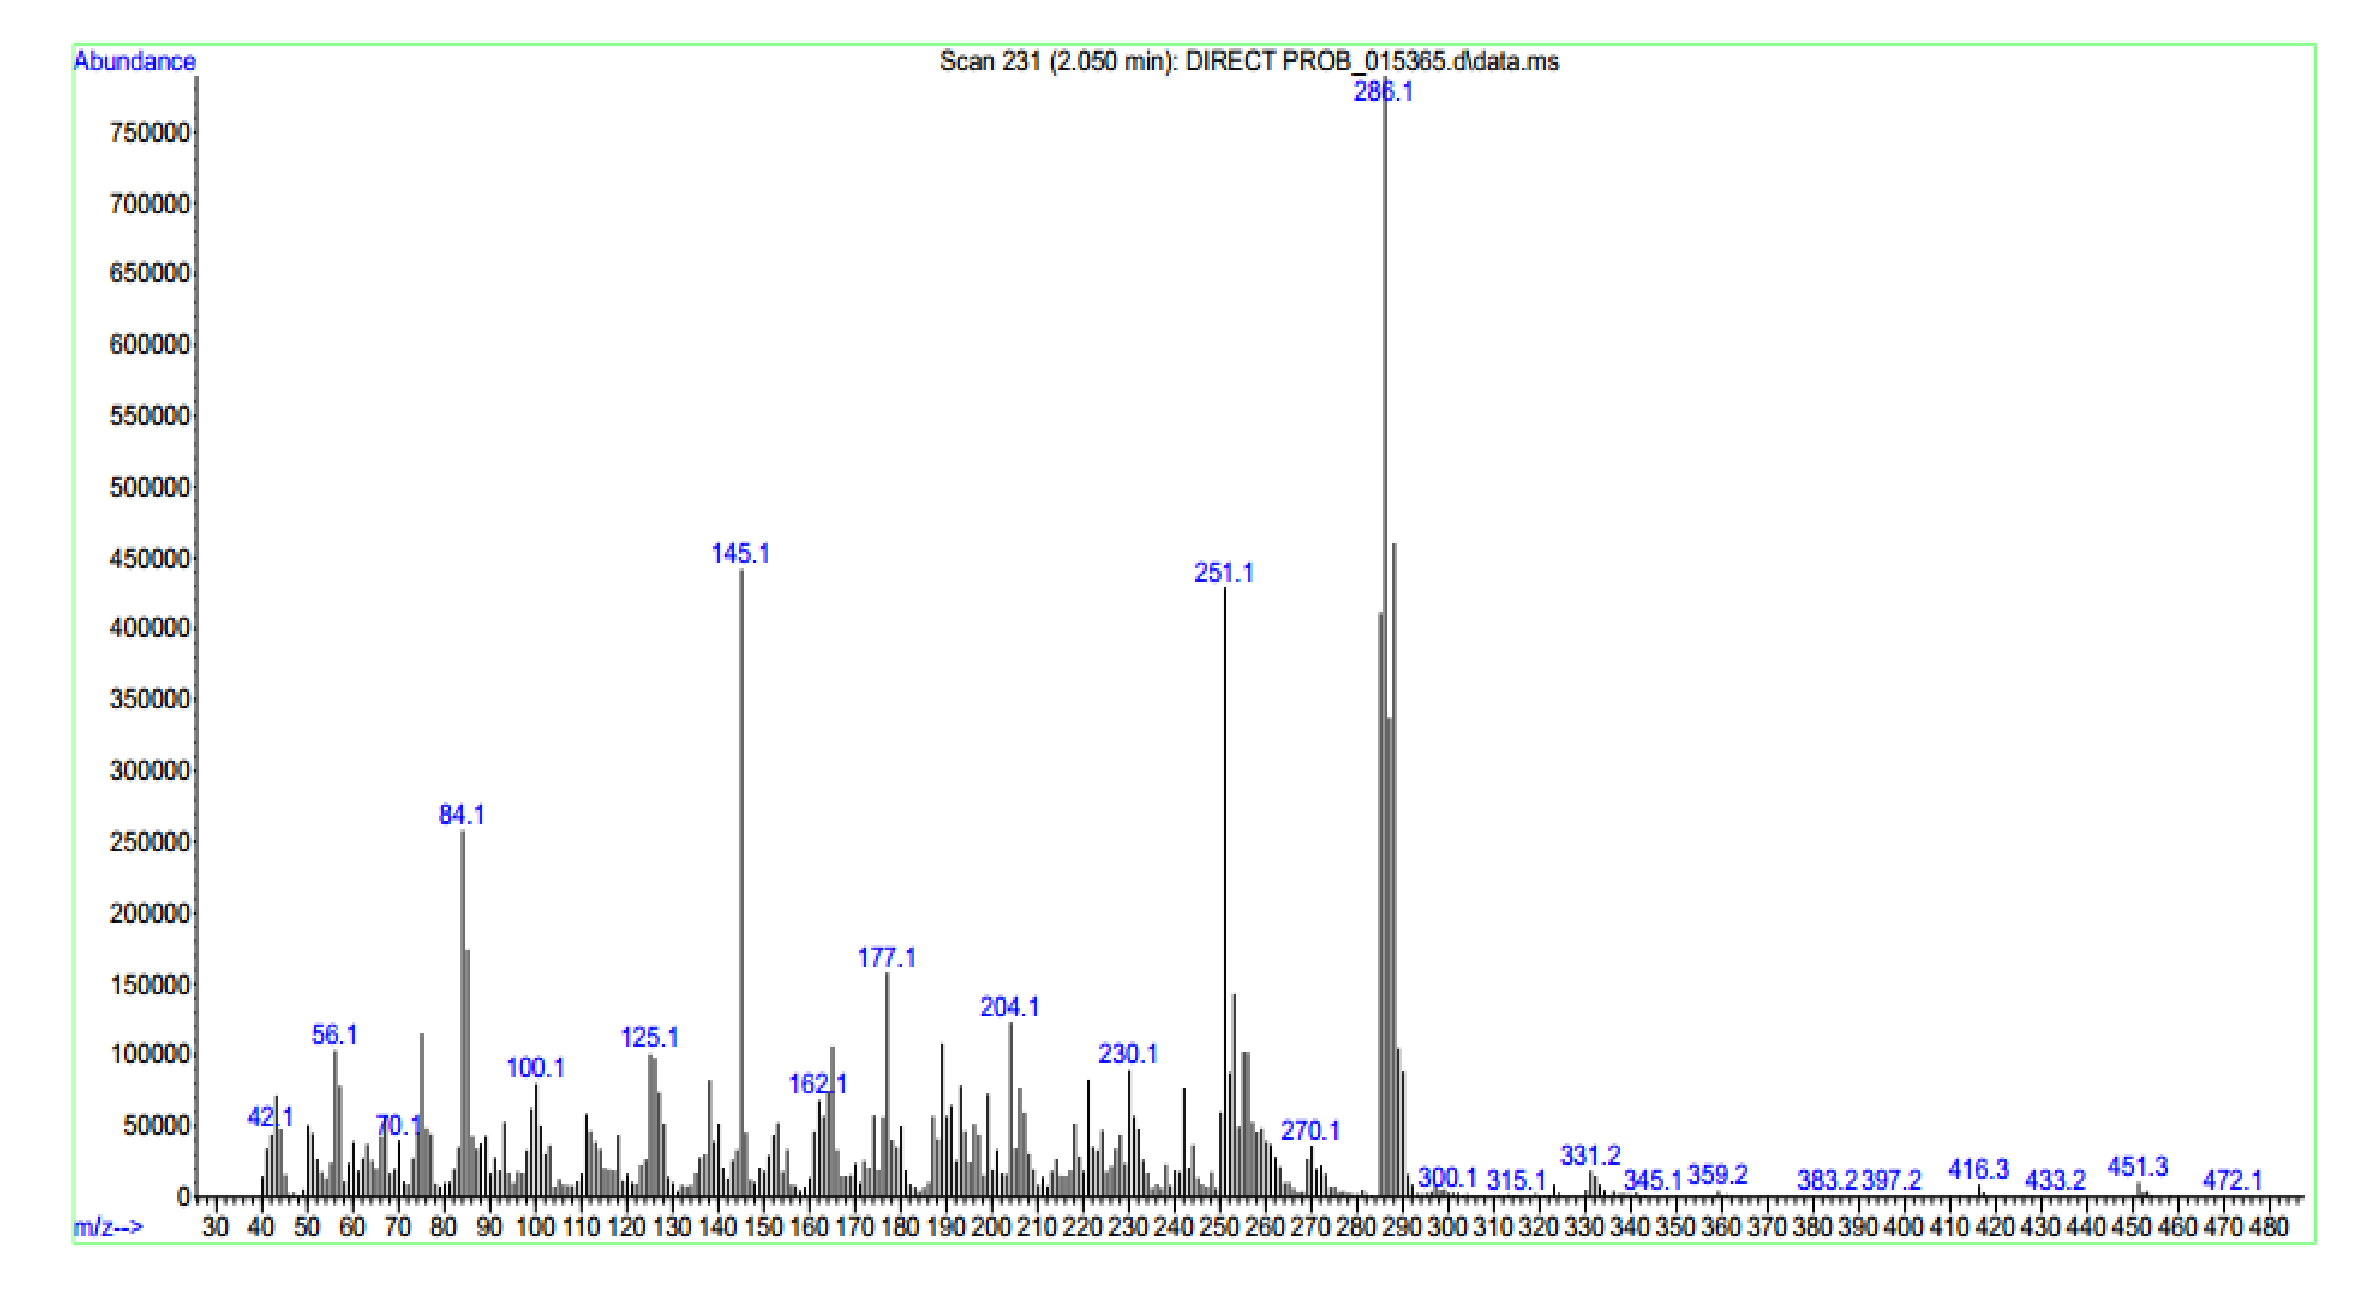


**Mass of 4a**


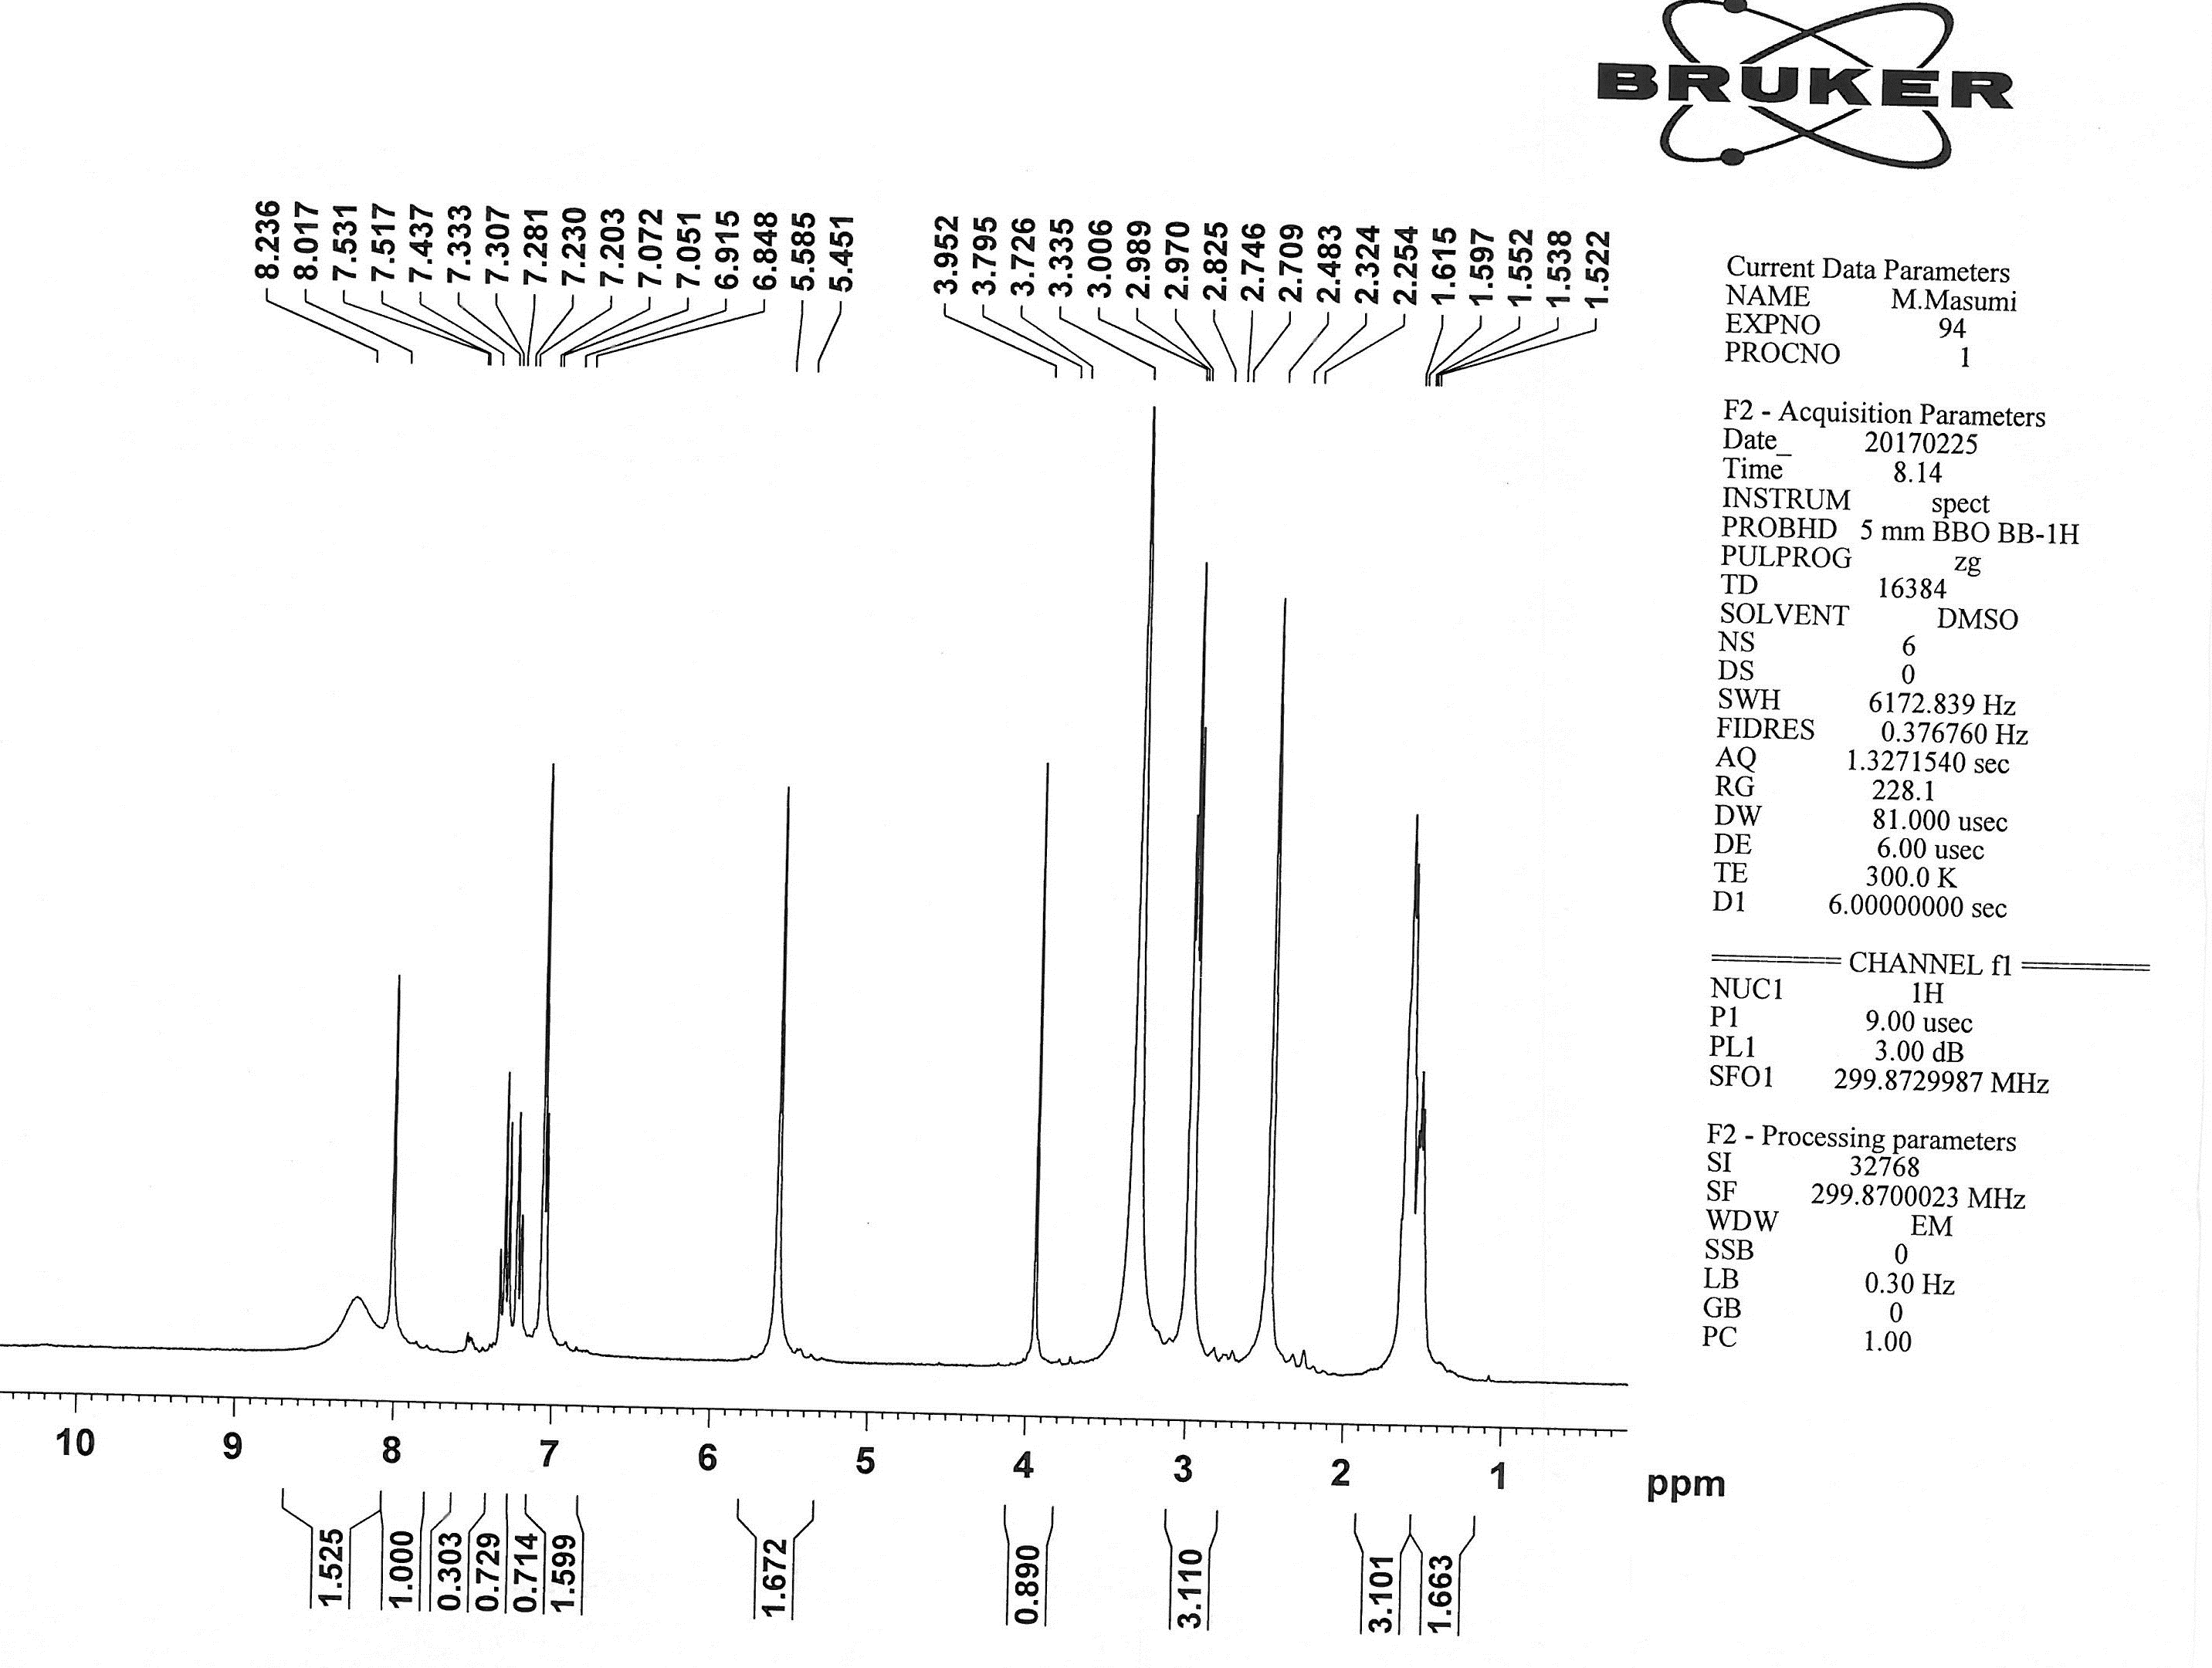


**1H NMR of 4b**


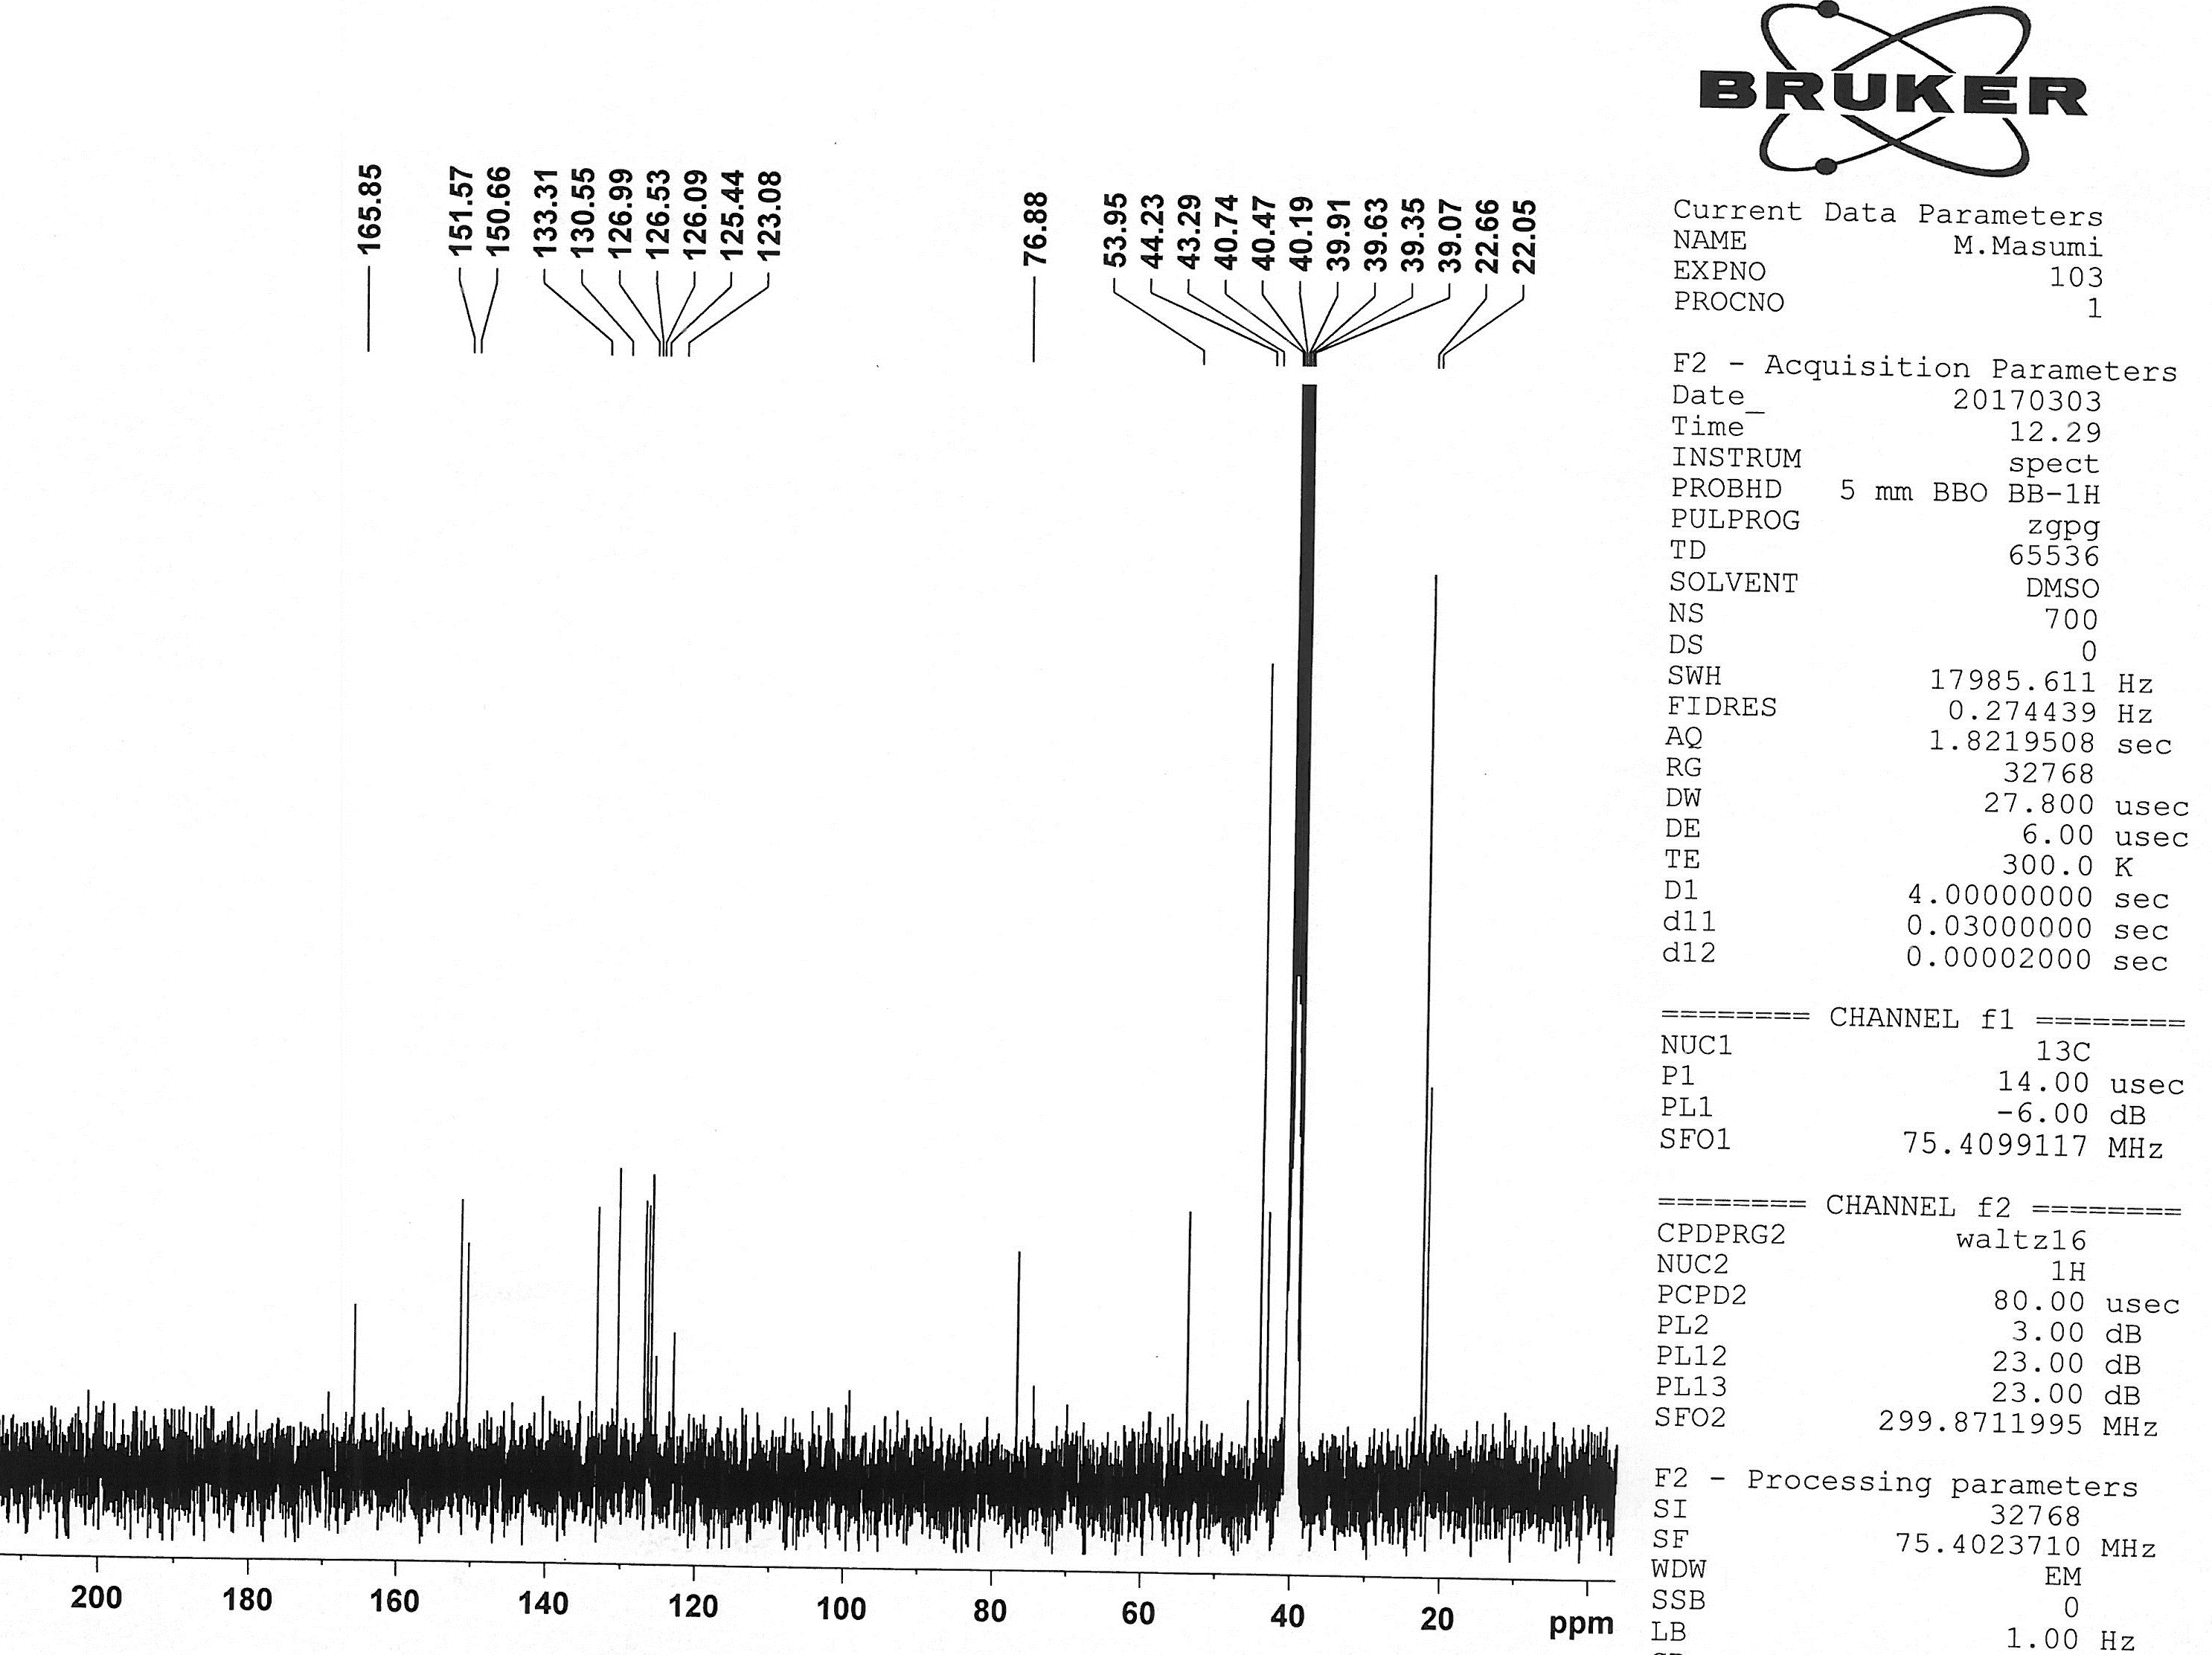


**13C NMR of 4b**


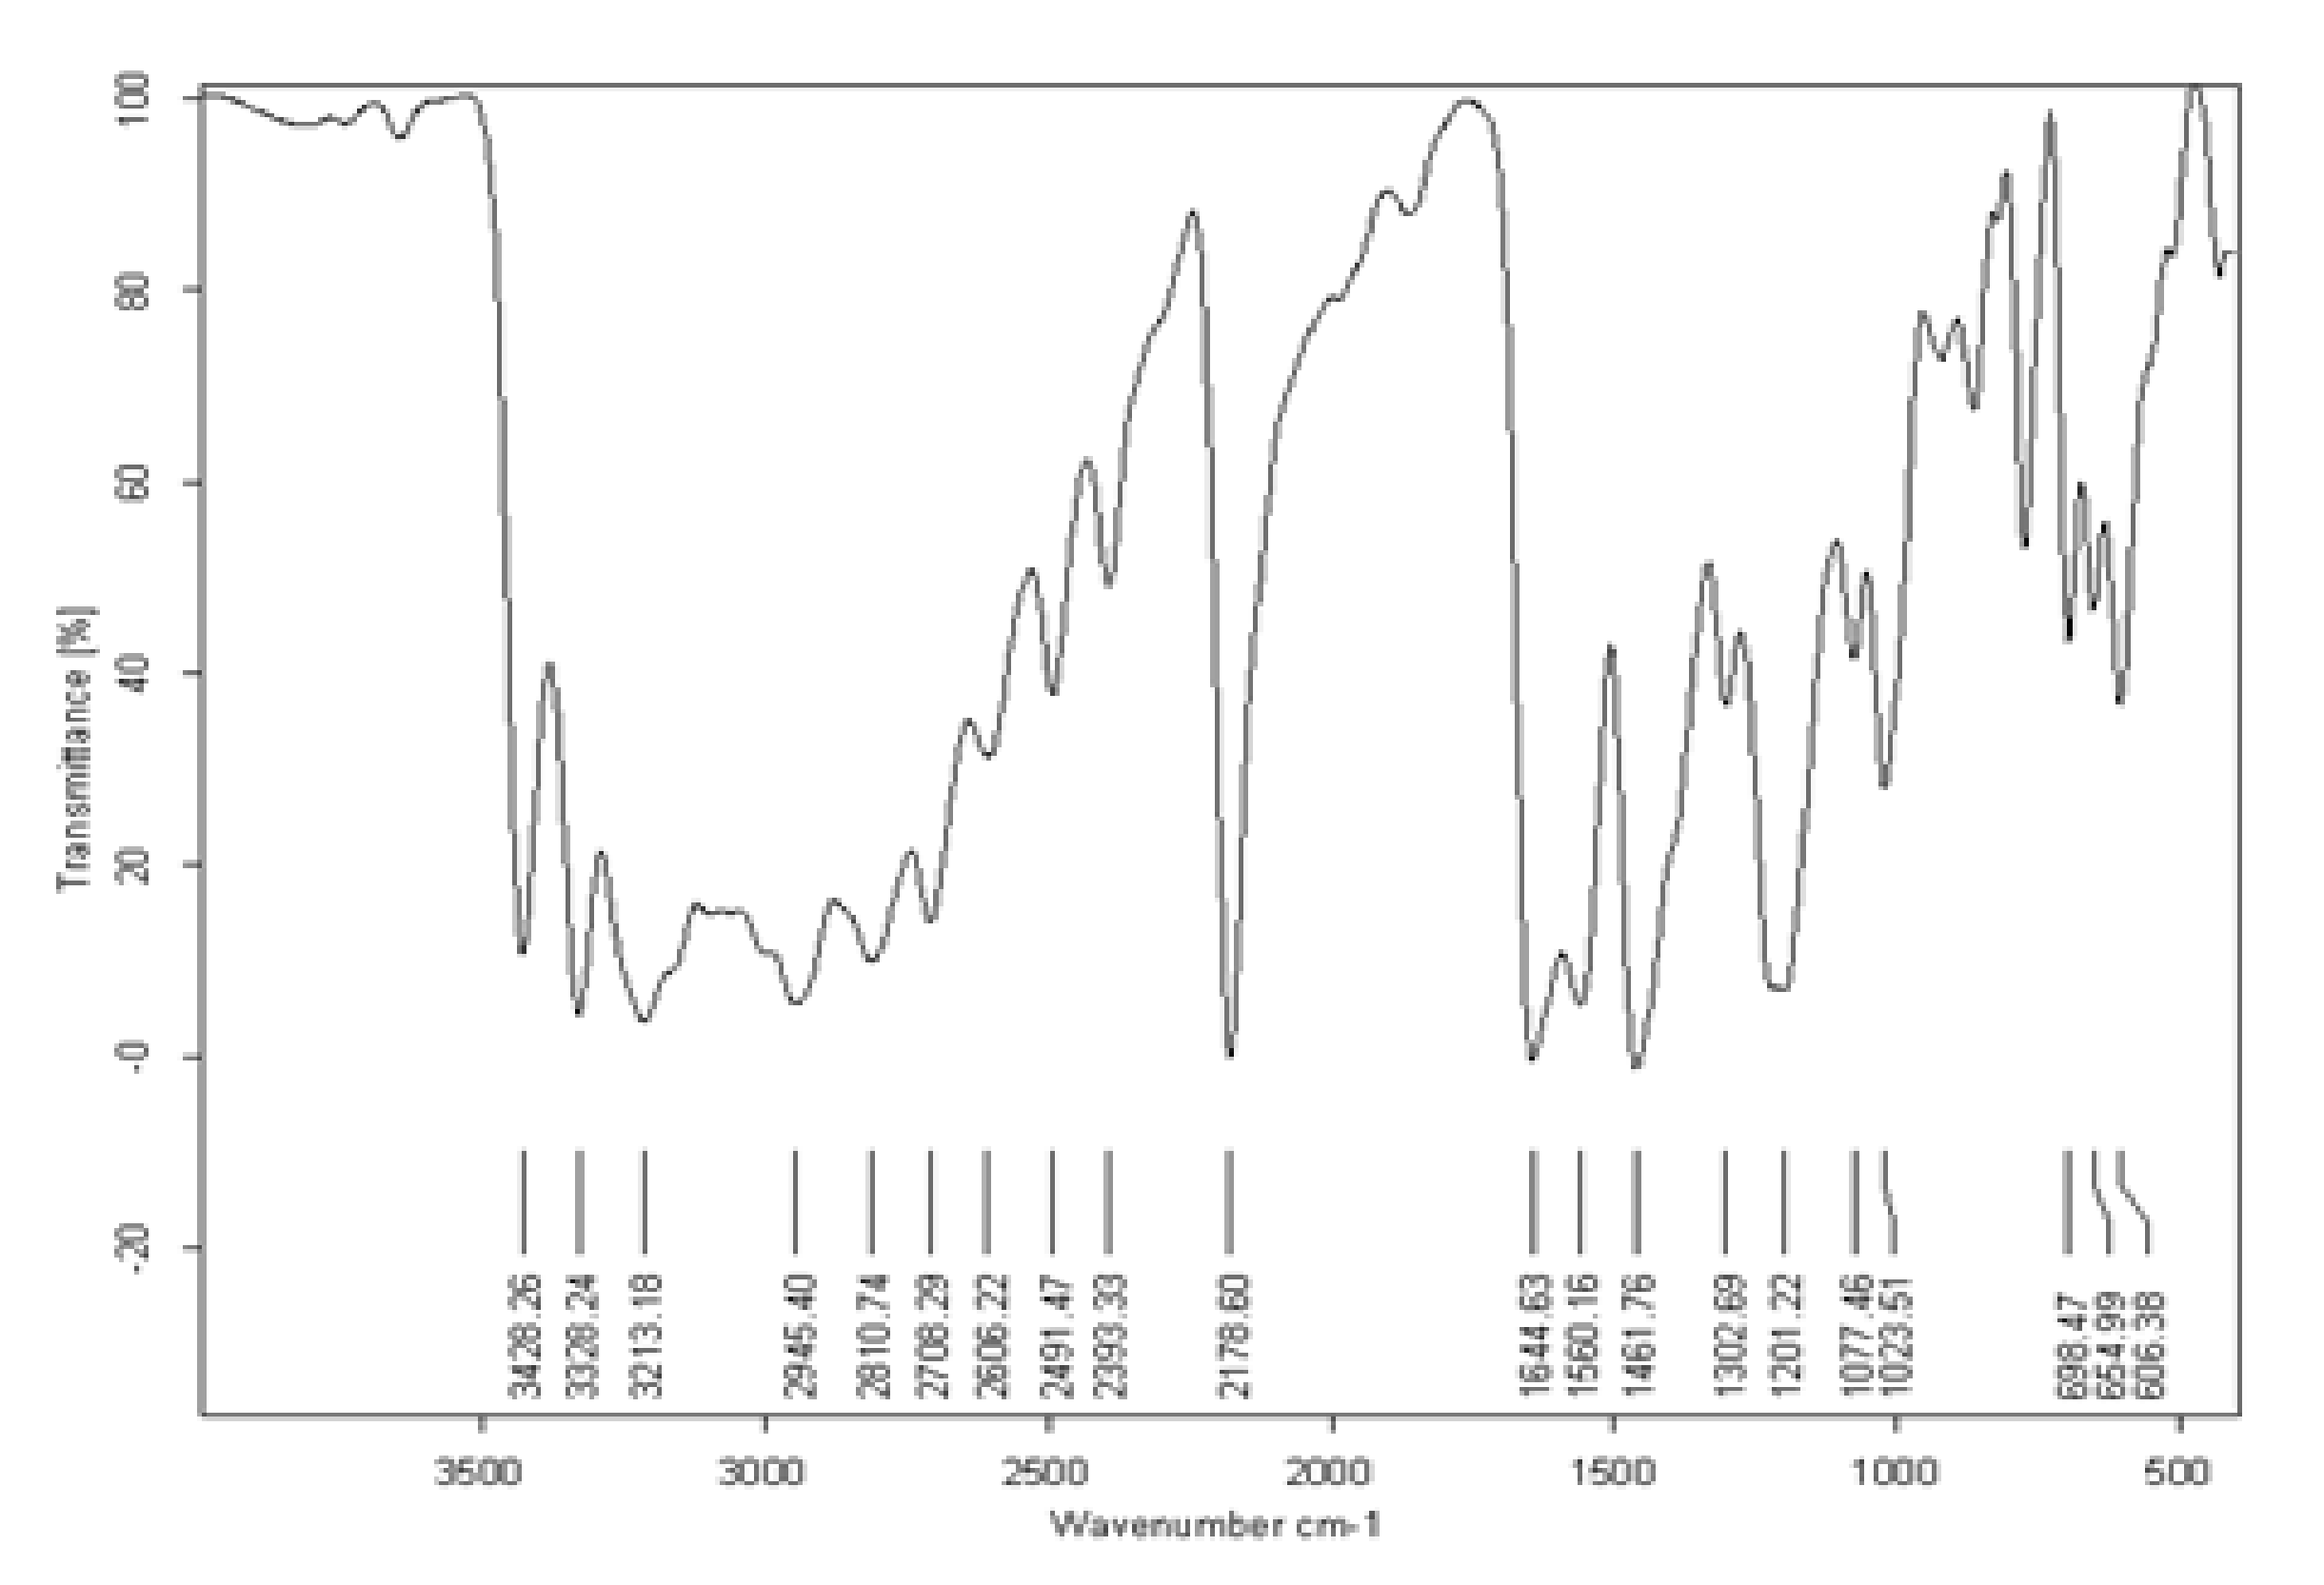


**IR of 4b**


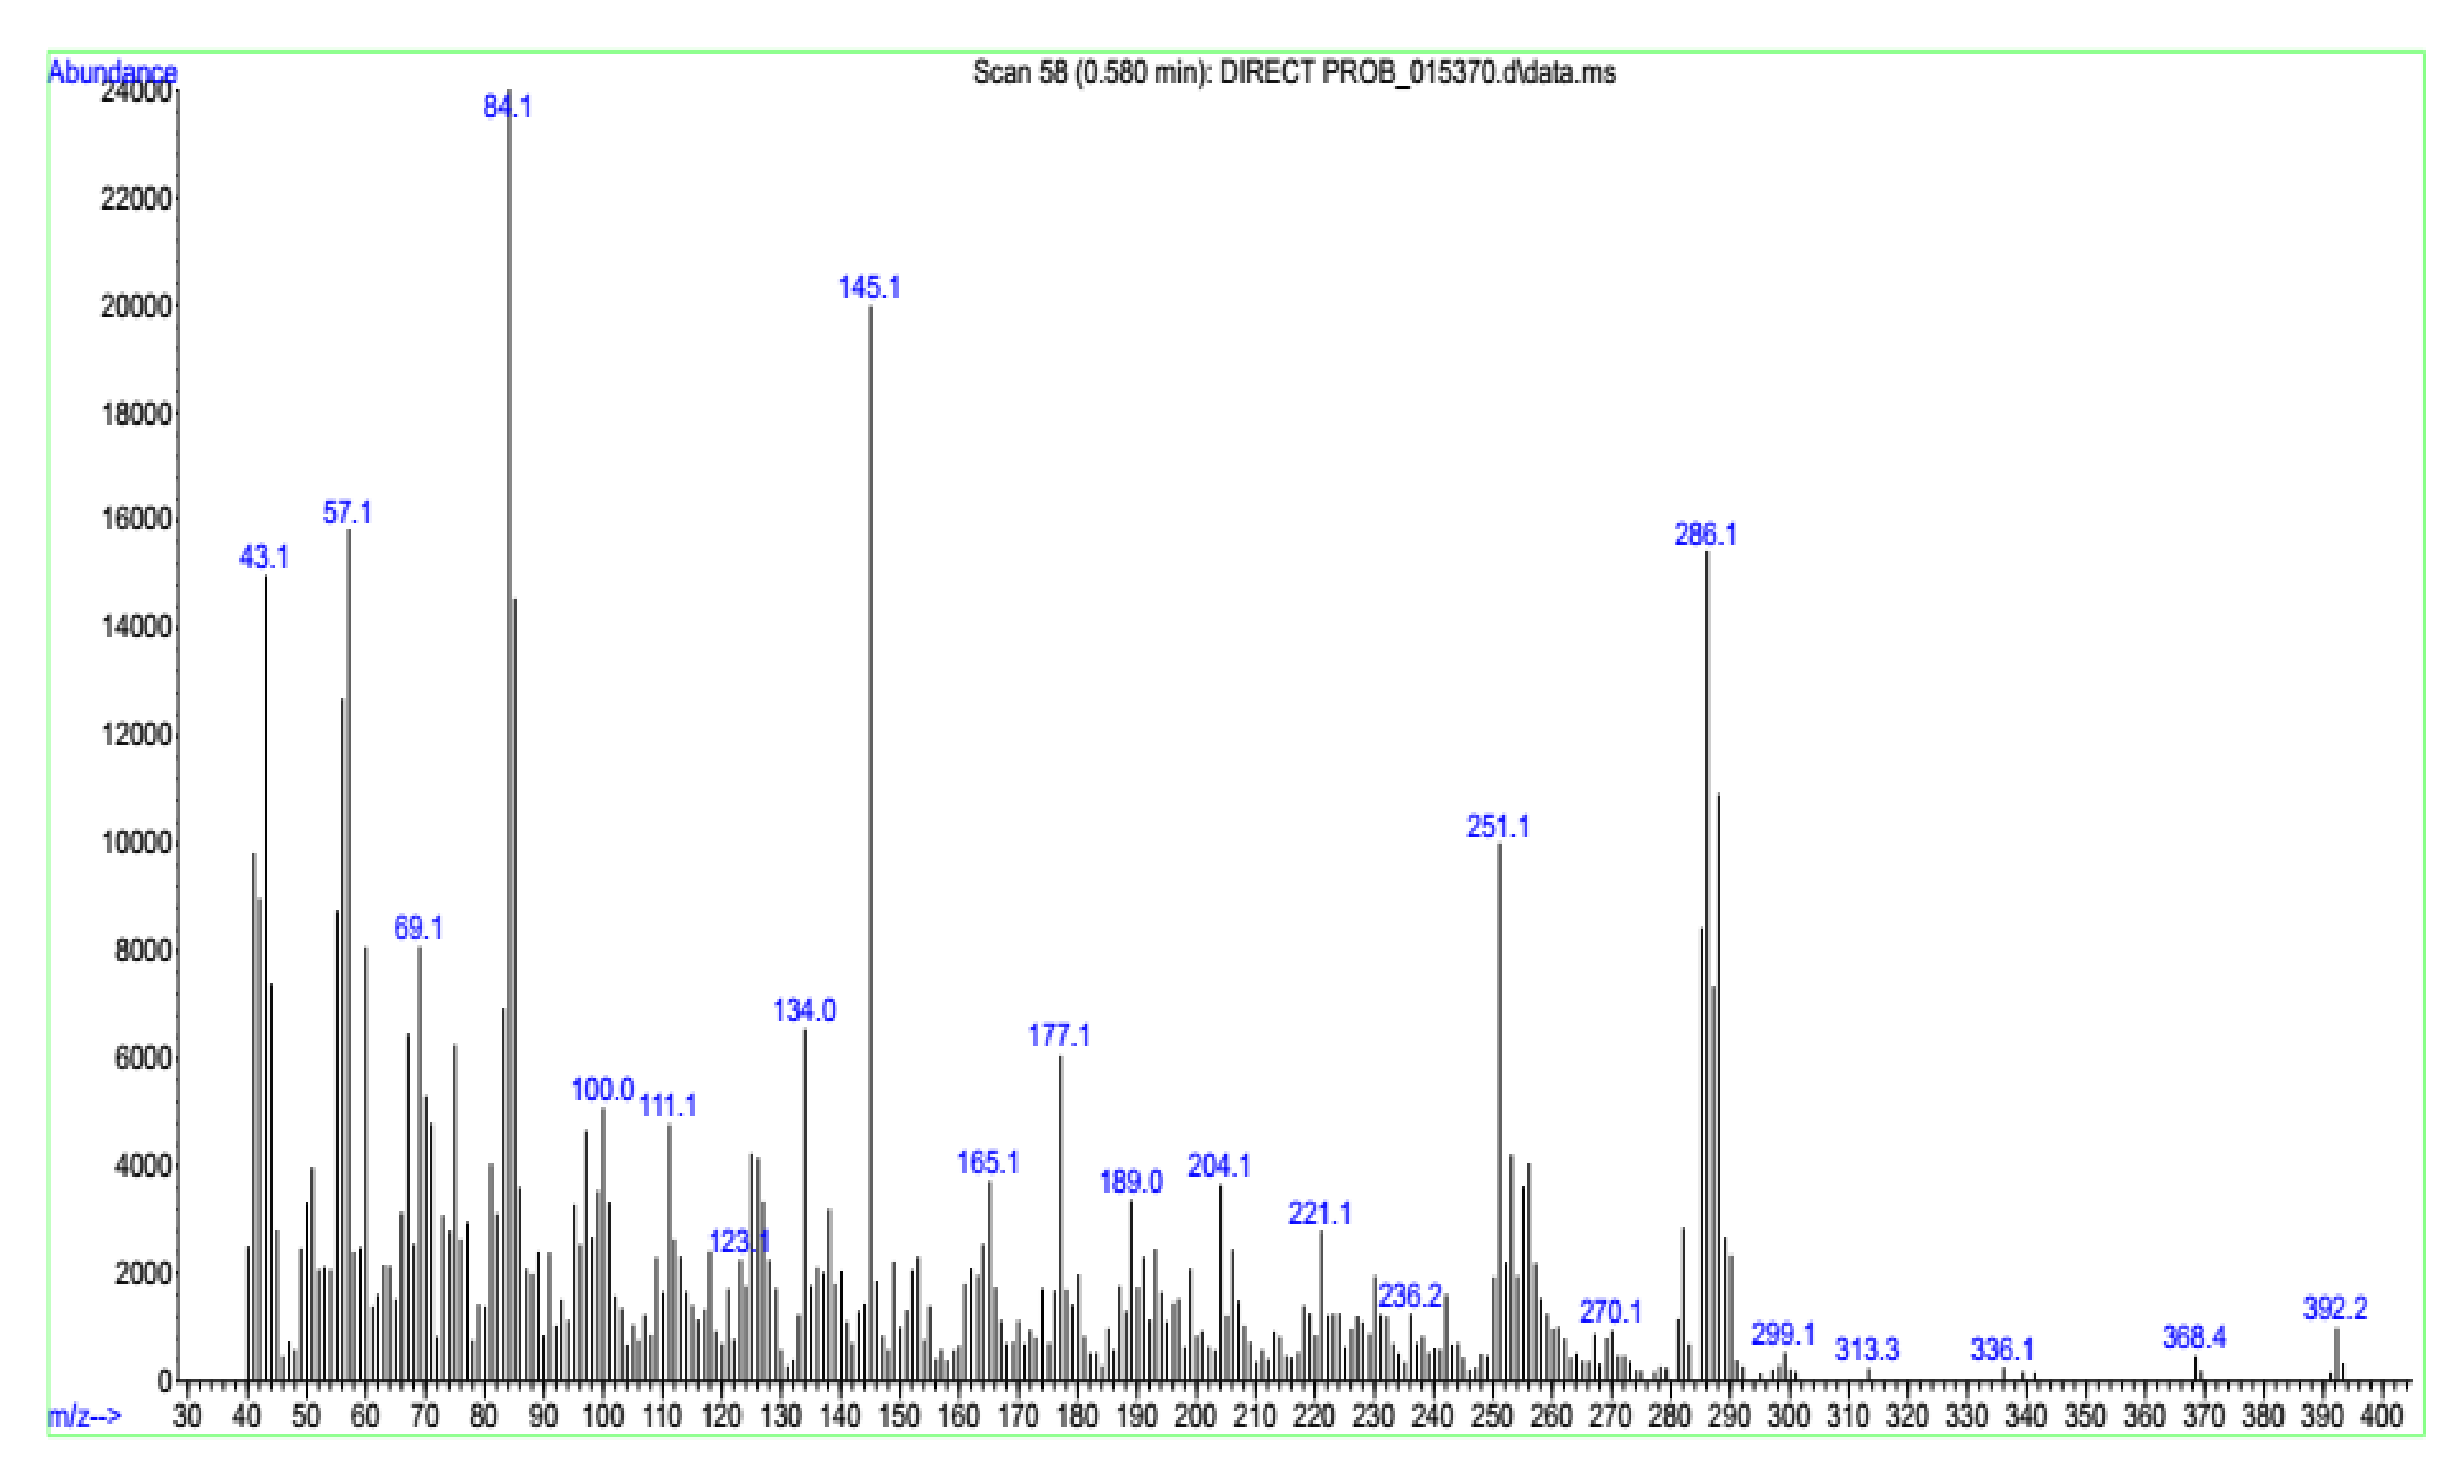


**Mass of 4b**


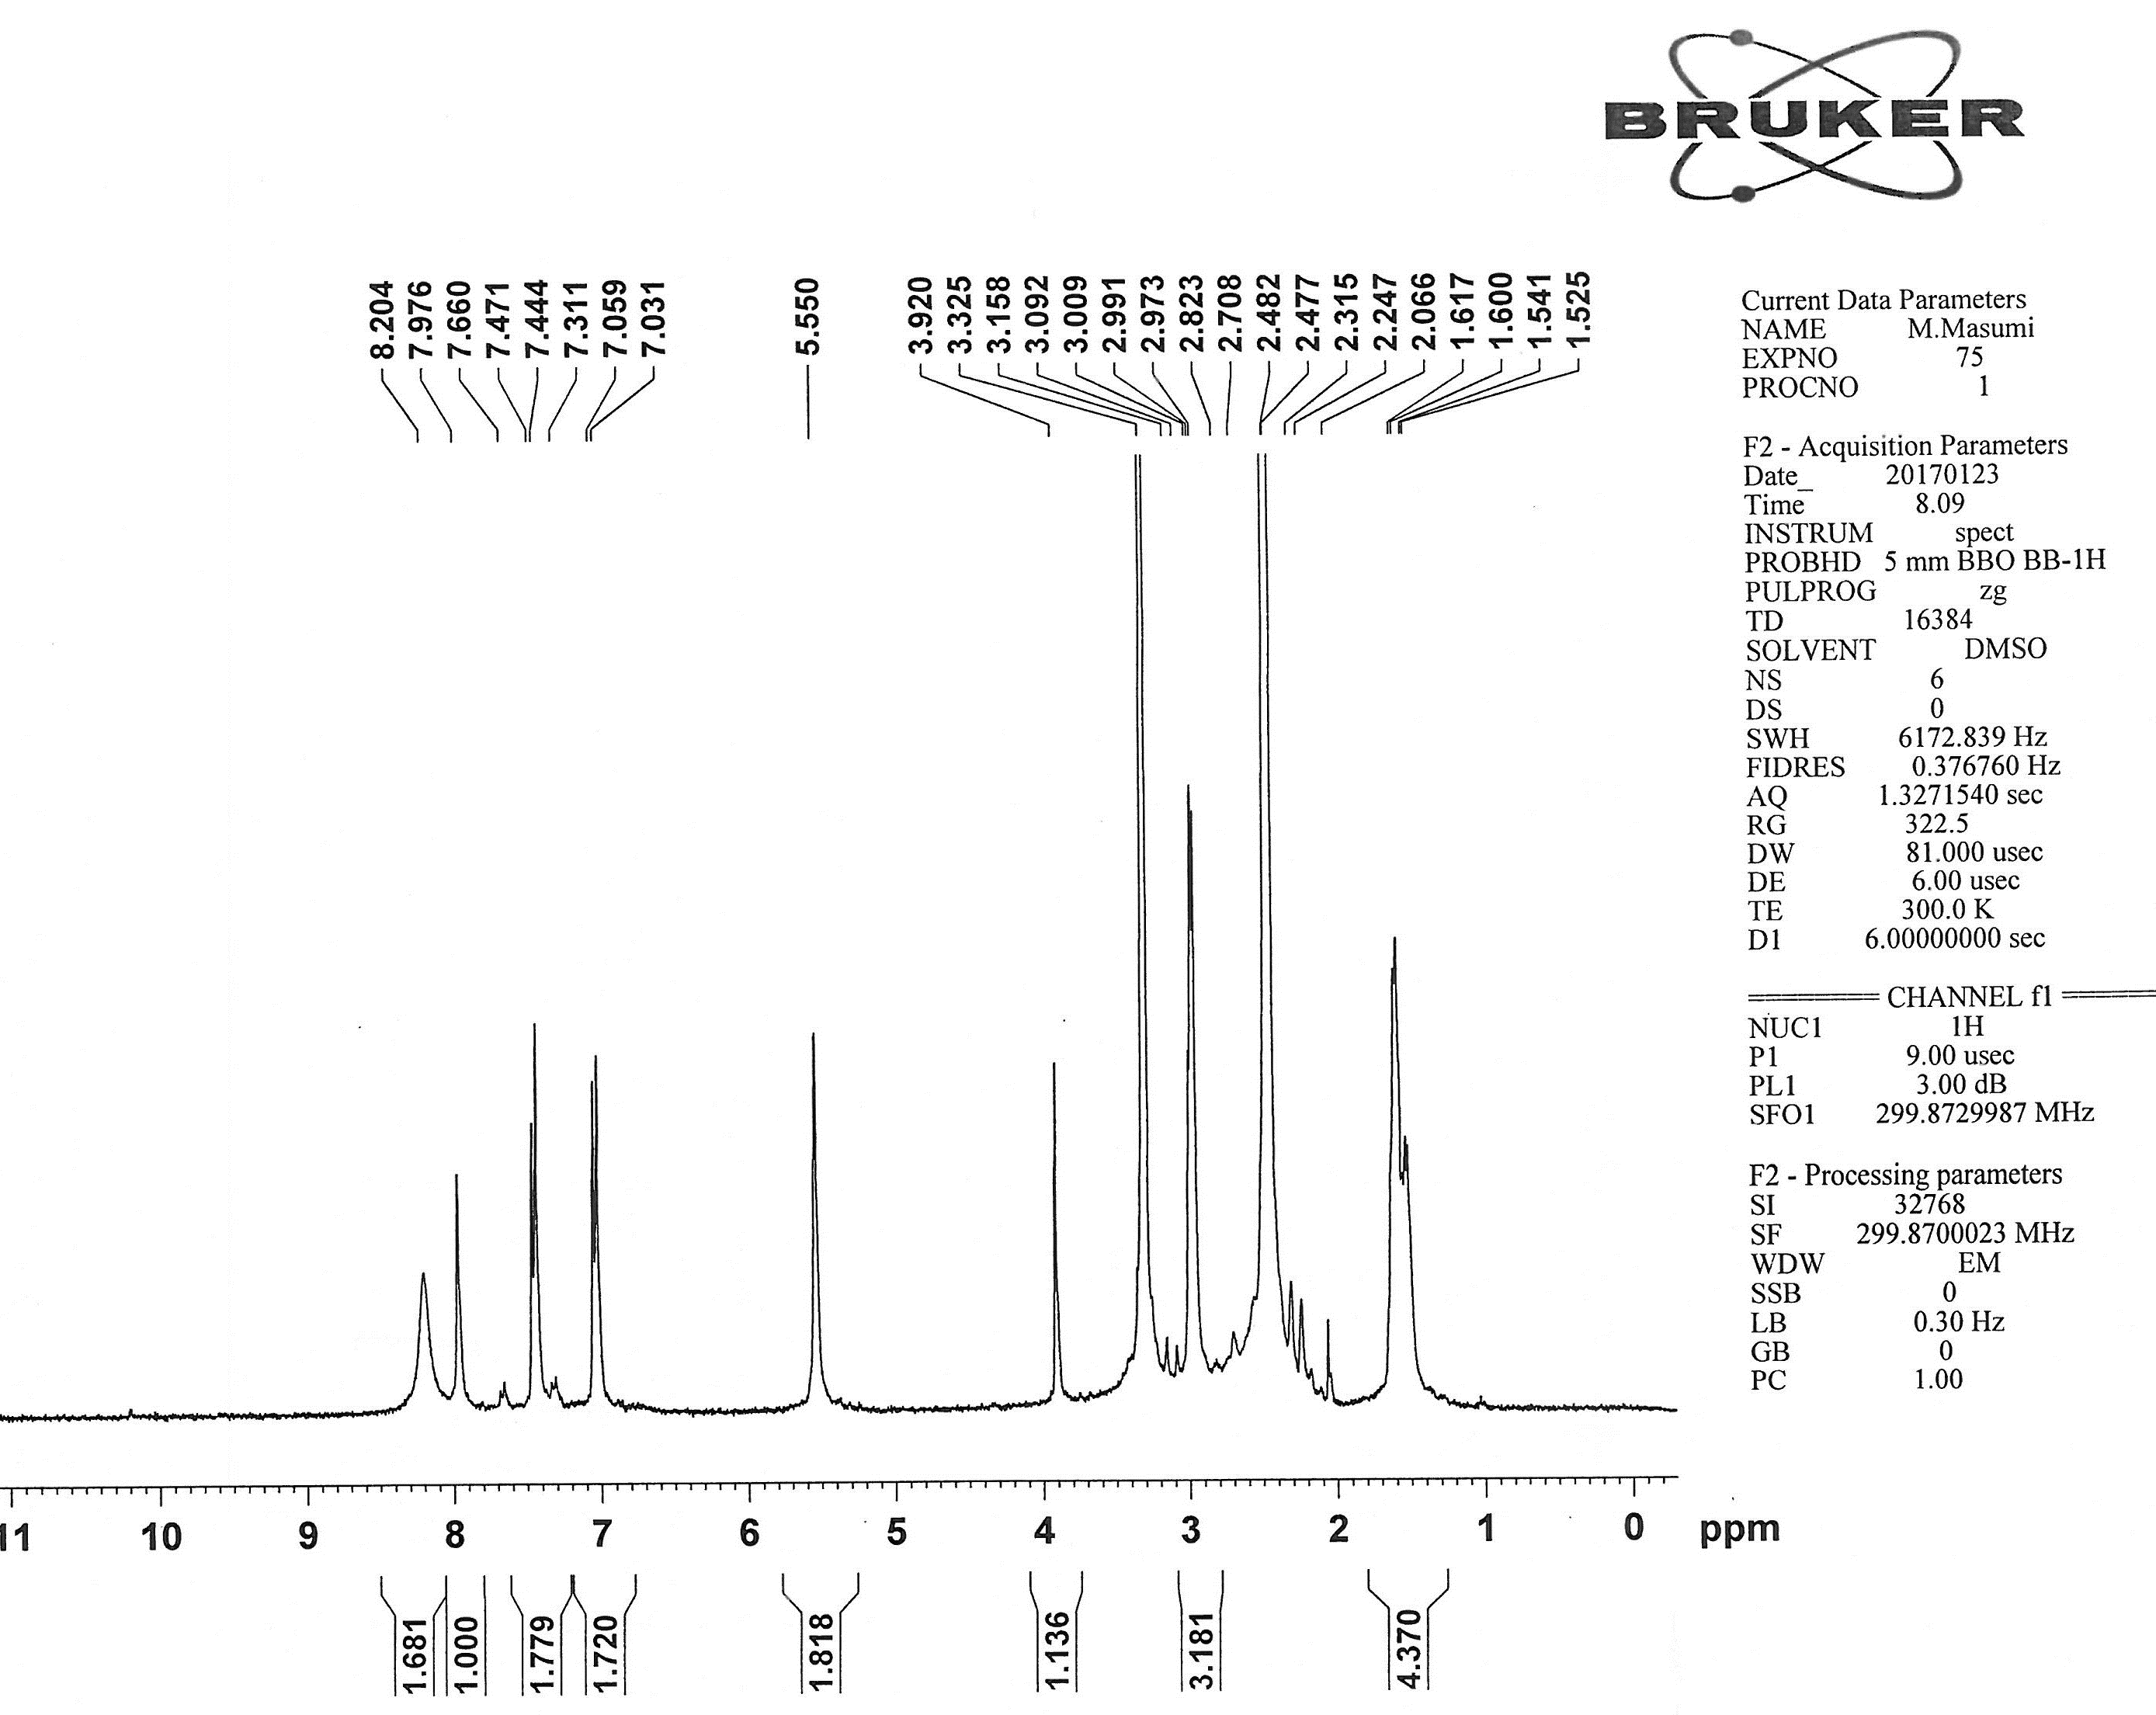


**1H NMR of 4c**


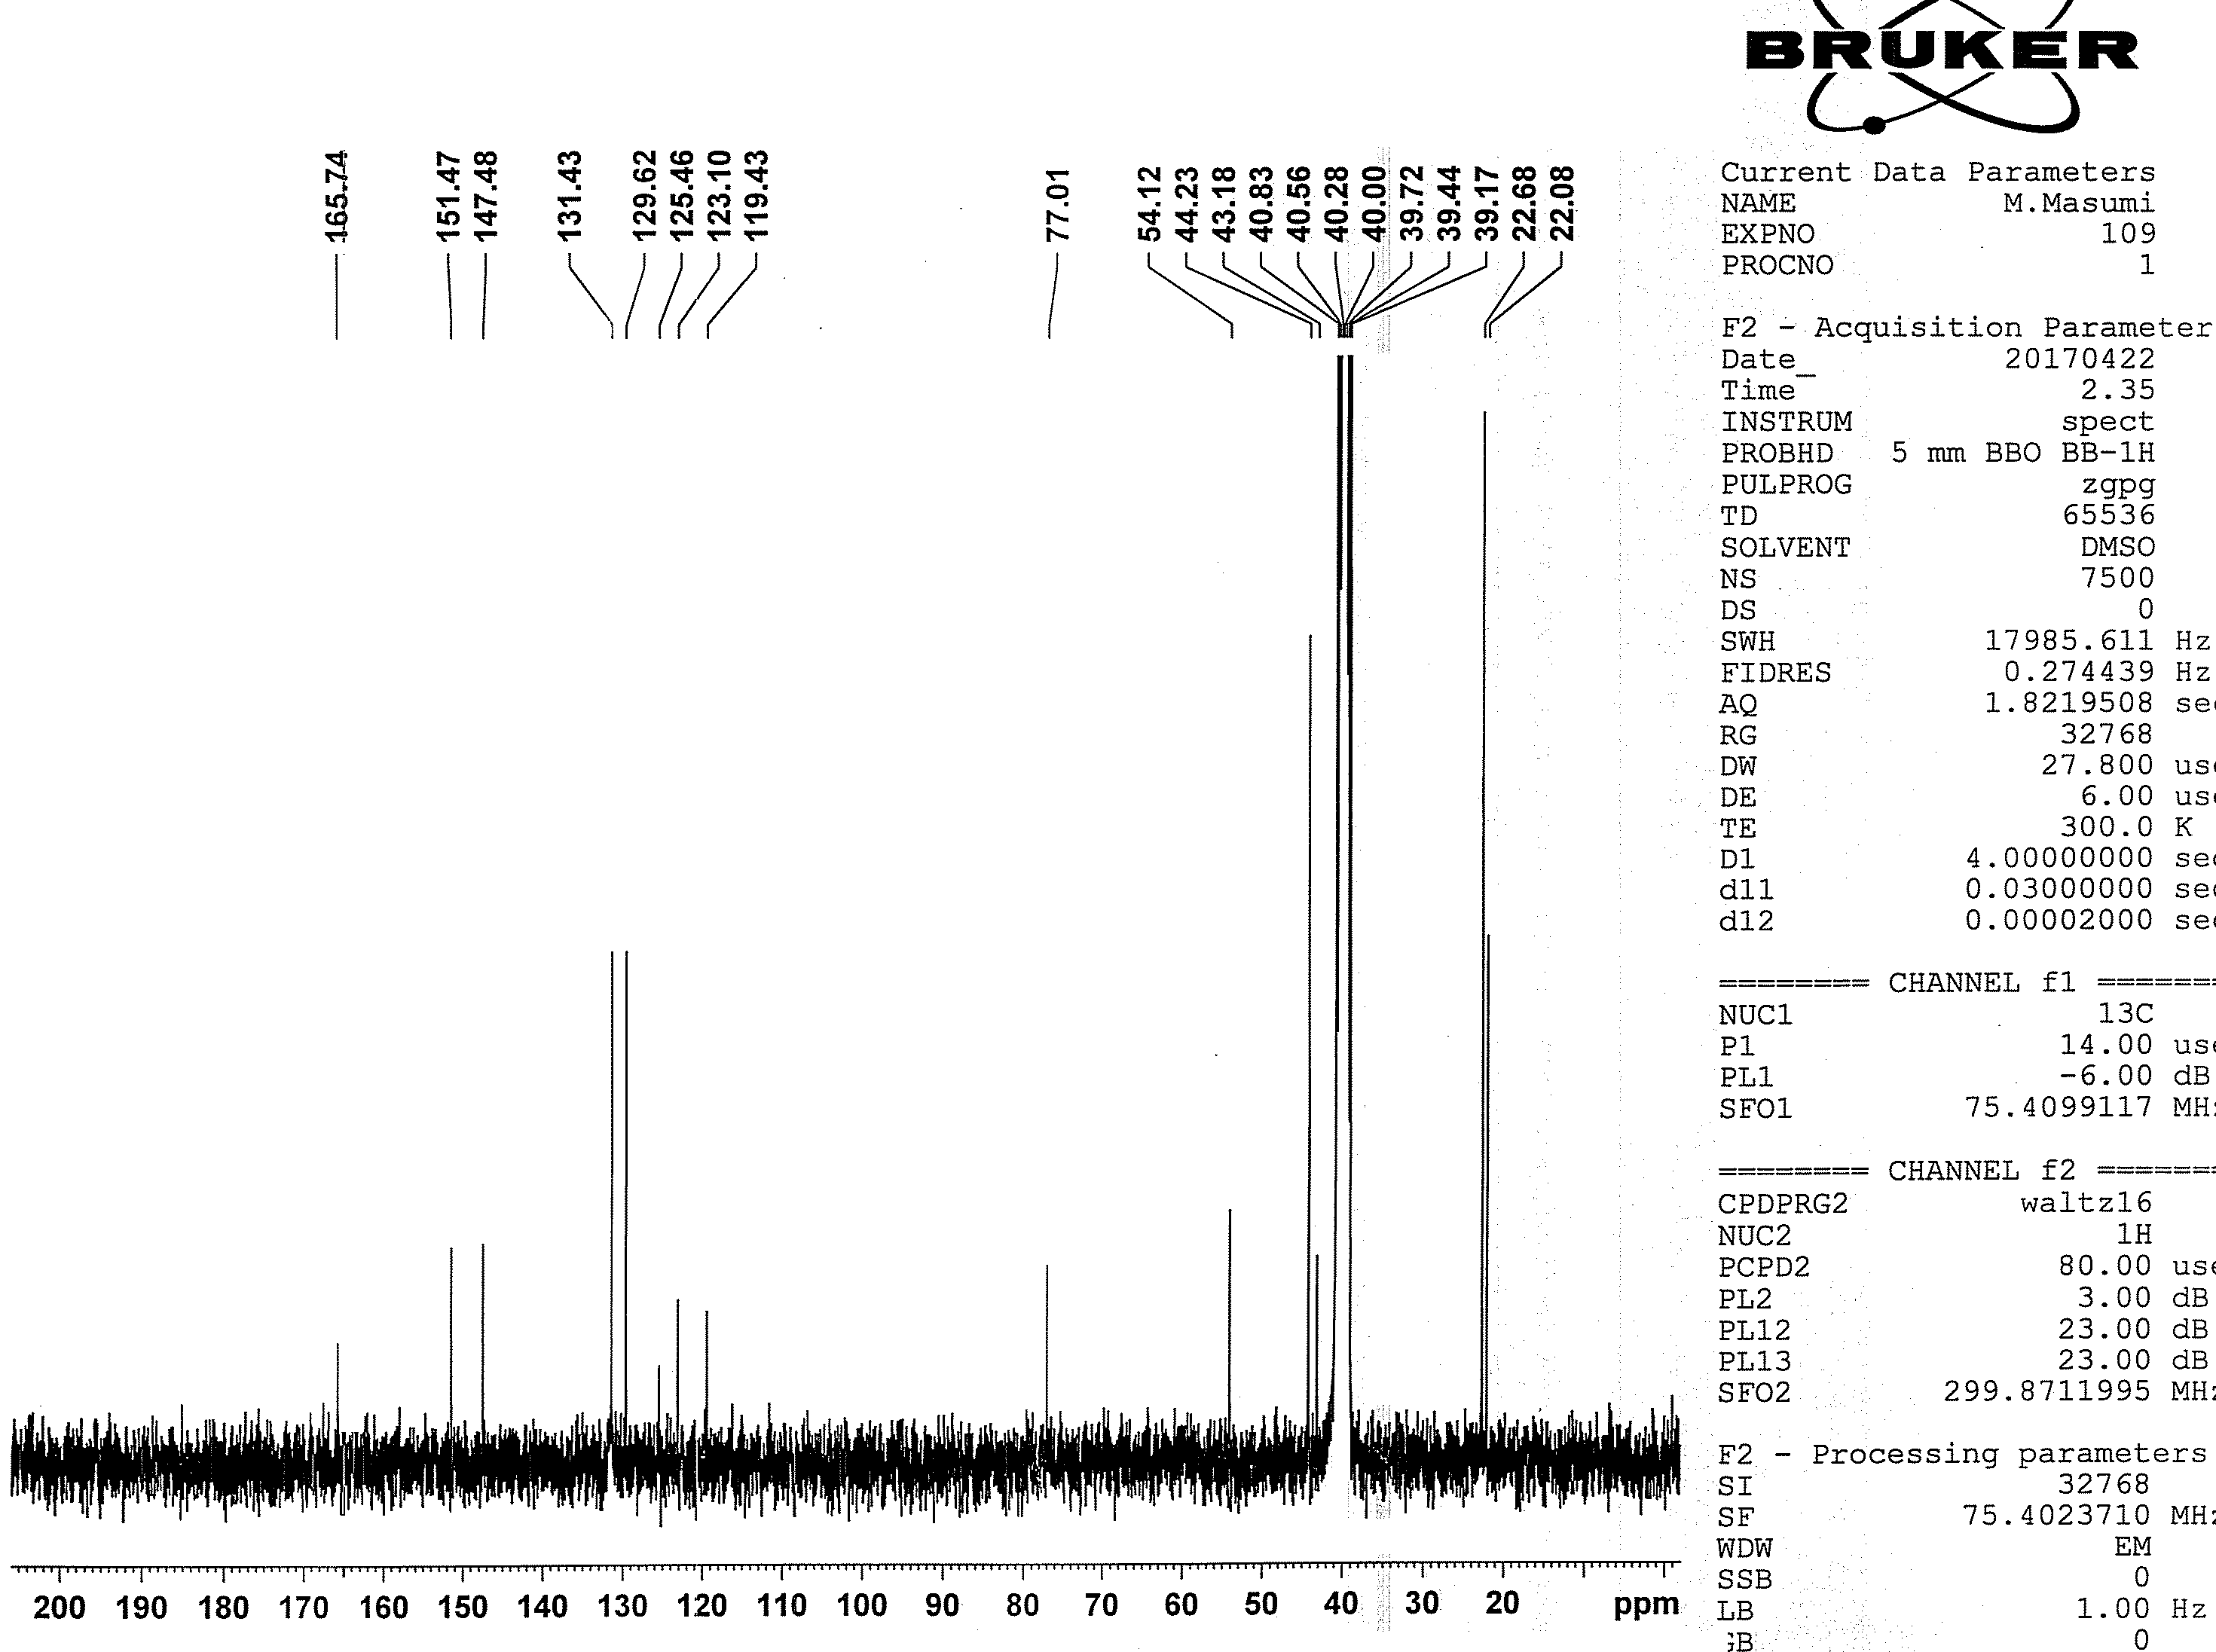


**13C NMR of 4c**


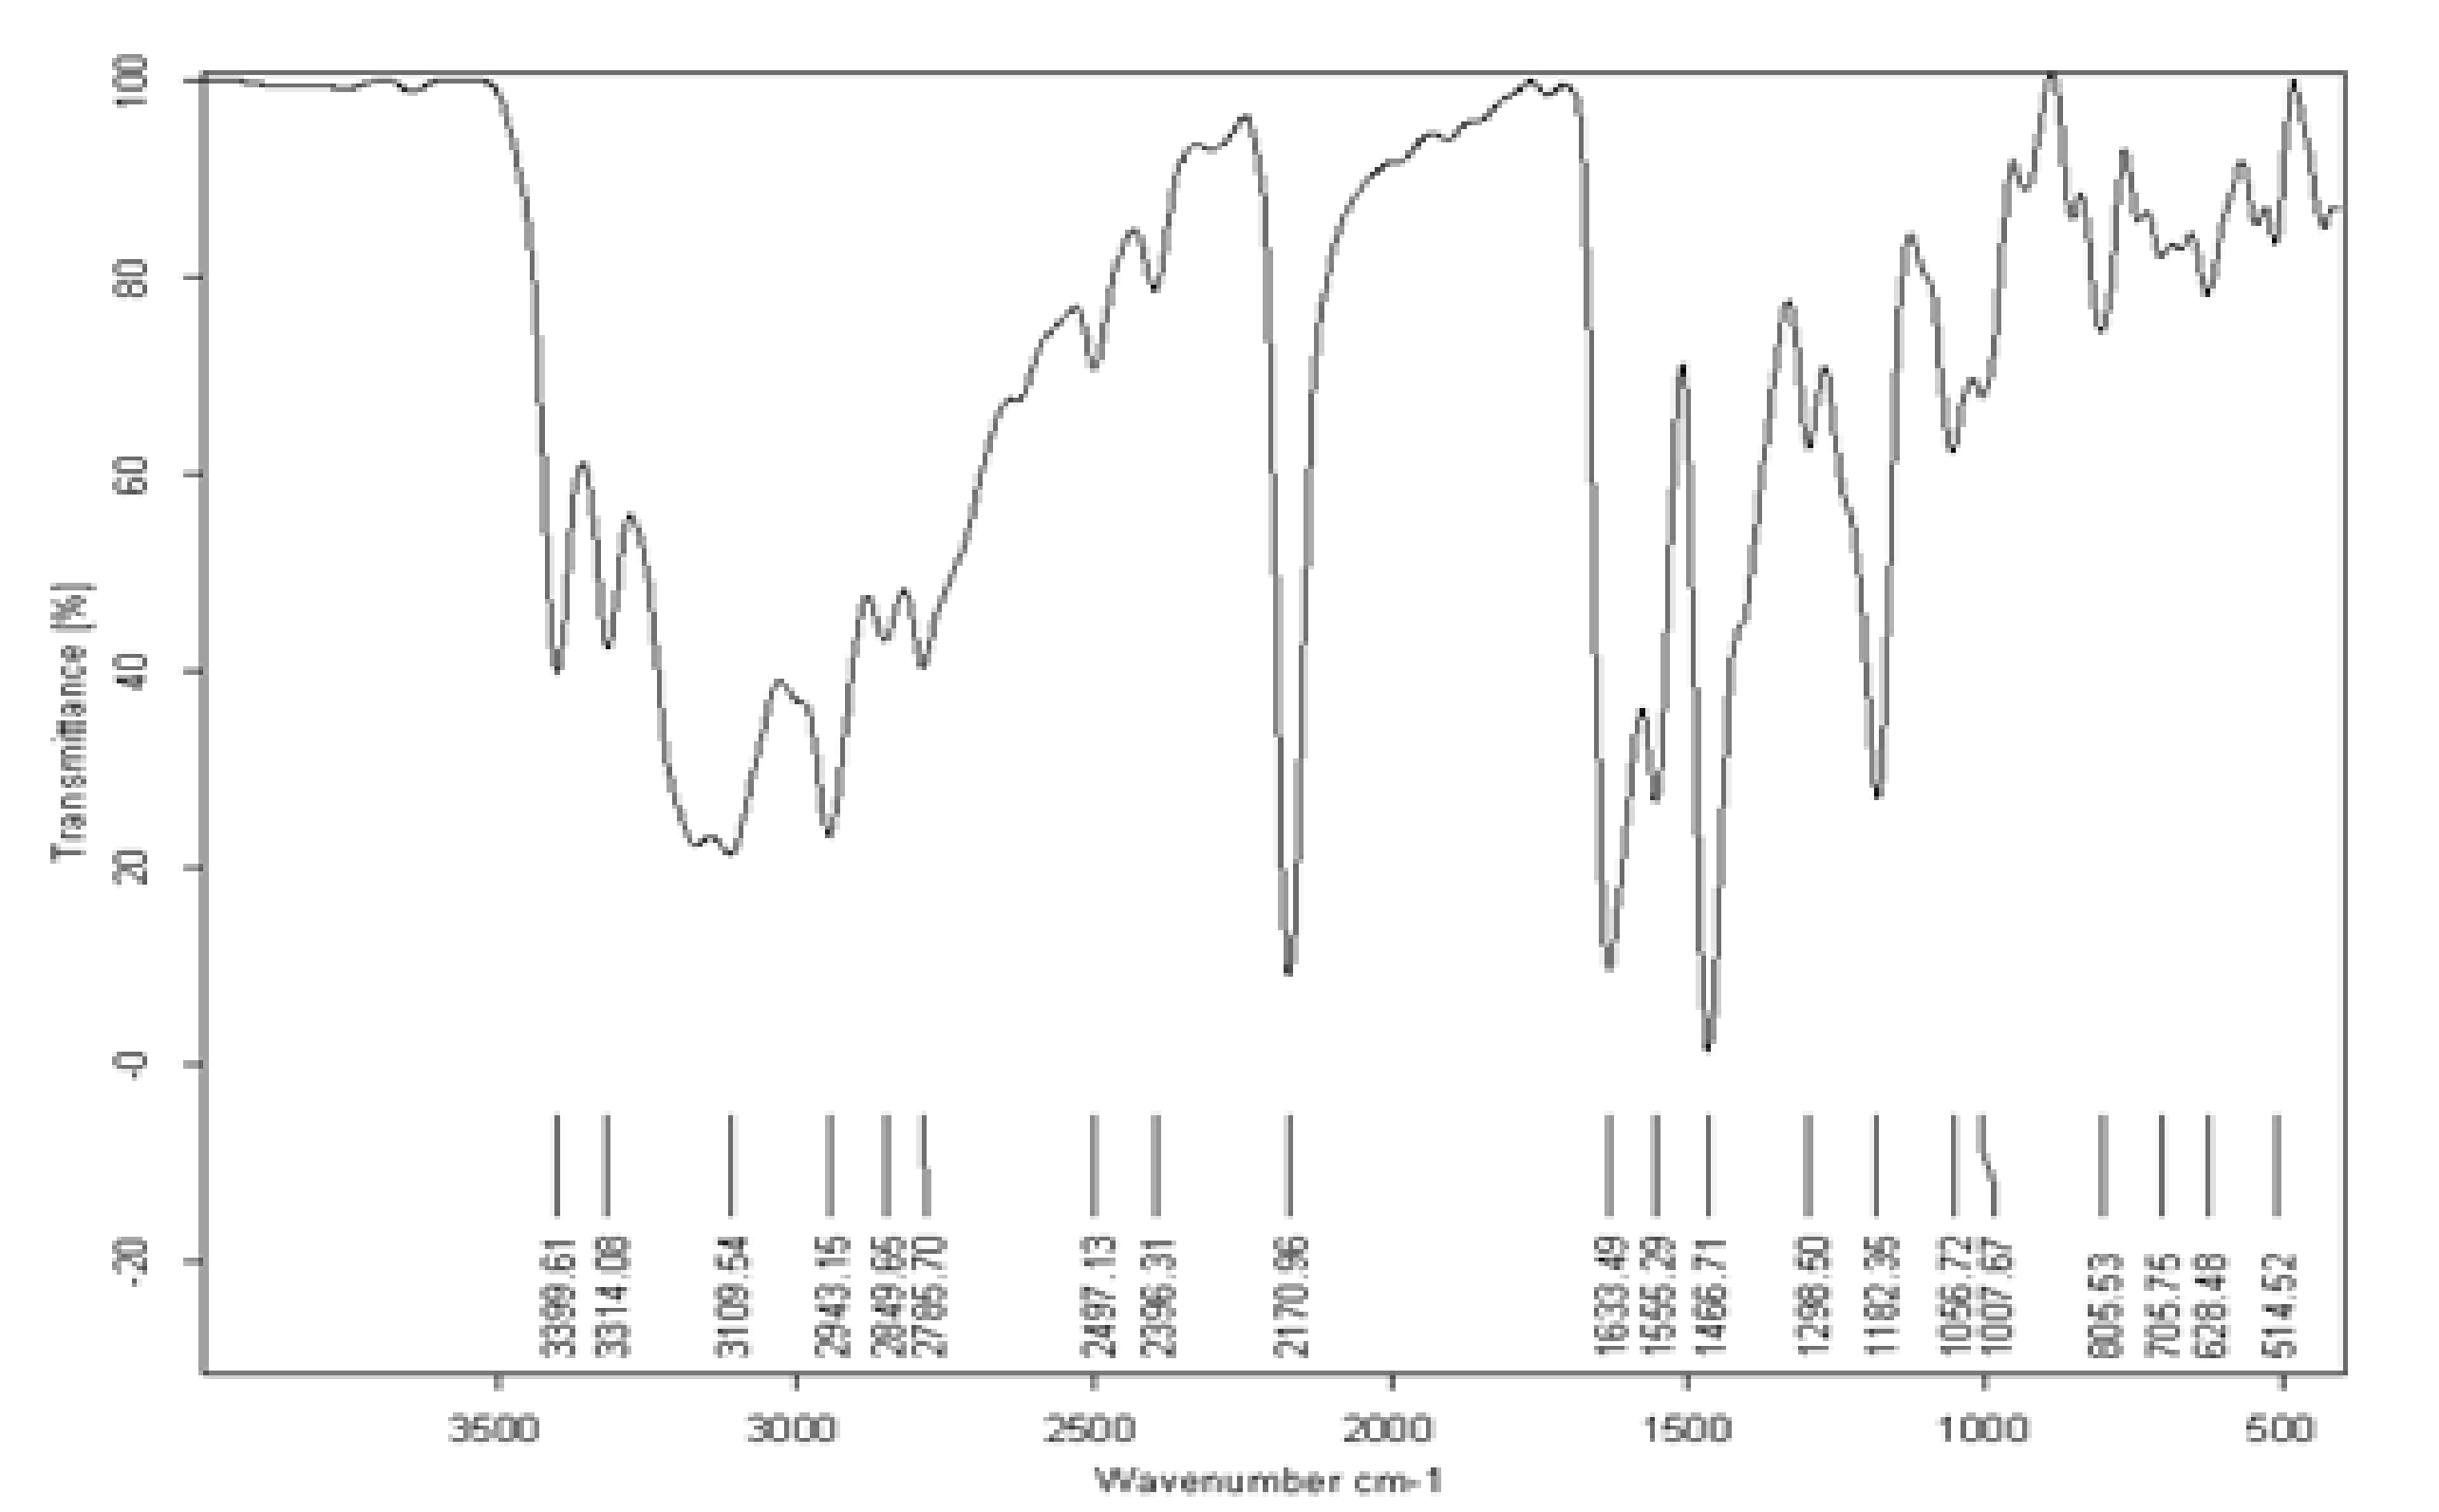


**IR of 4c**


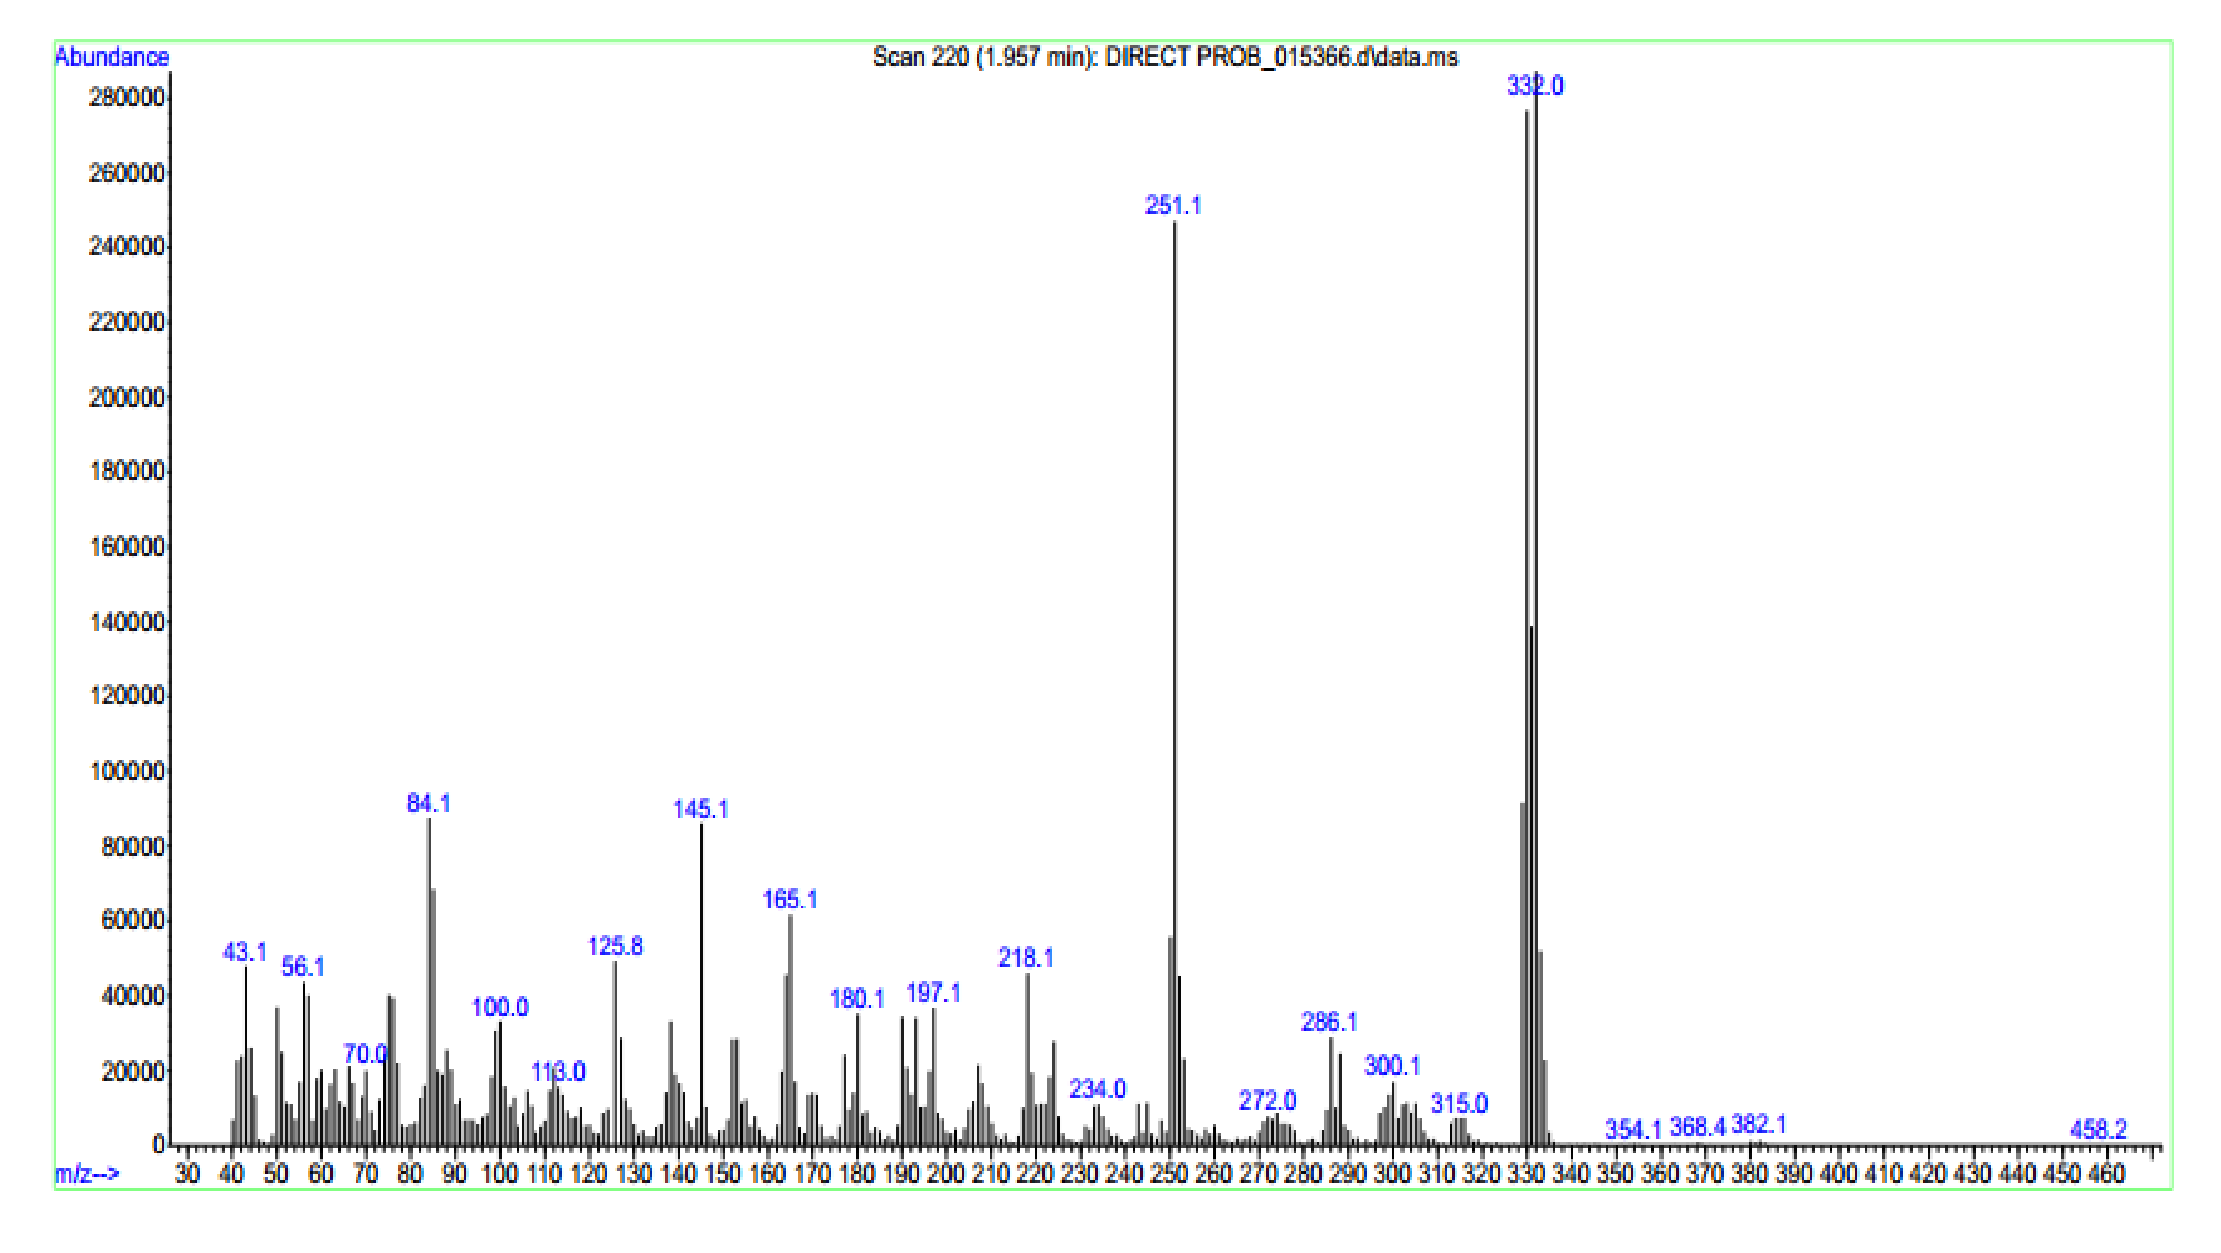


**Mass of 4c**


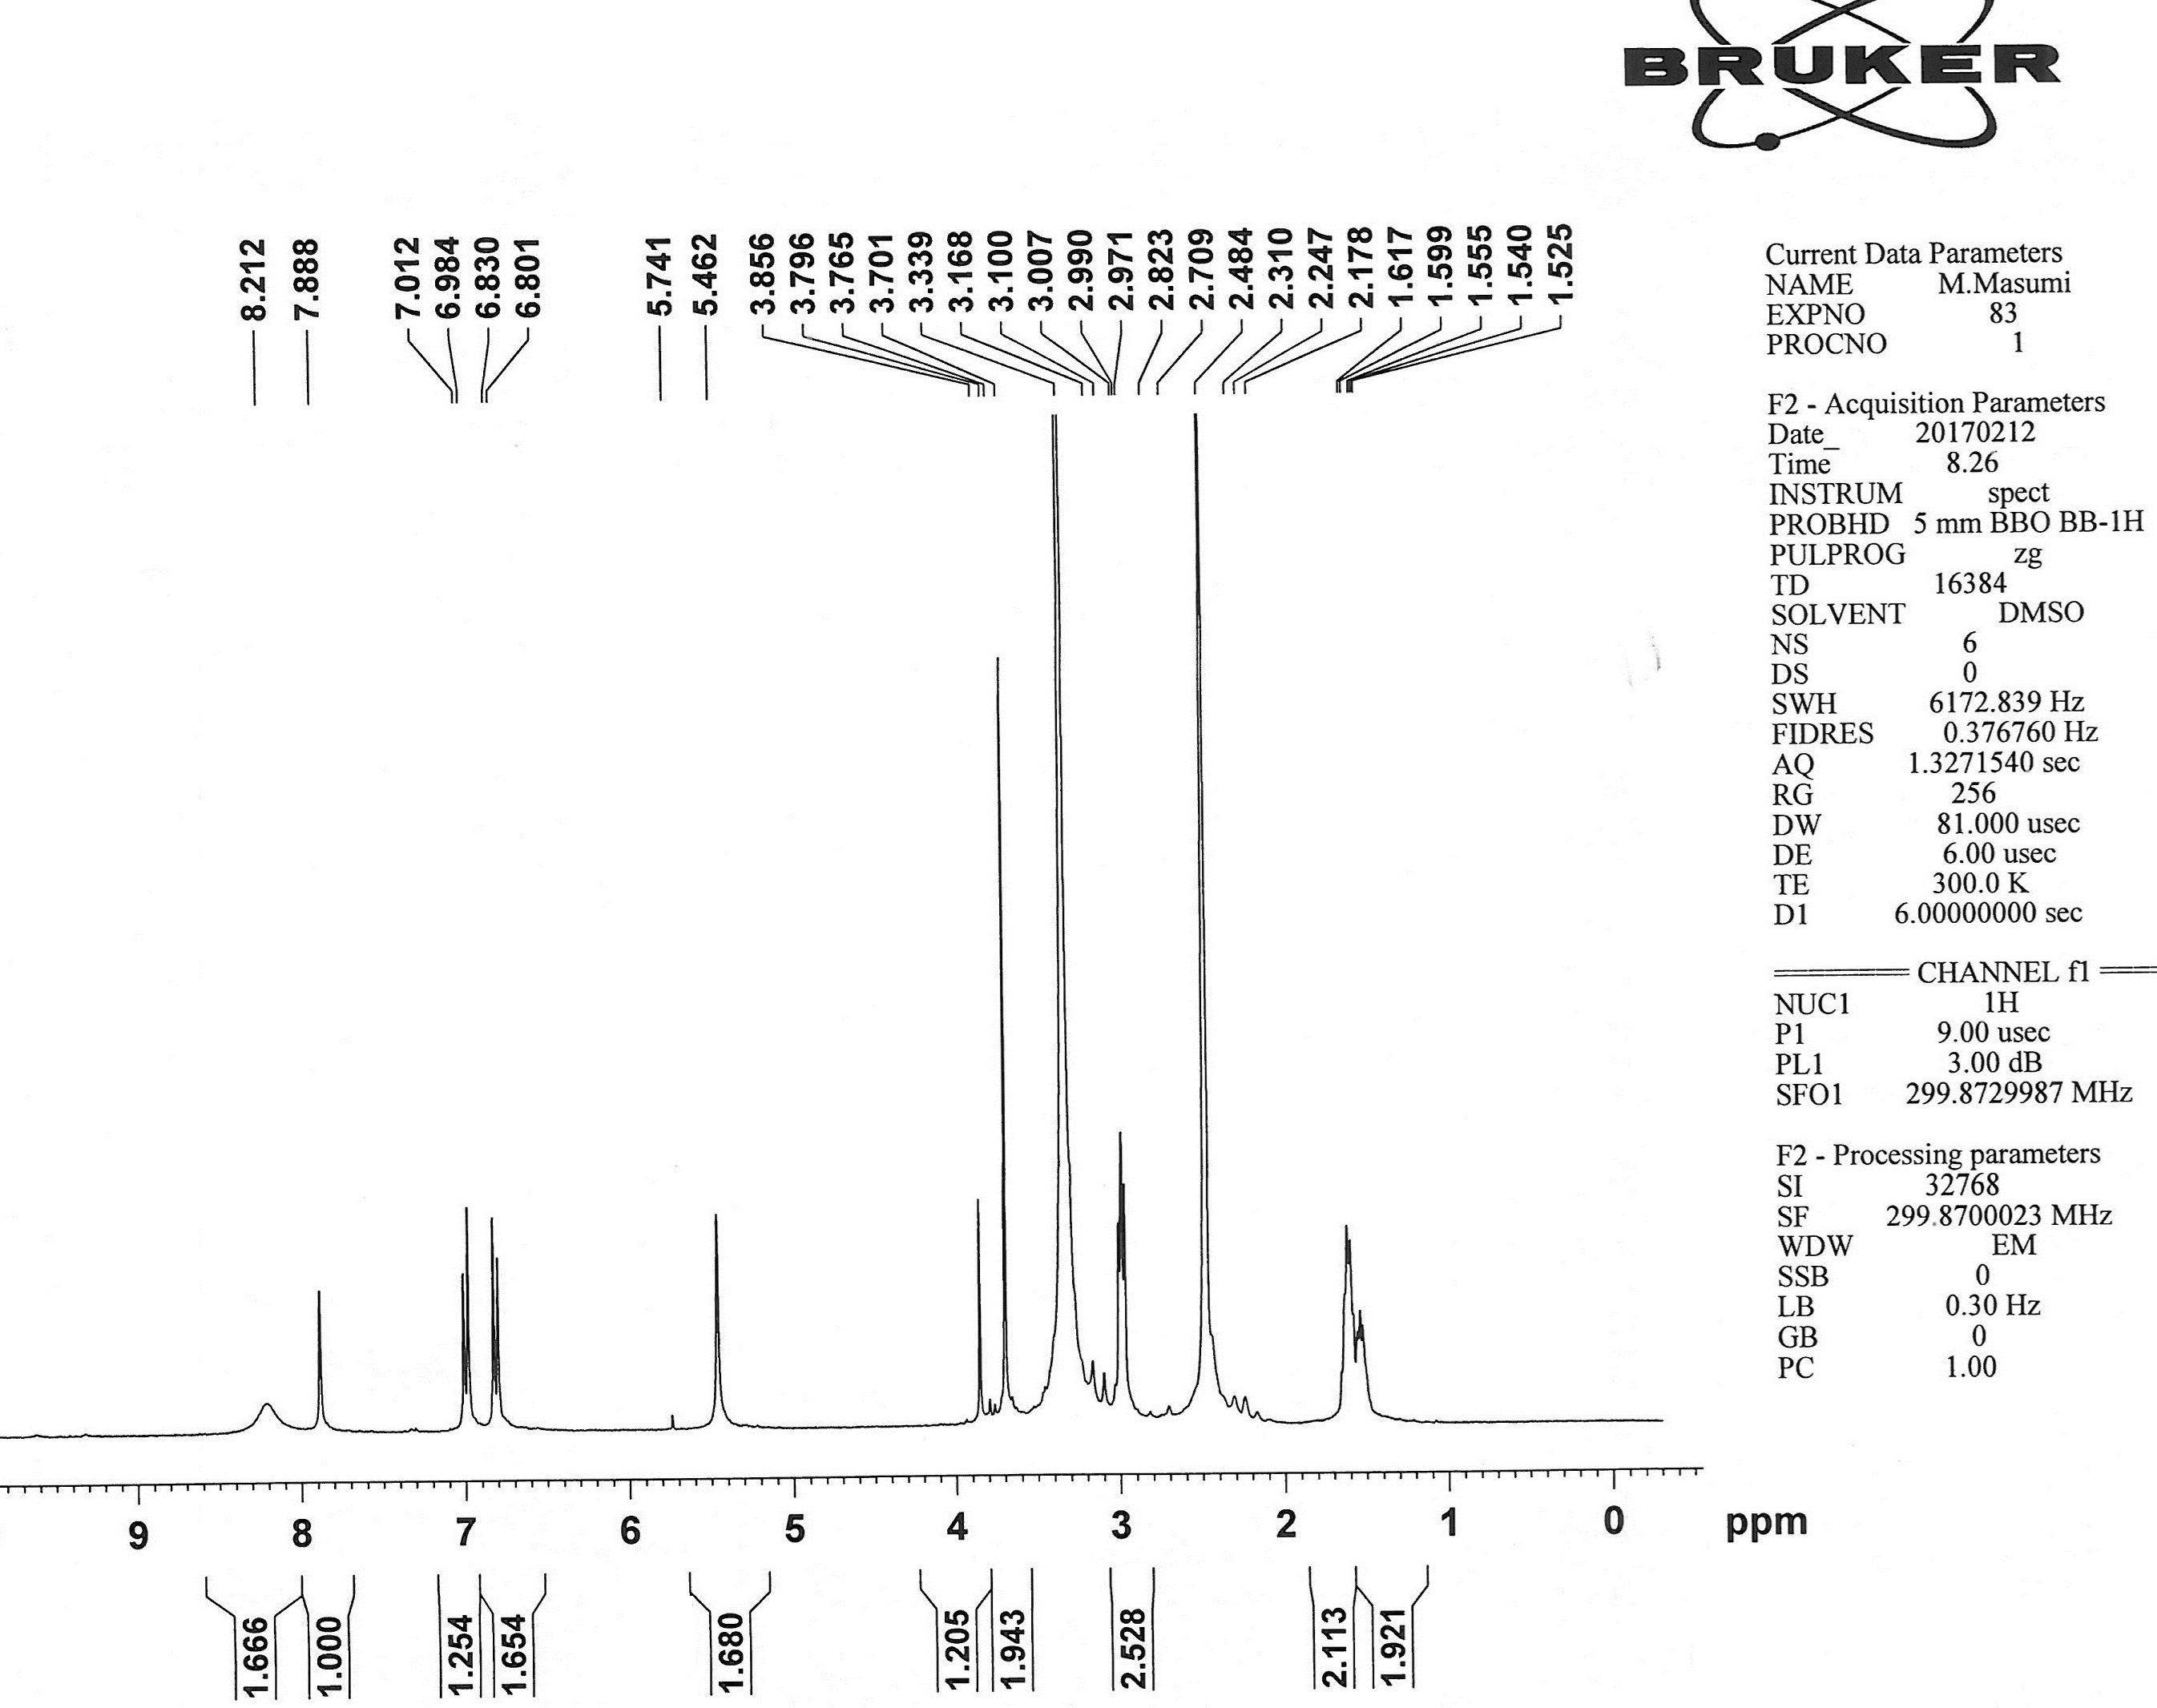


**1H NMR of 4d**


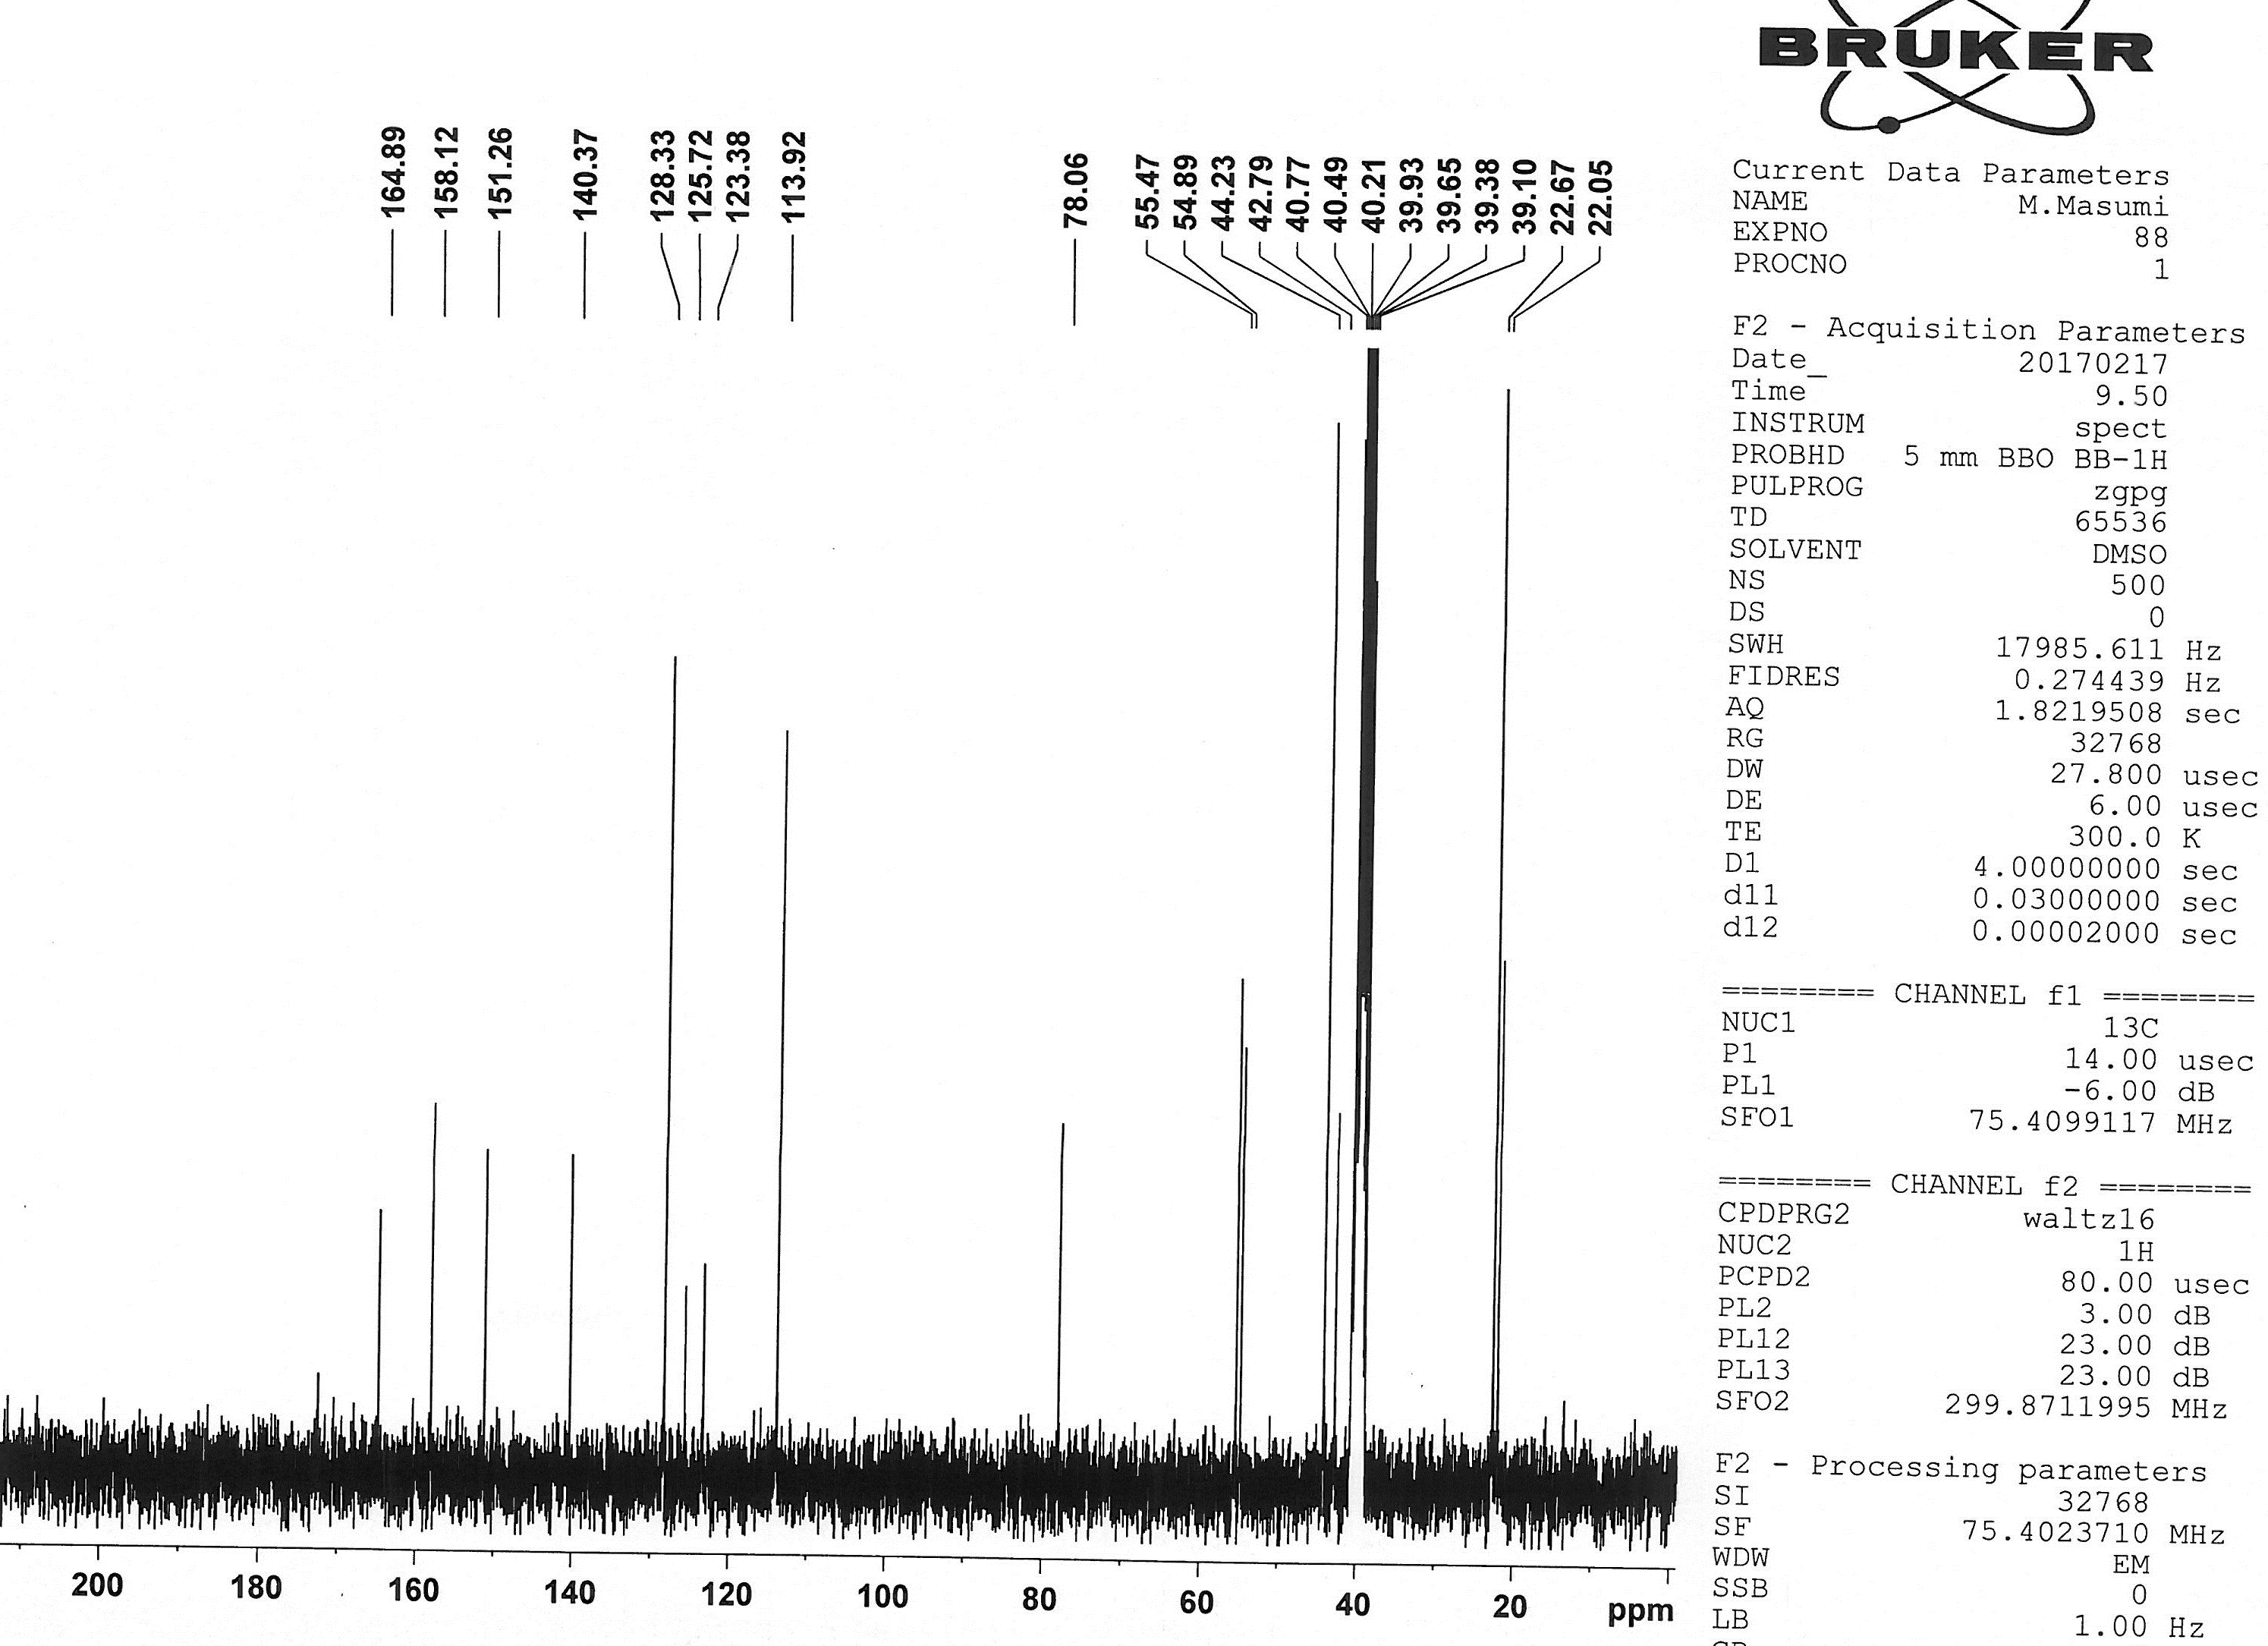


**13C NMR of 4d**


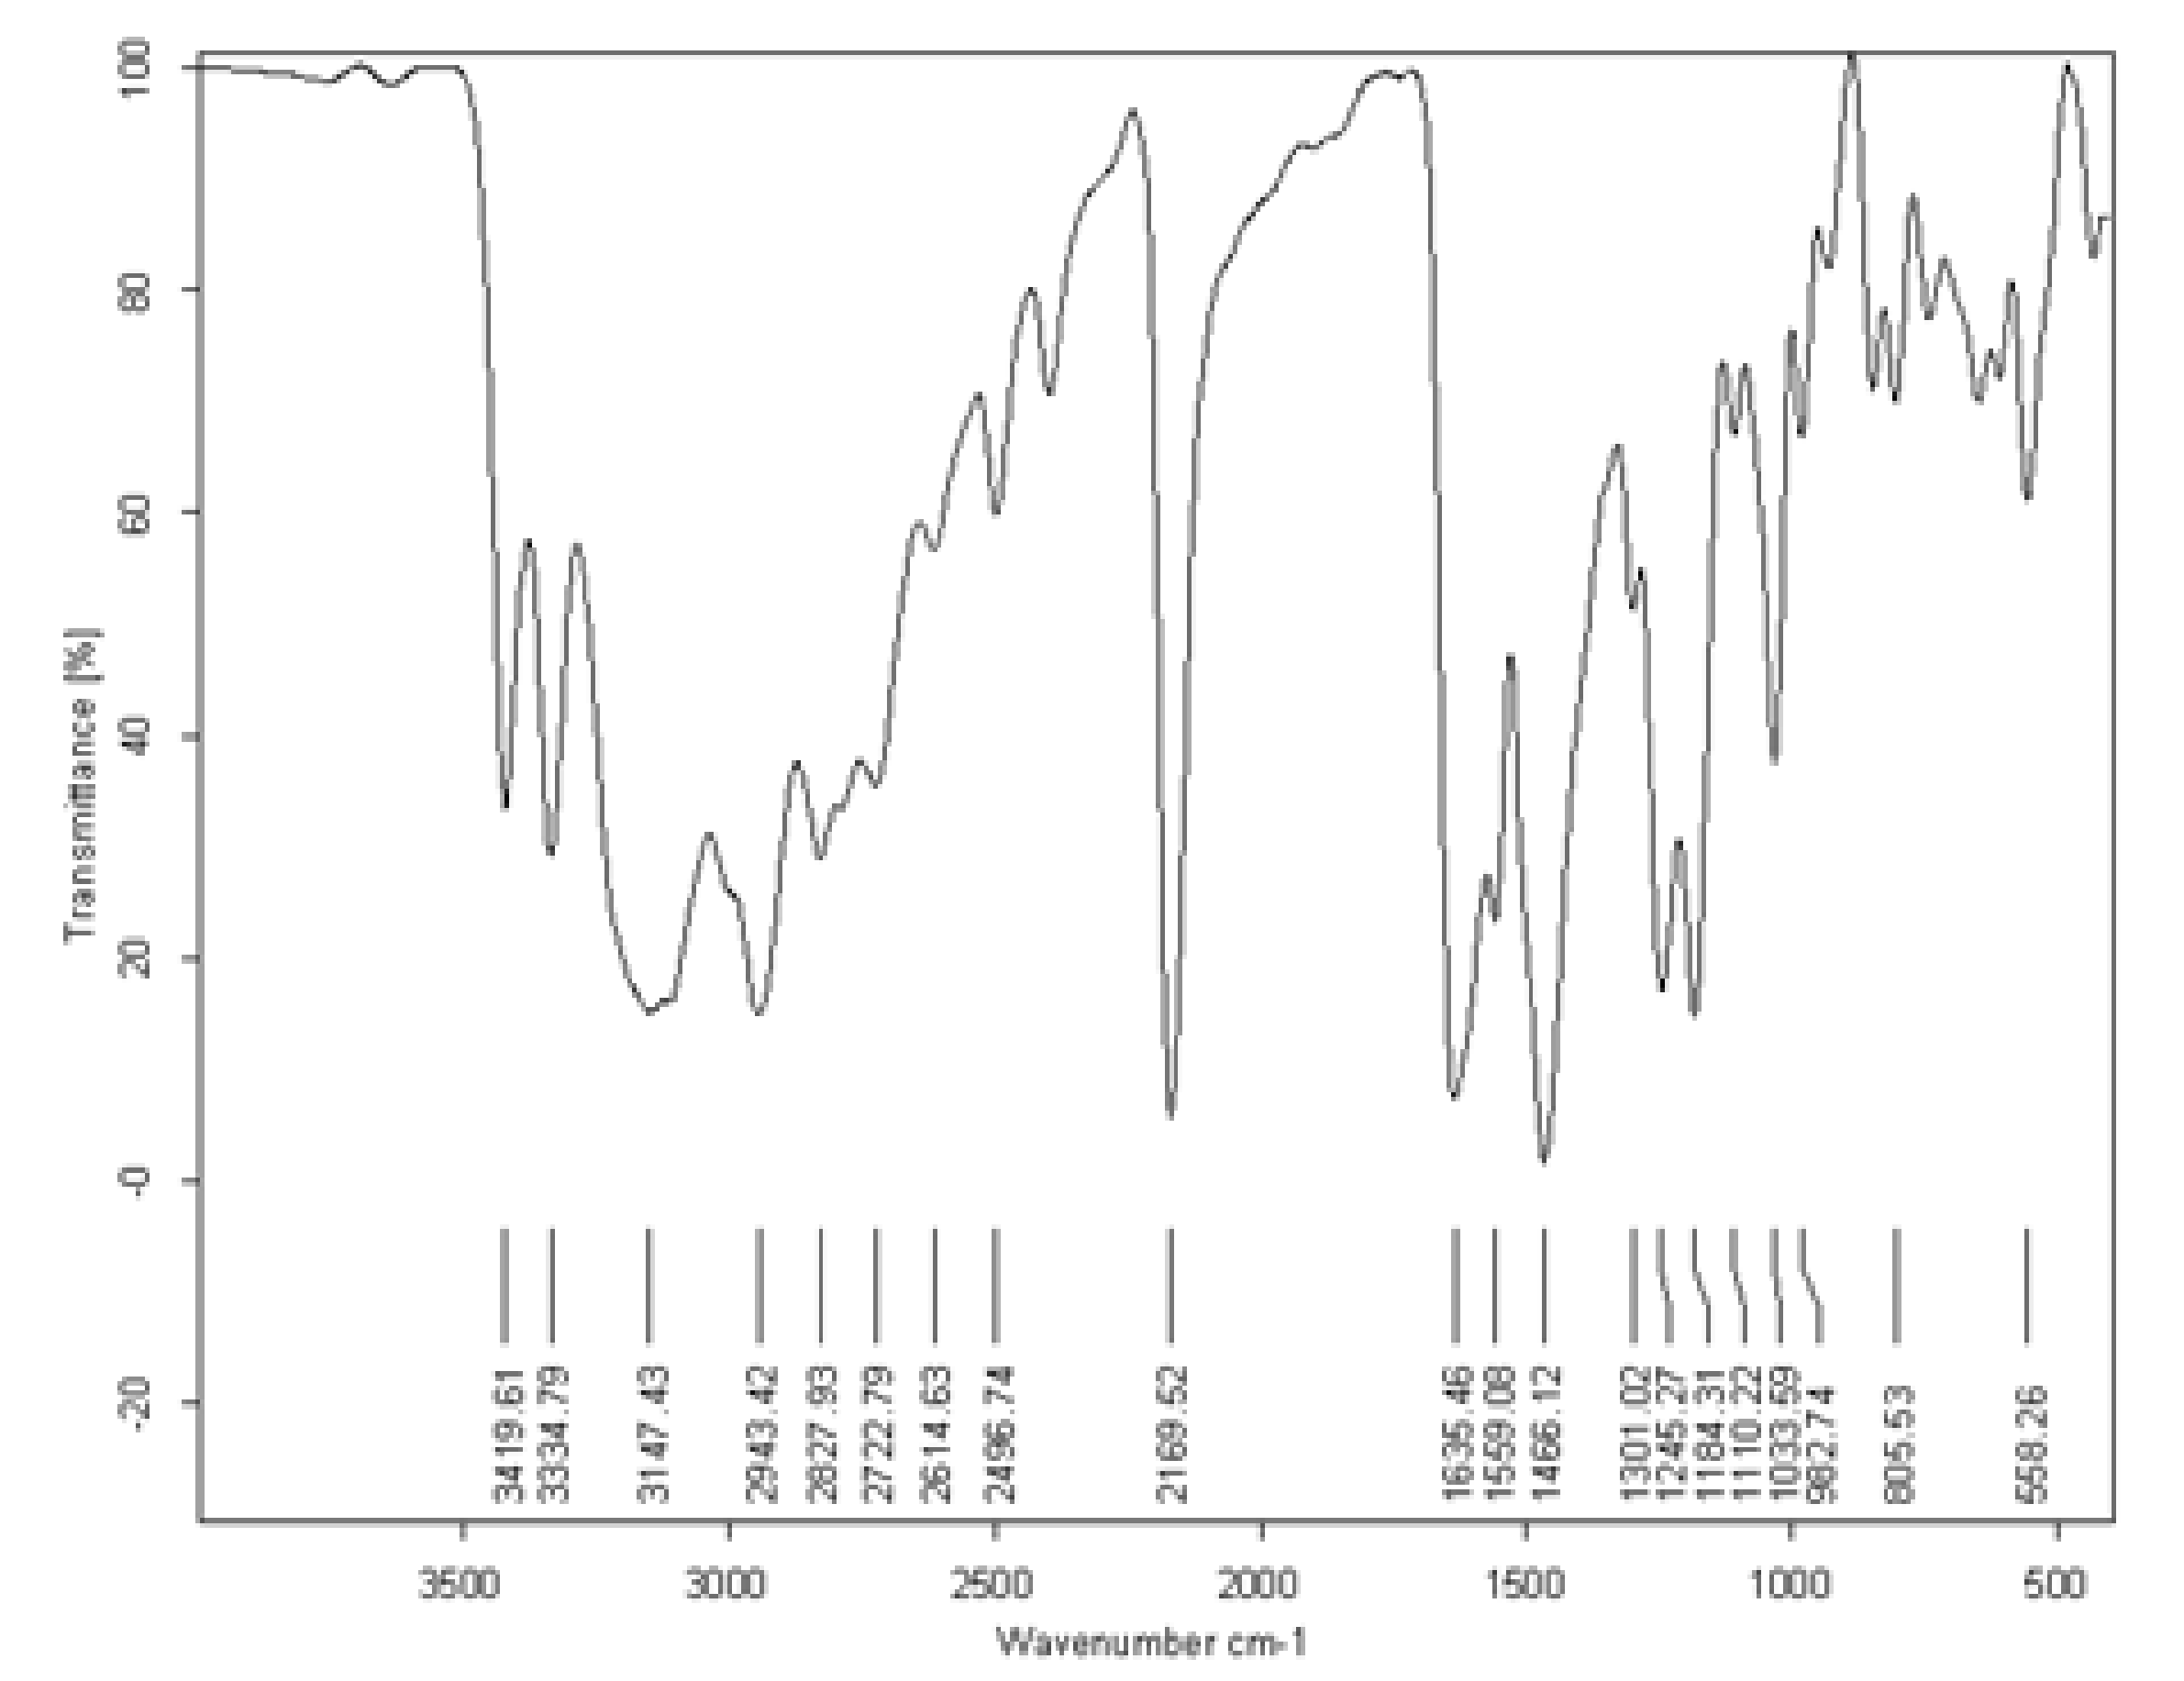


**IR of 4d**


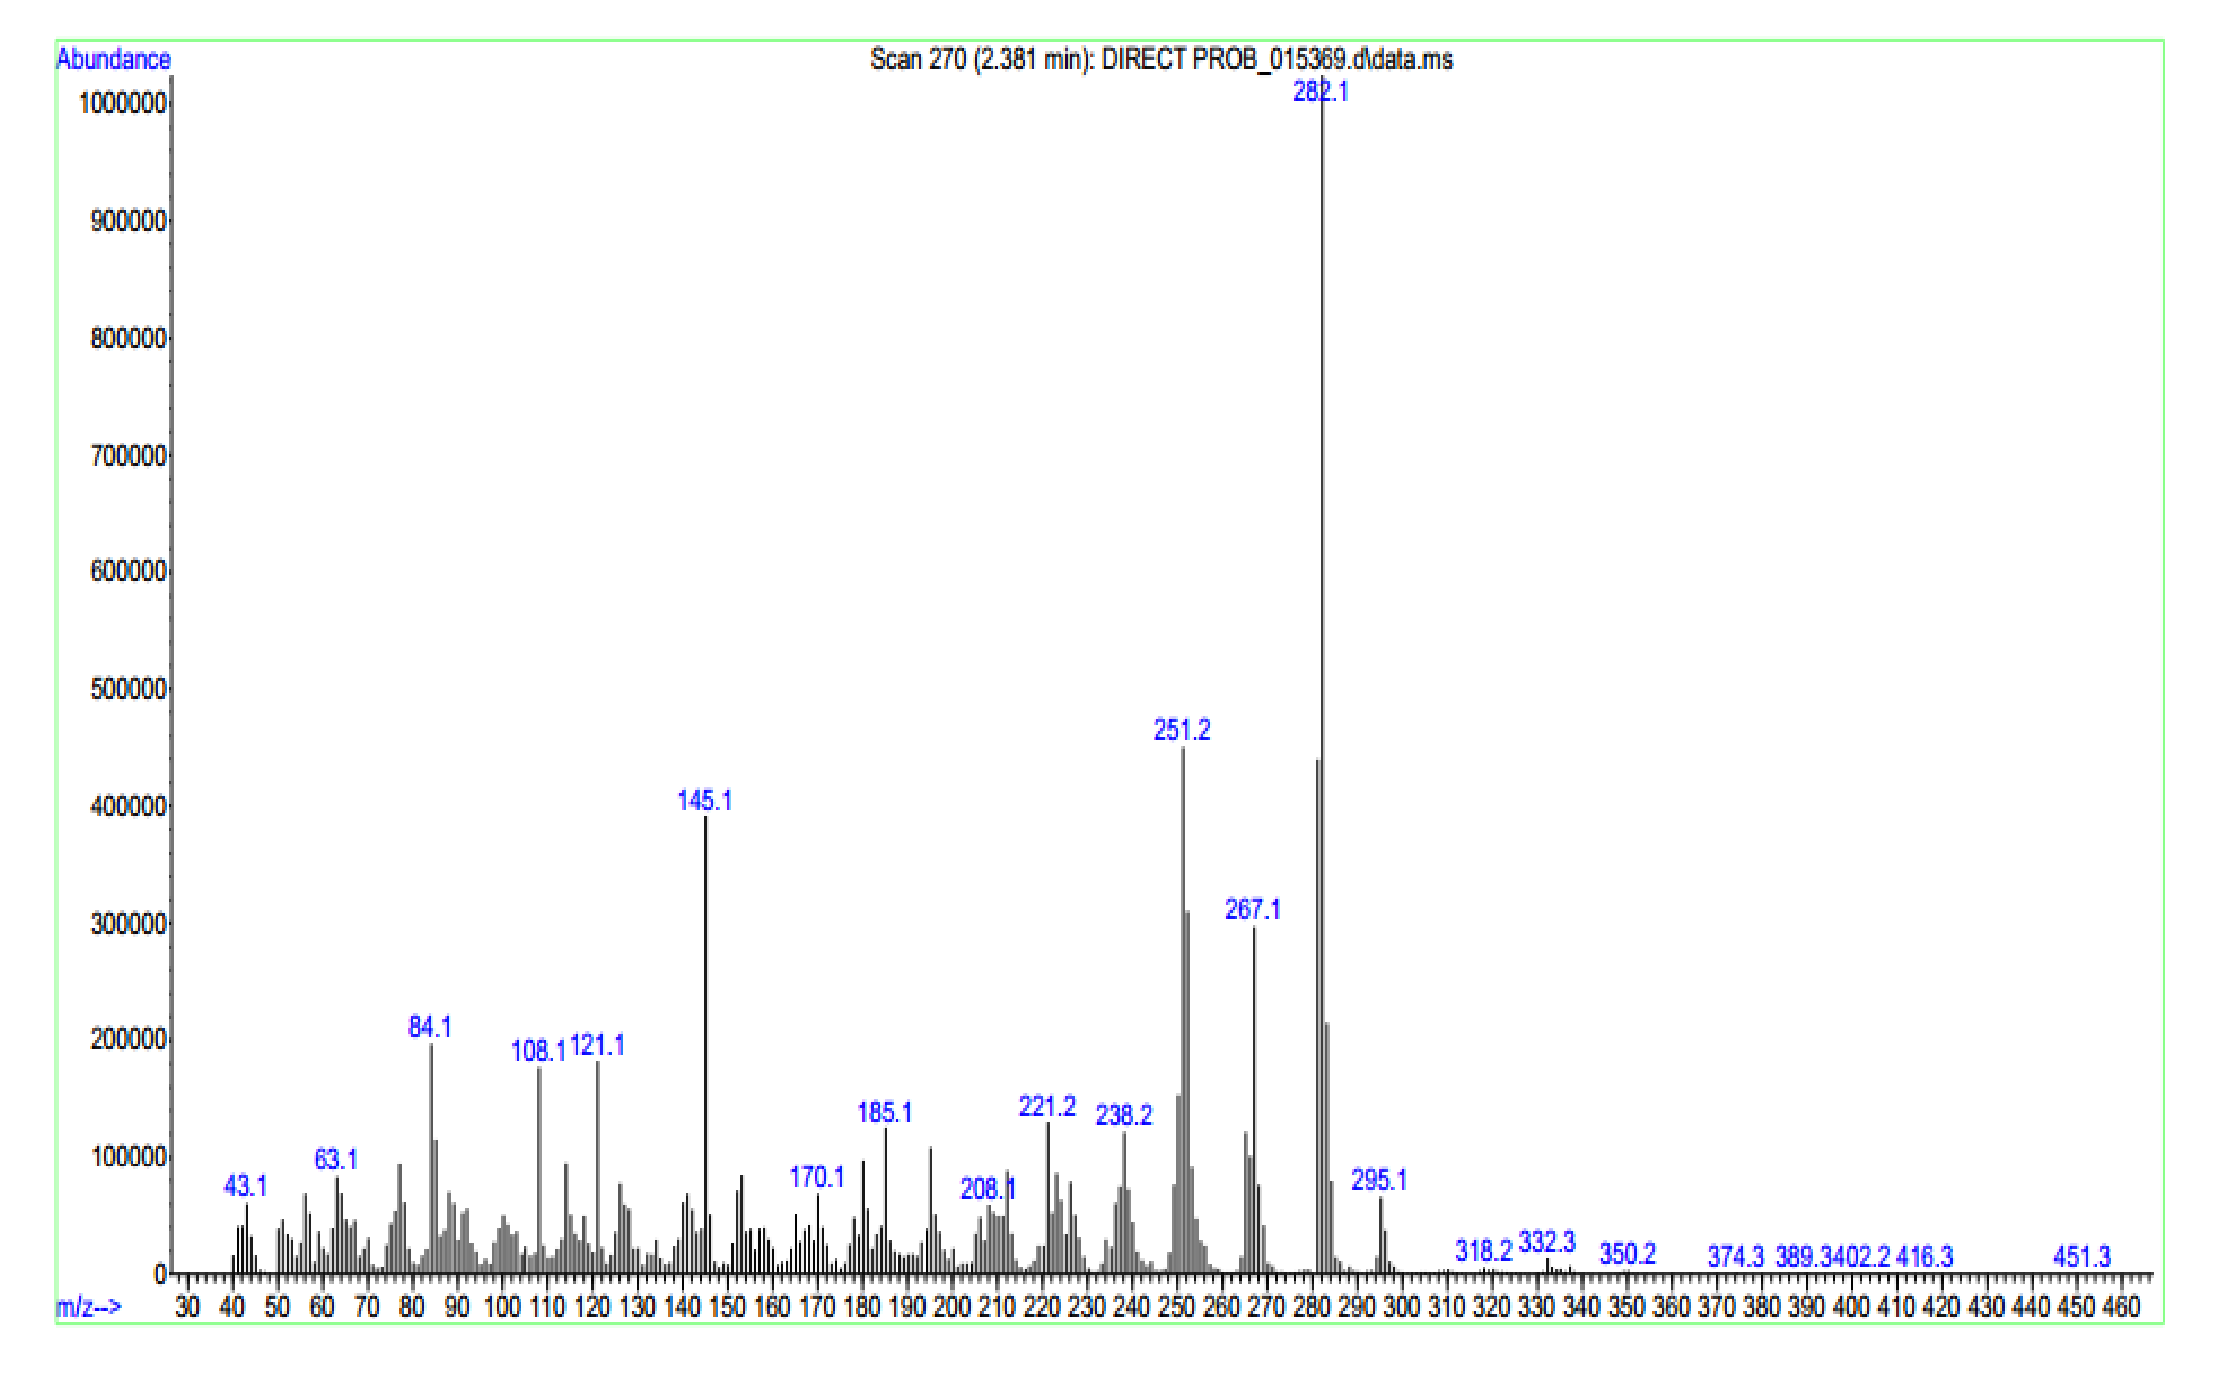


**Mass of 4d**


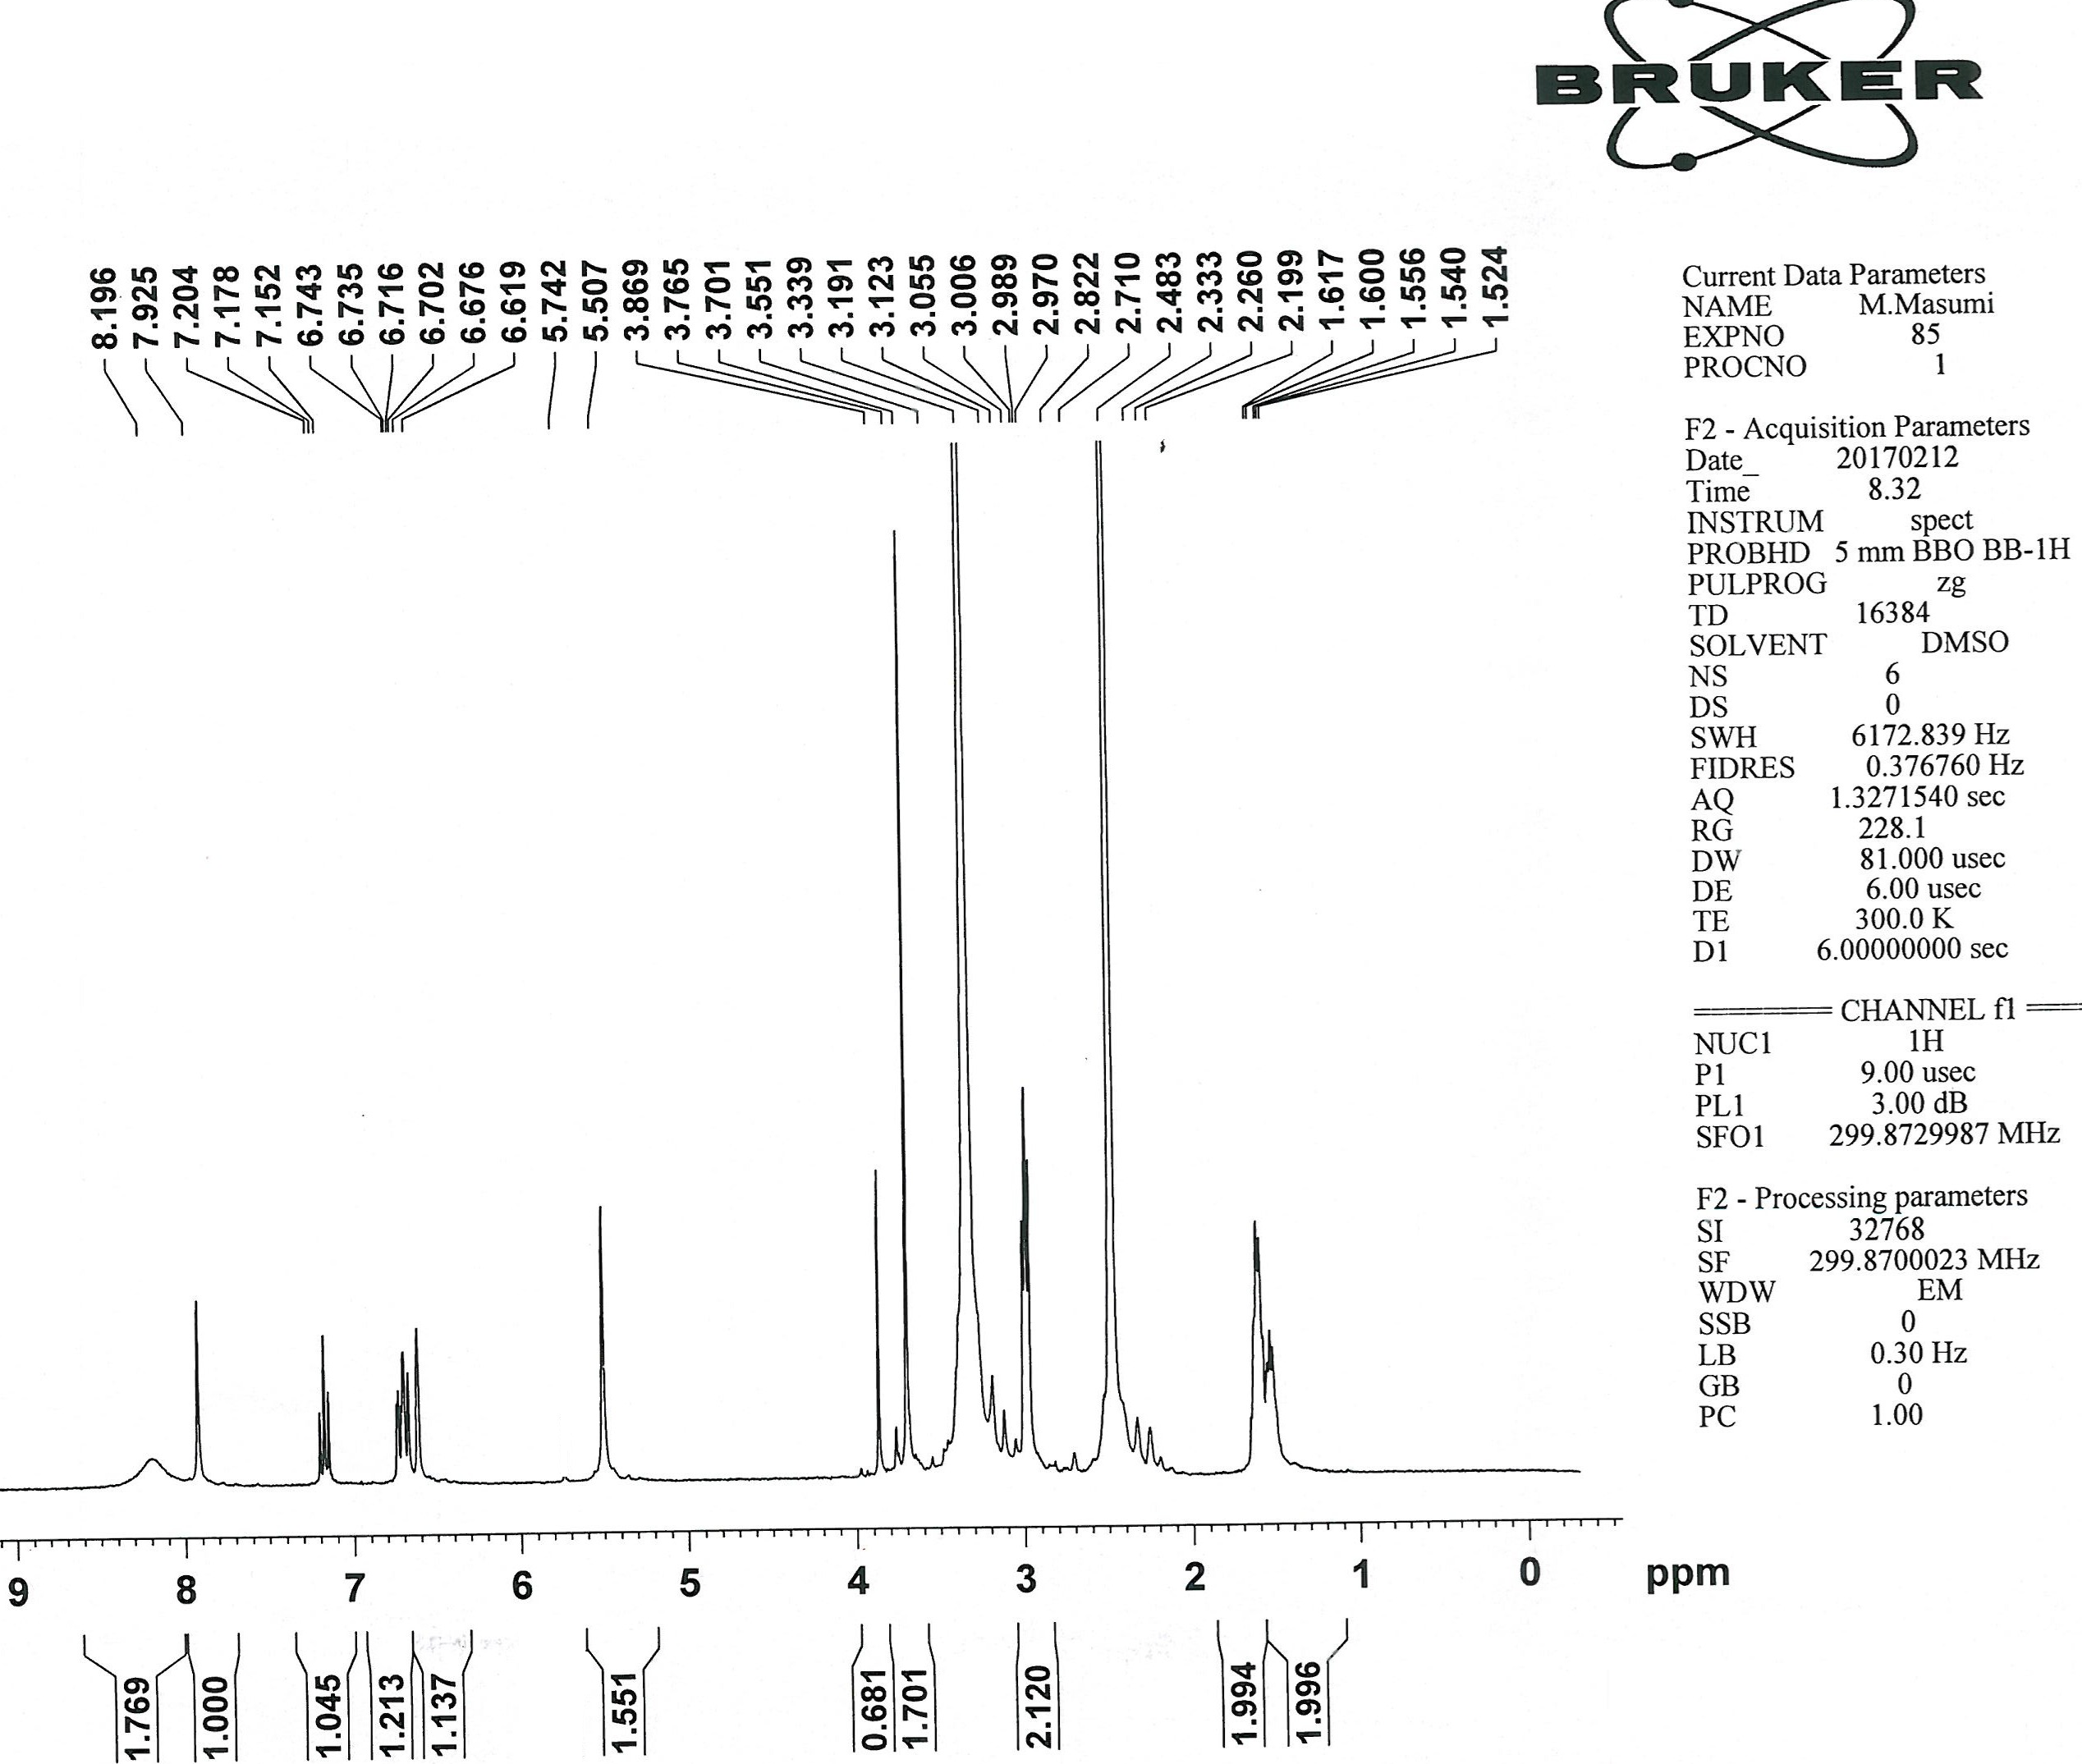


**1H NMR of 4e**


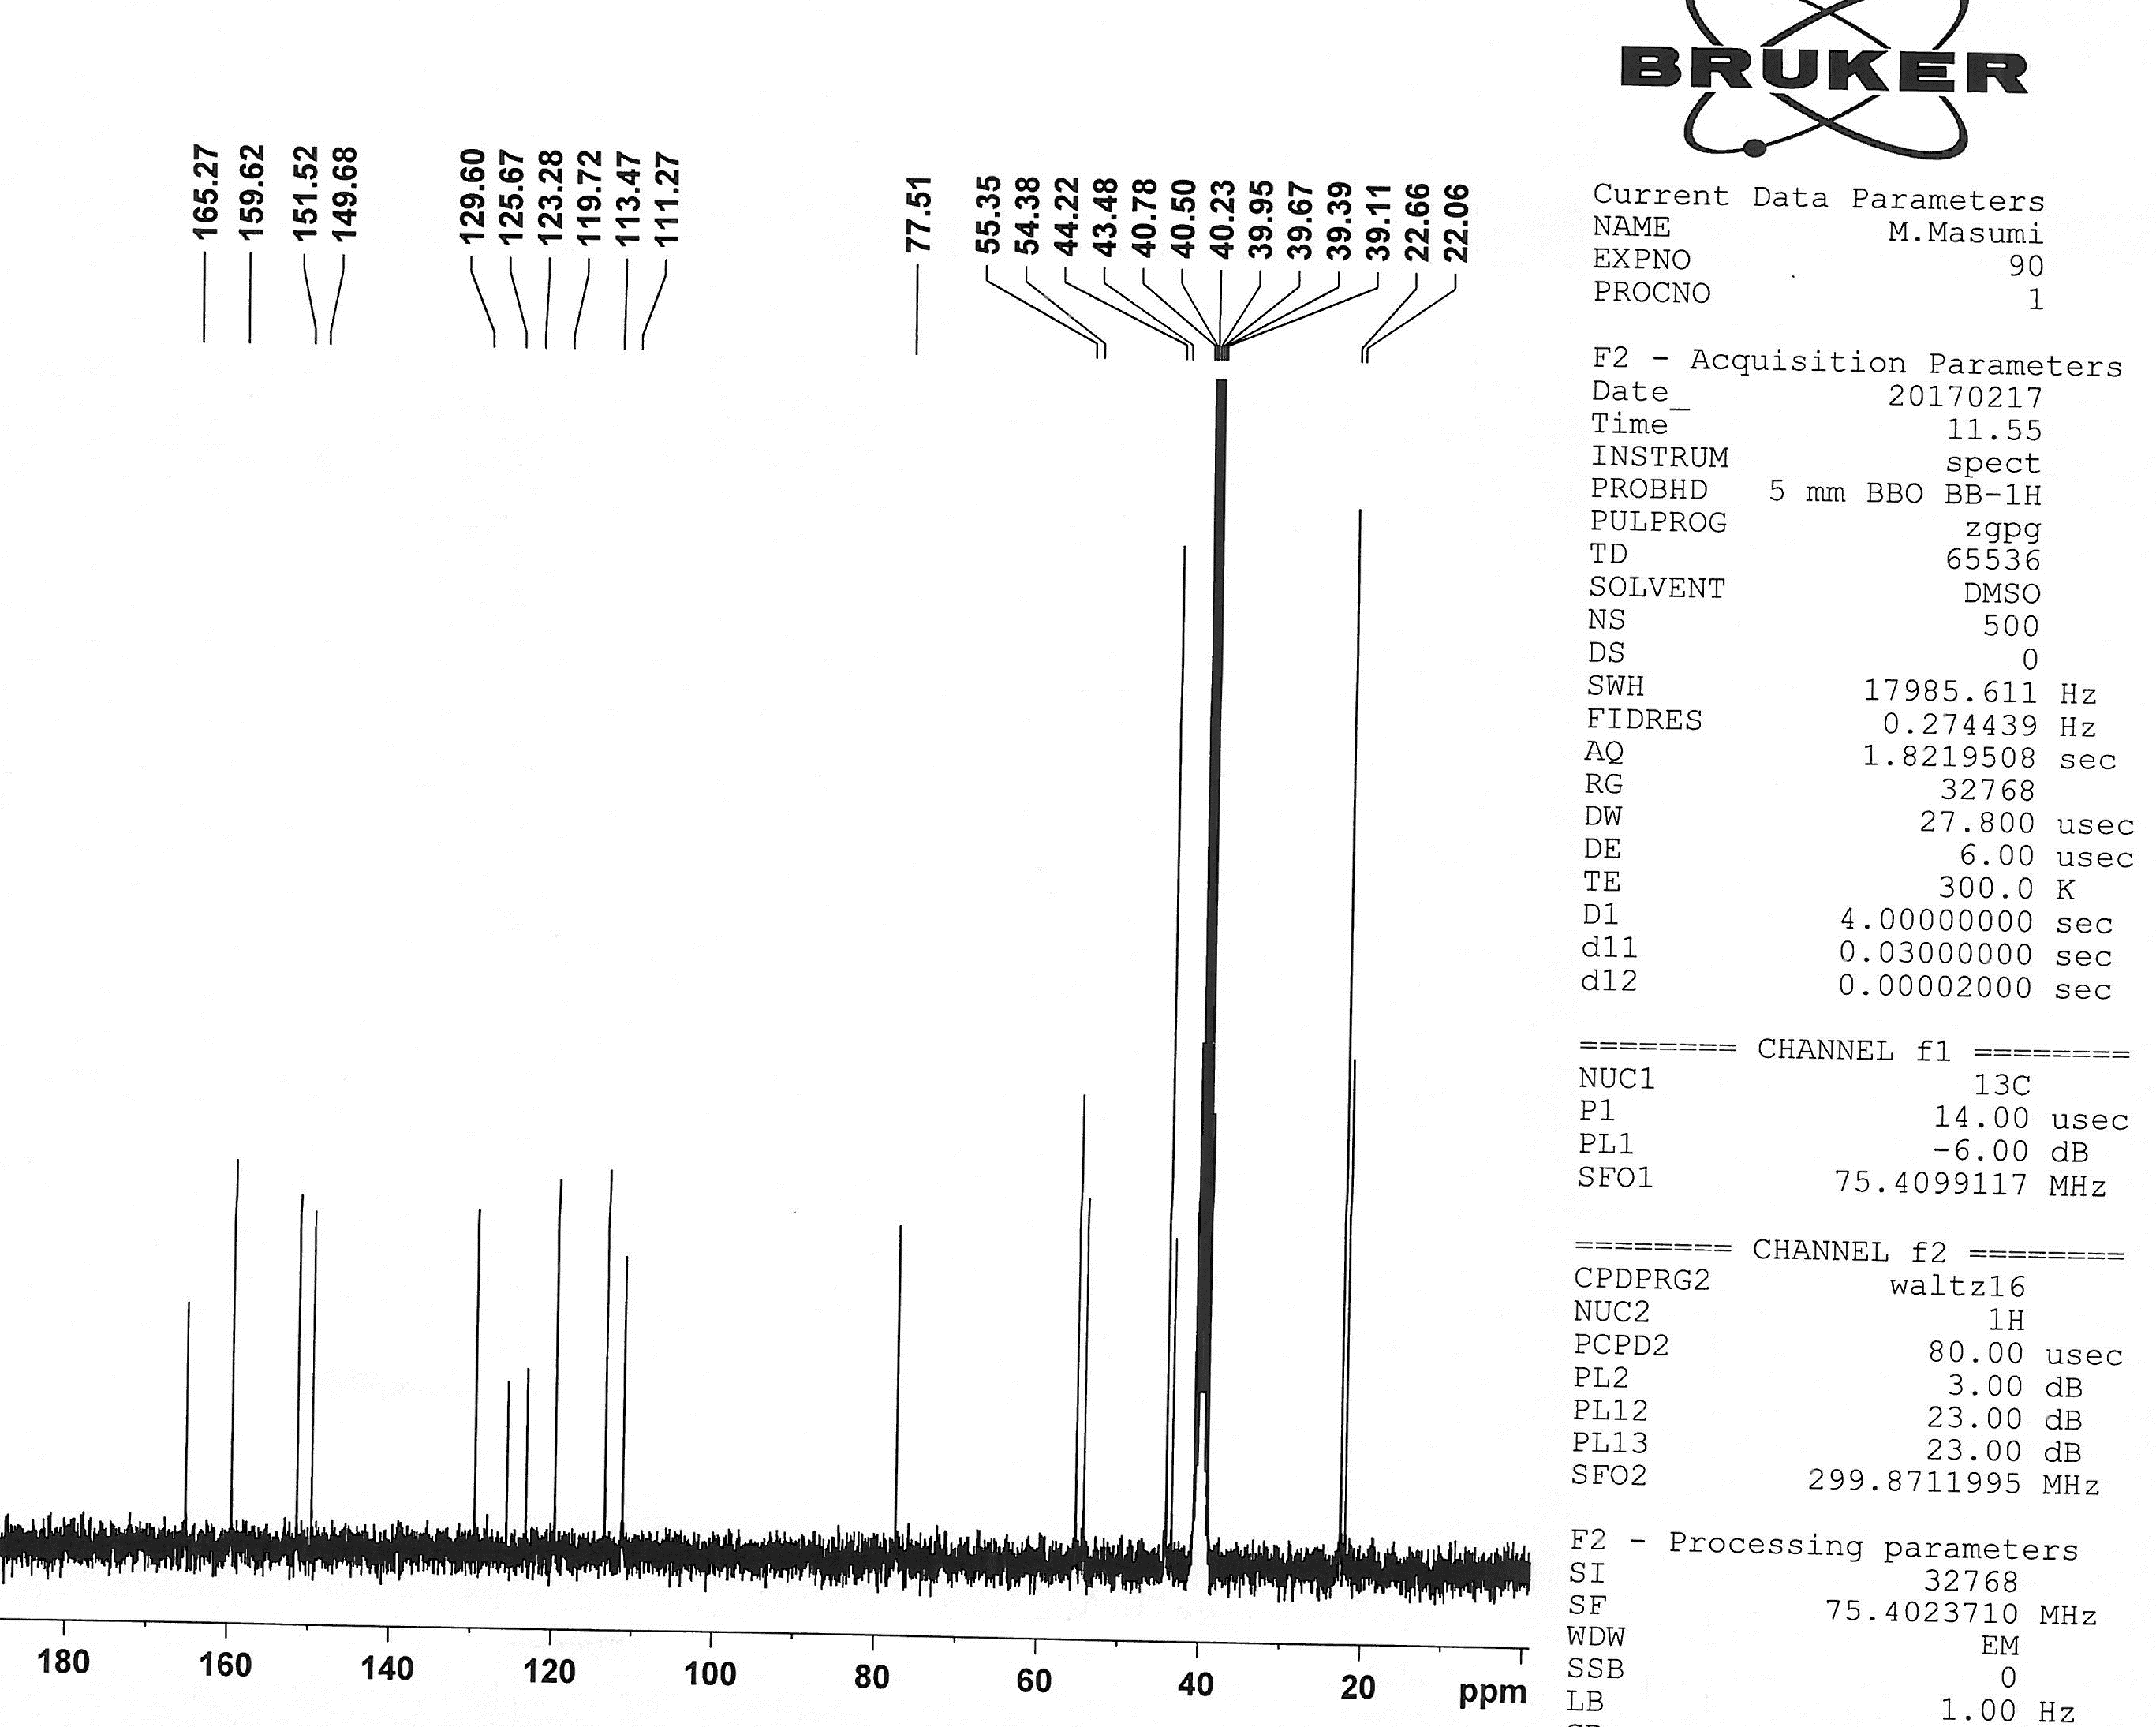


**13C NMR of 4e**


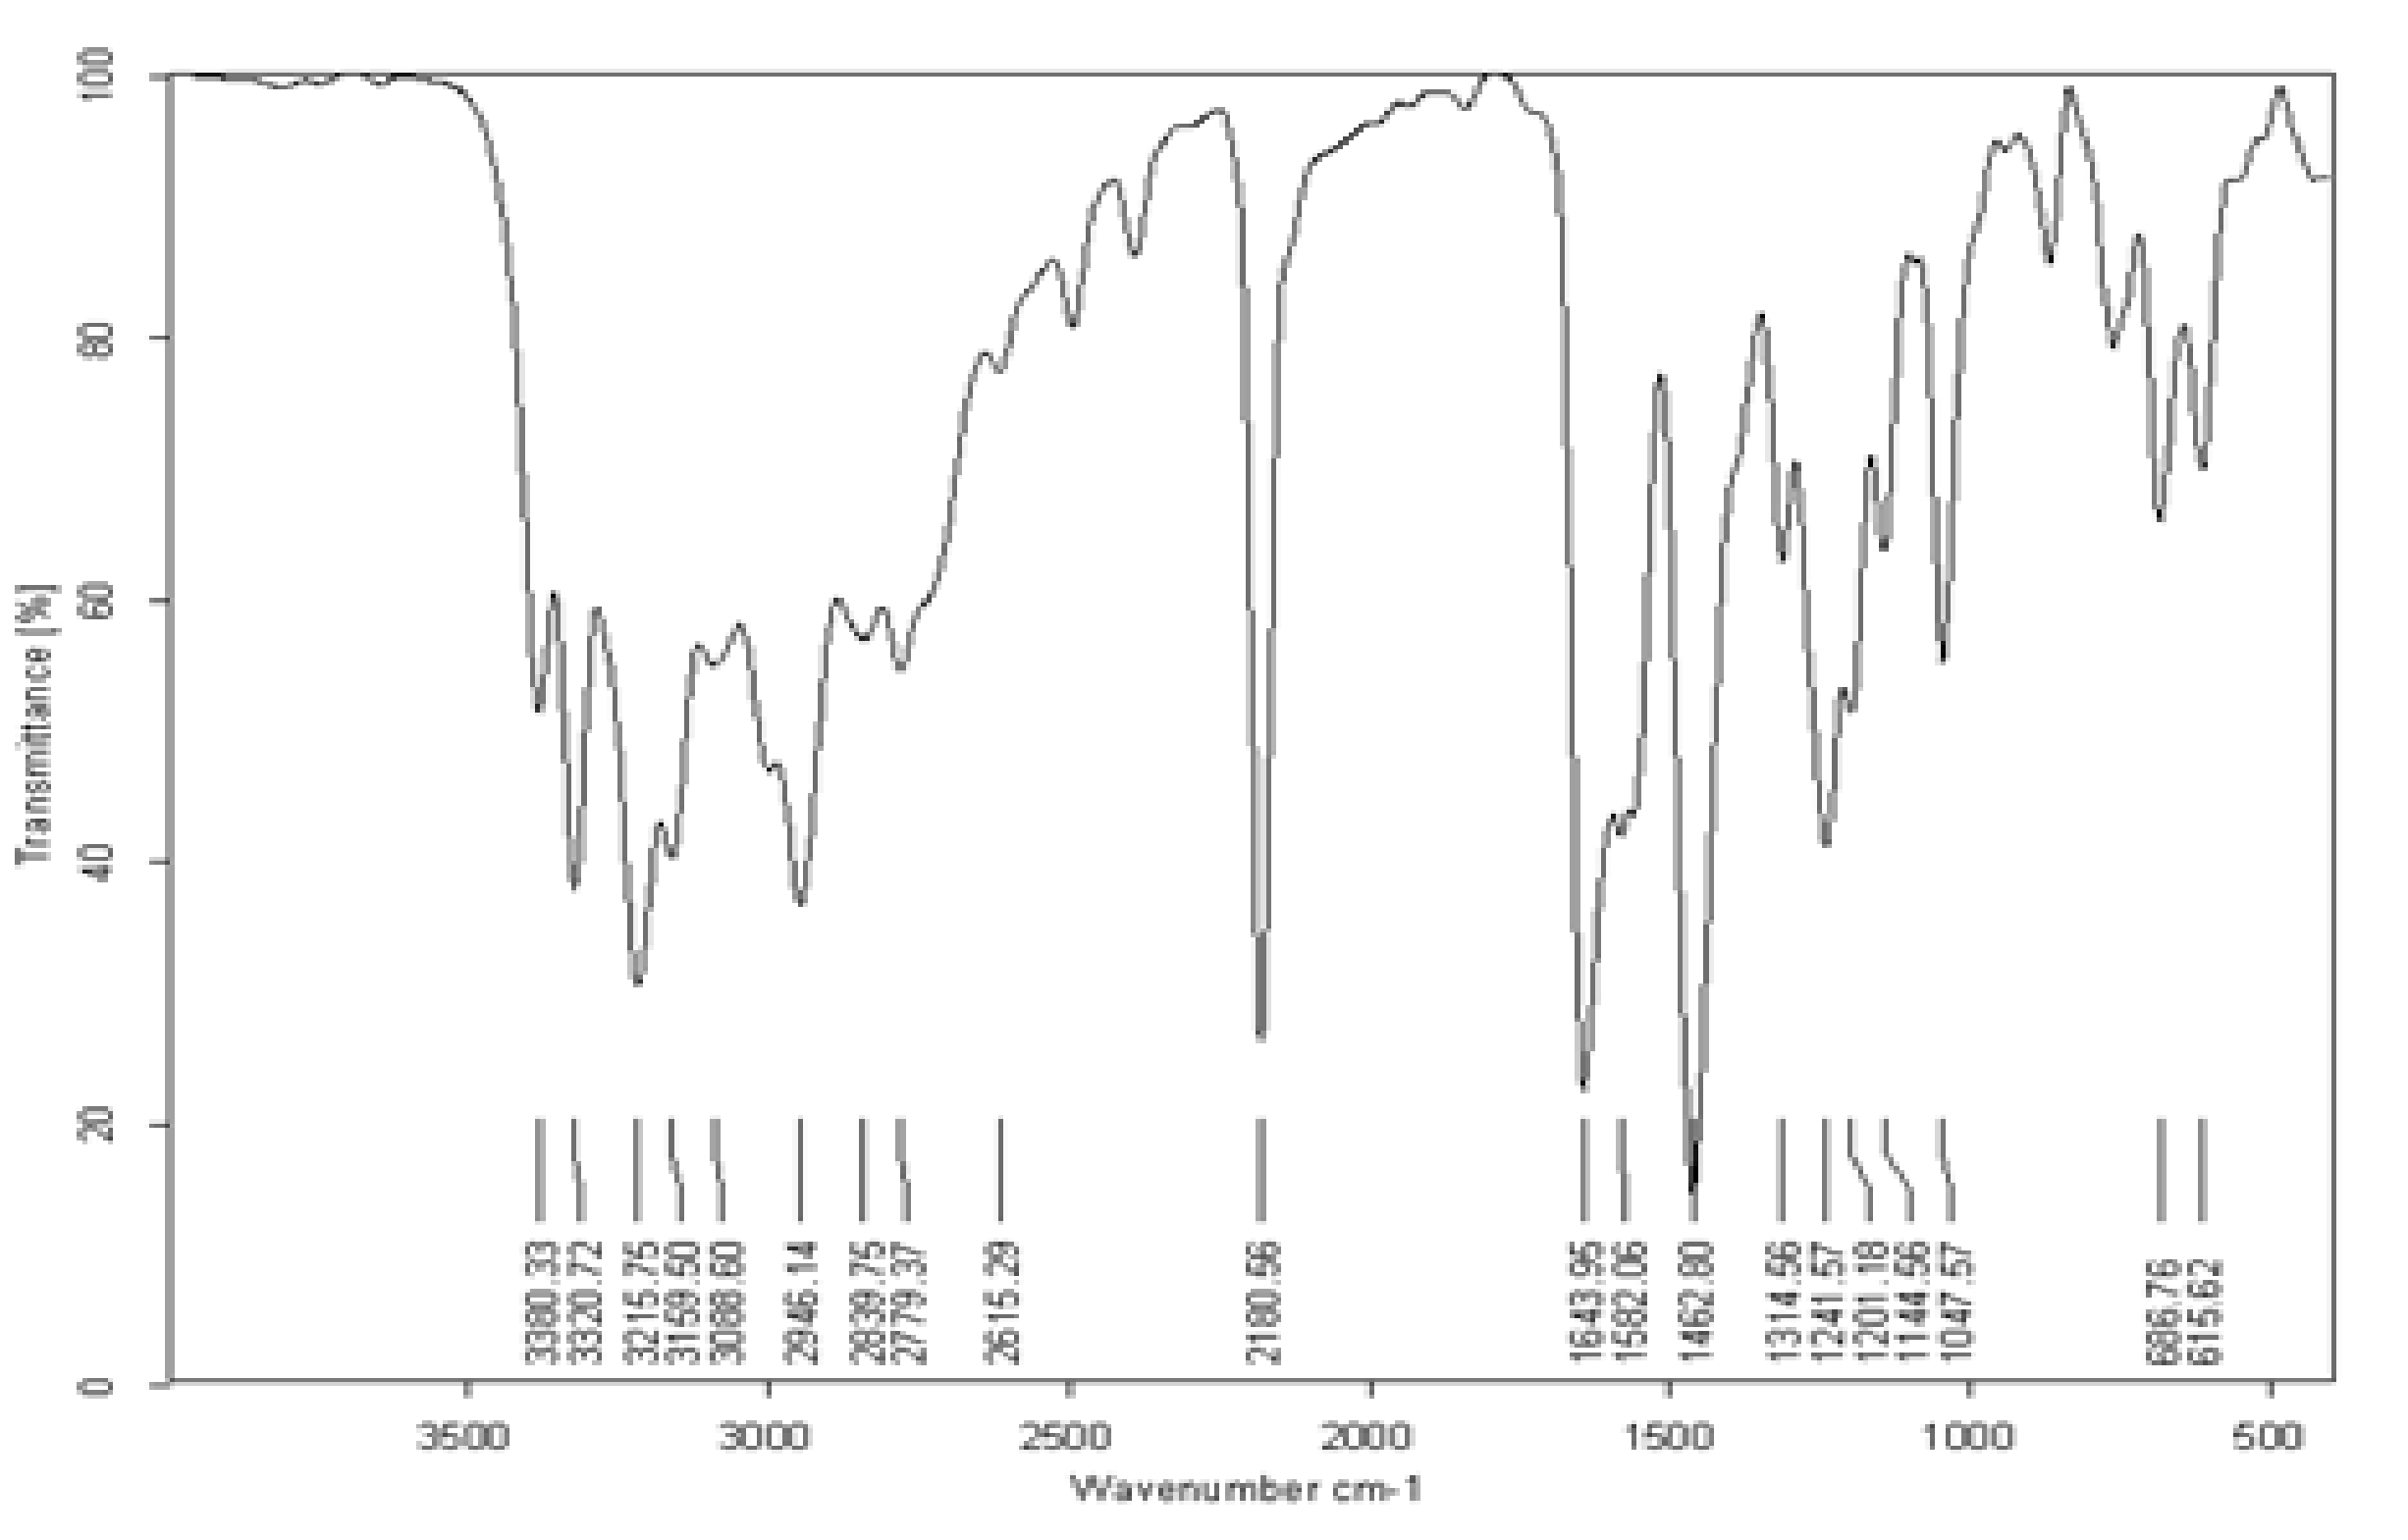


**IR of 4e**


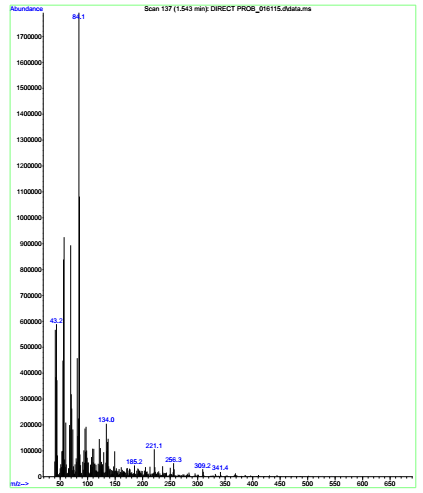


**Mass of 4e**


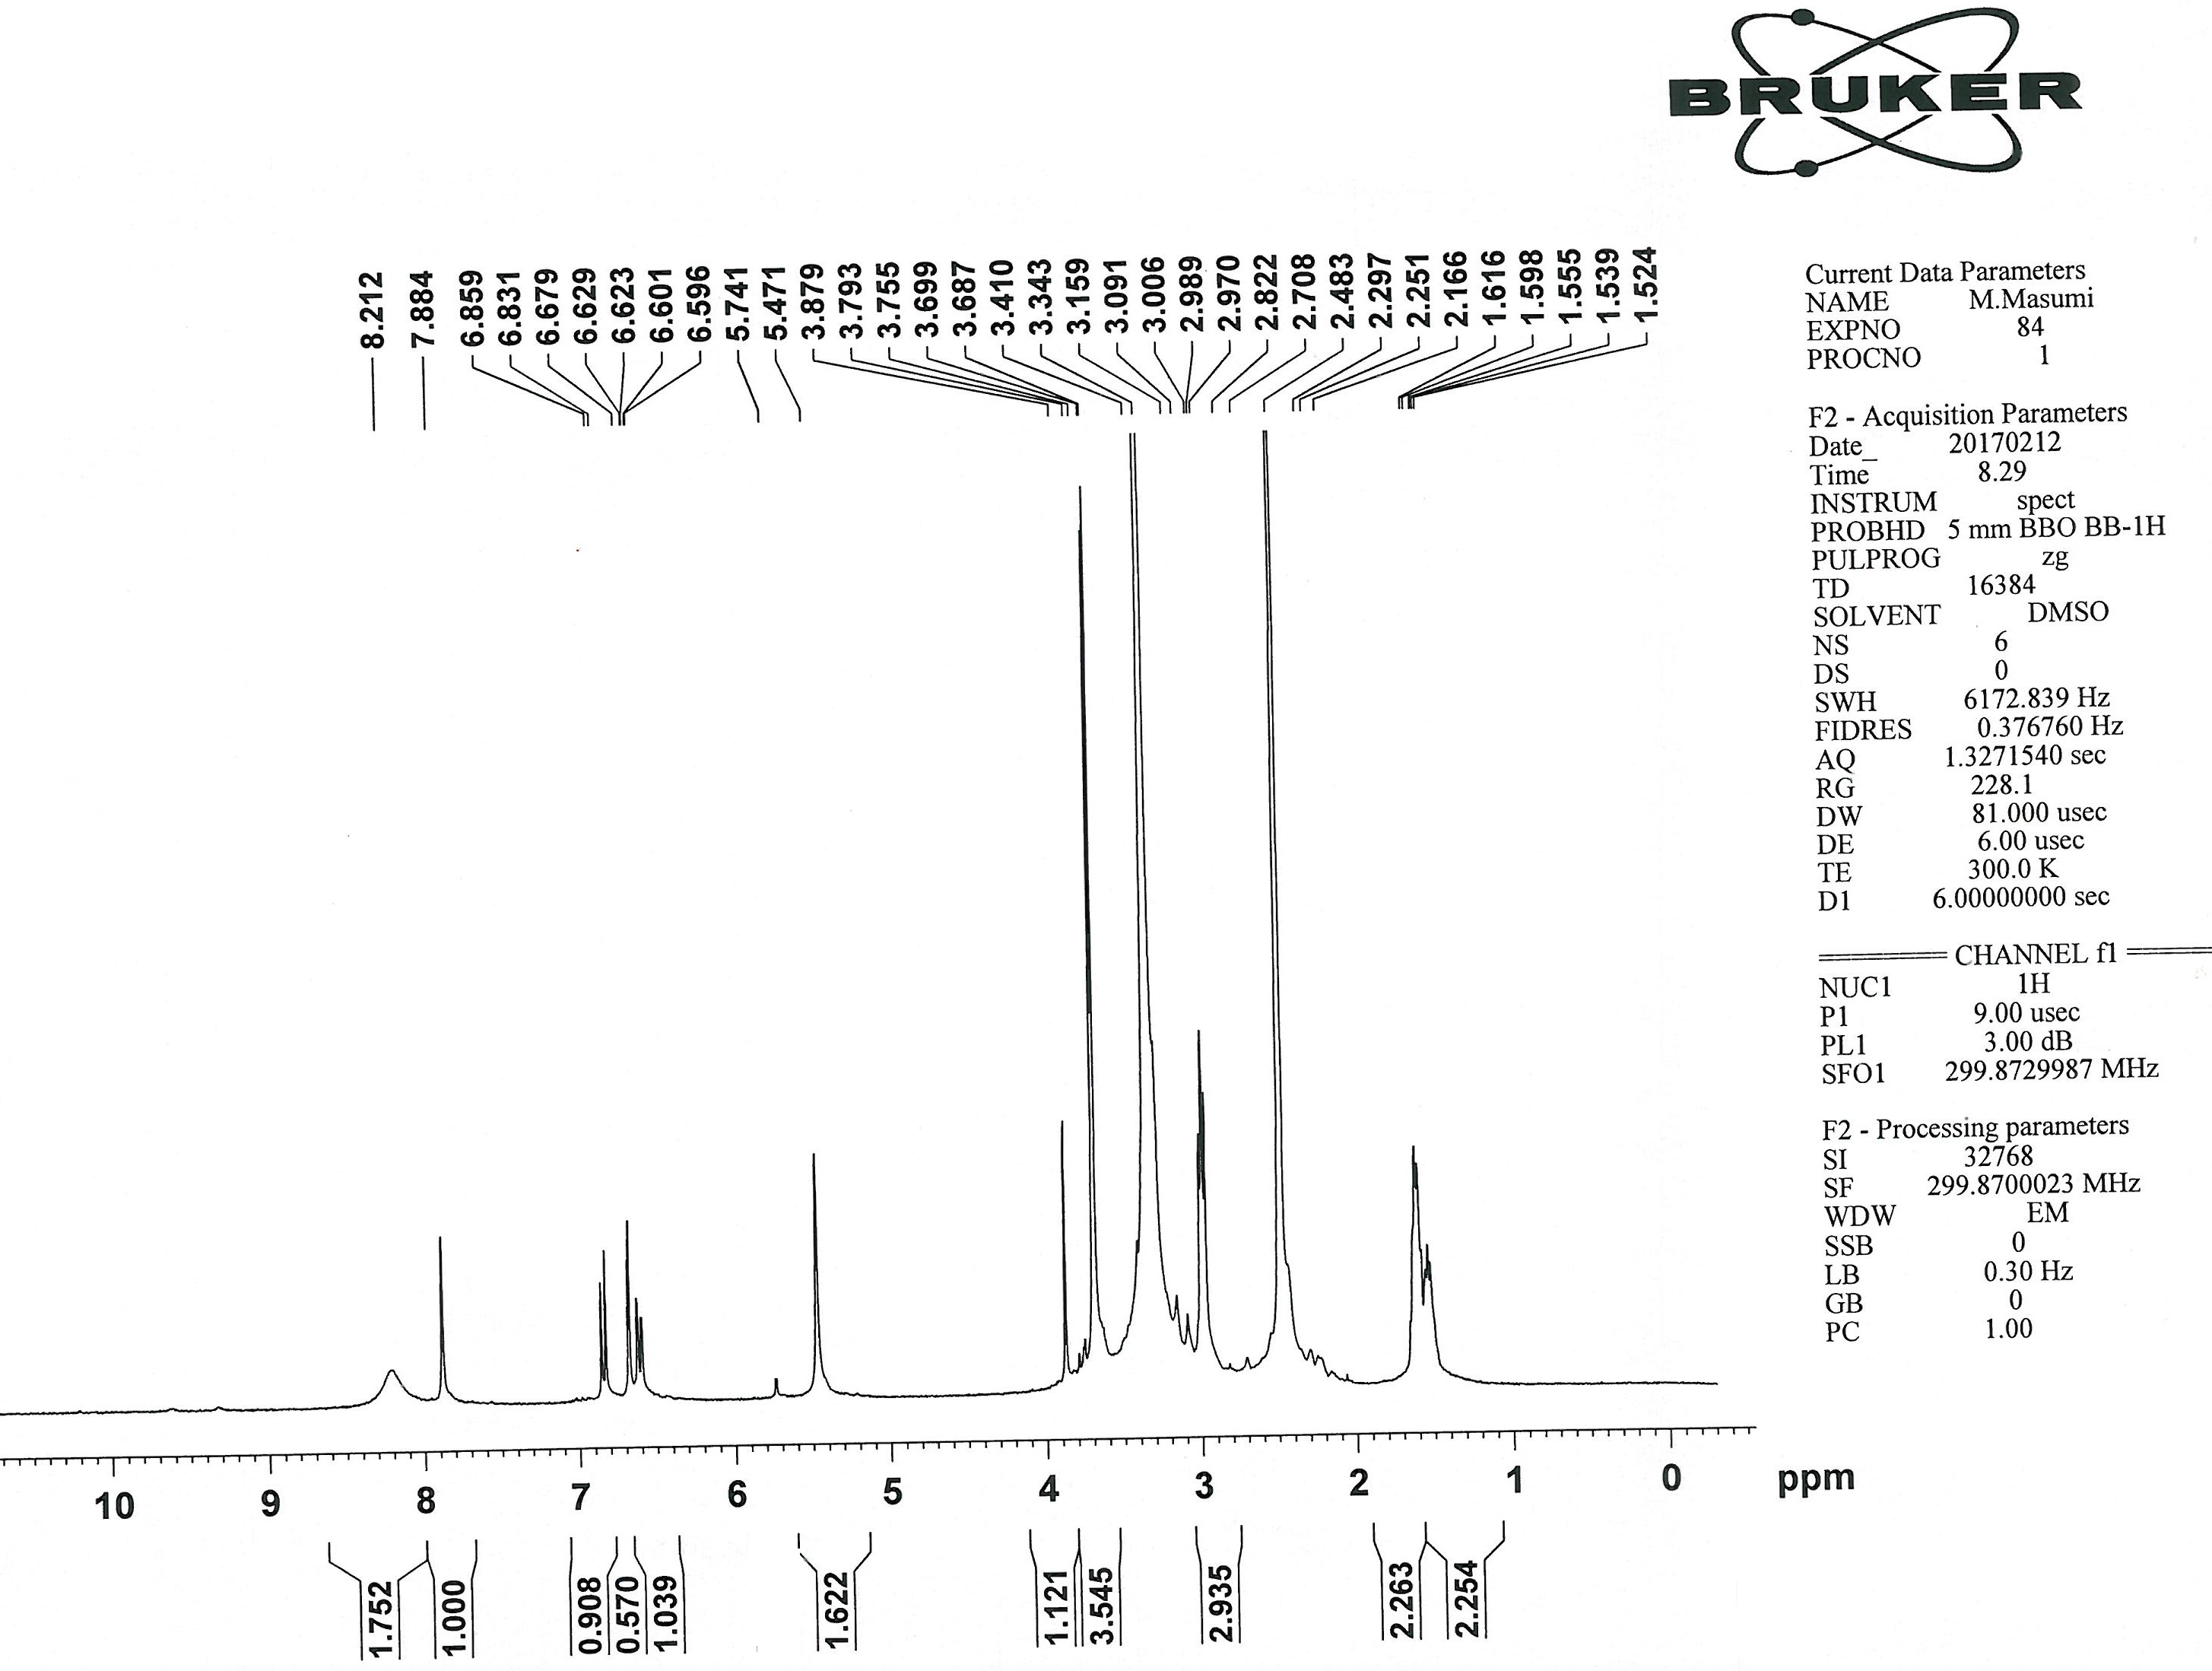


**1H NMR of 4f**


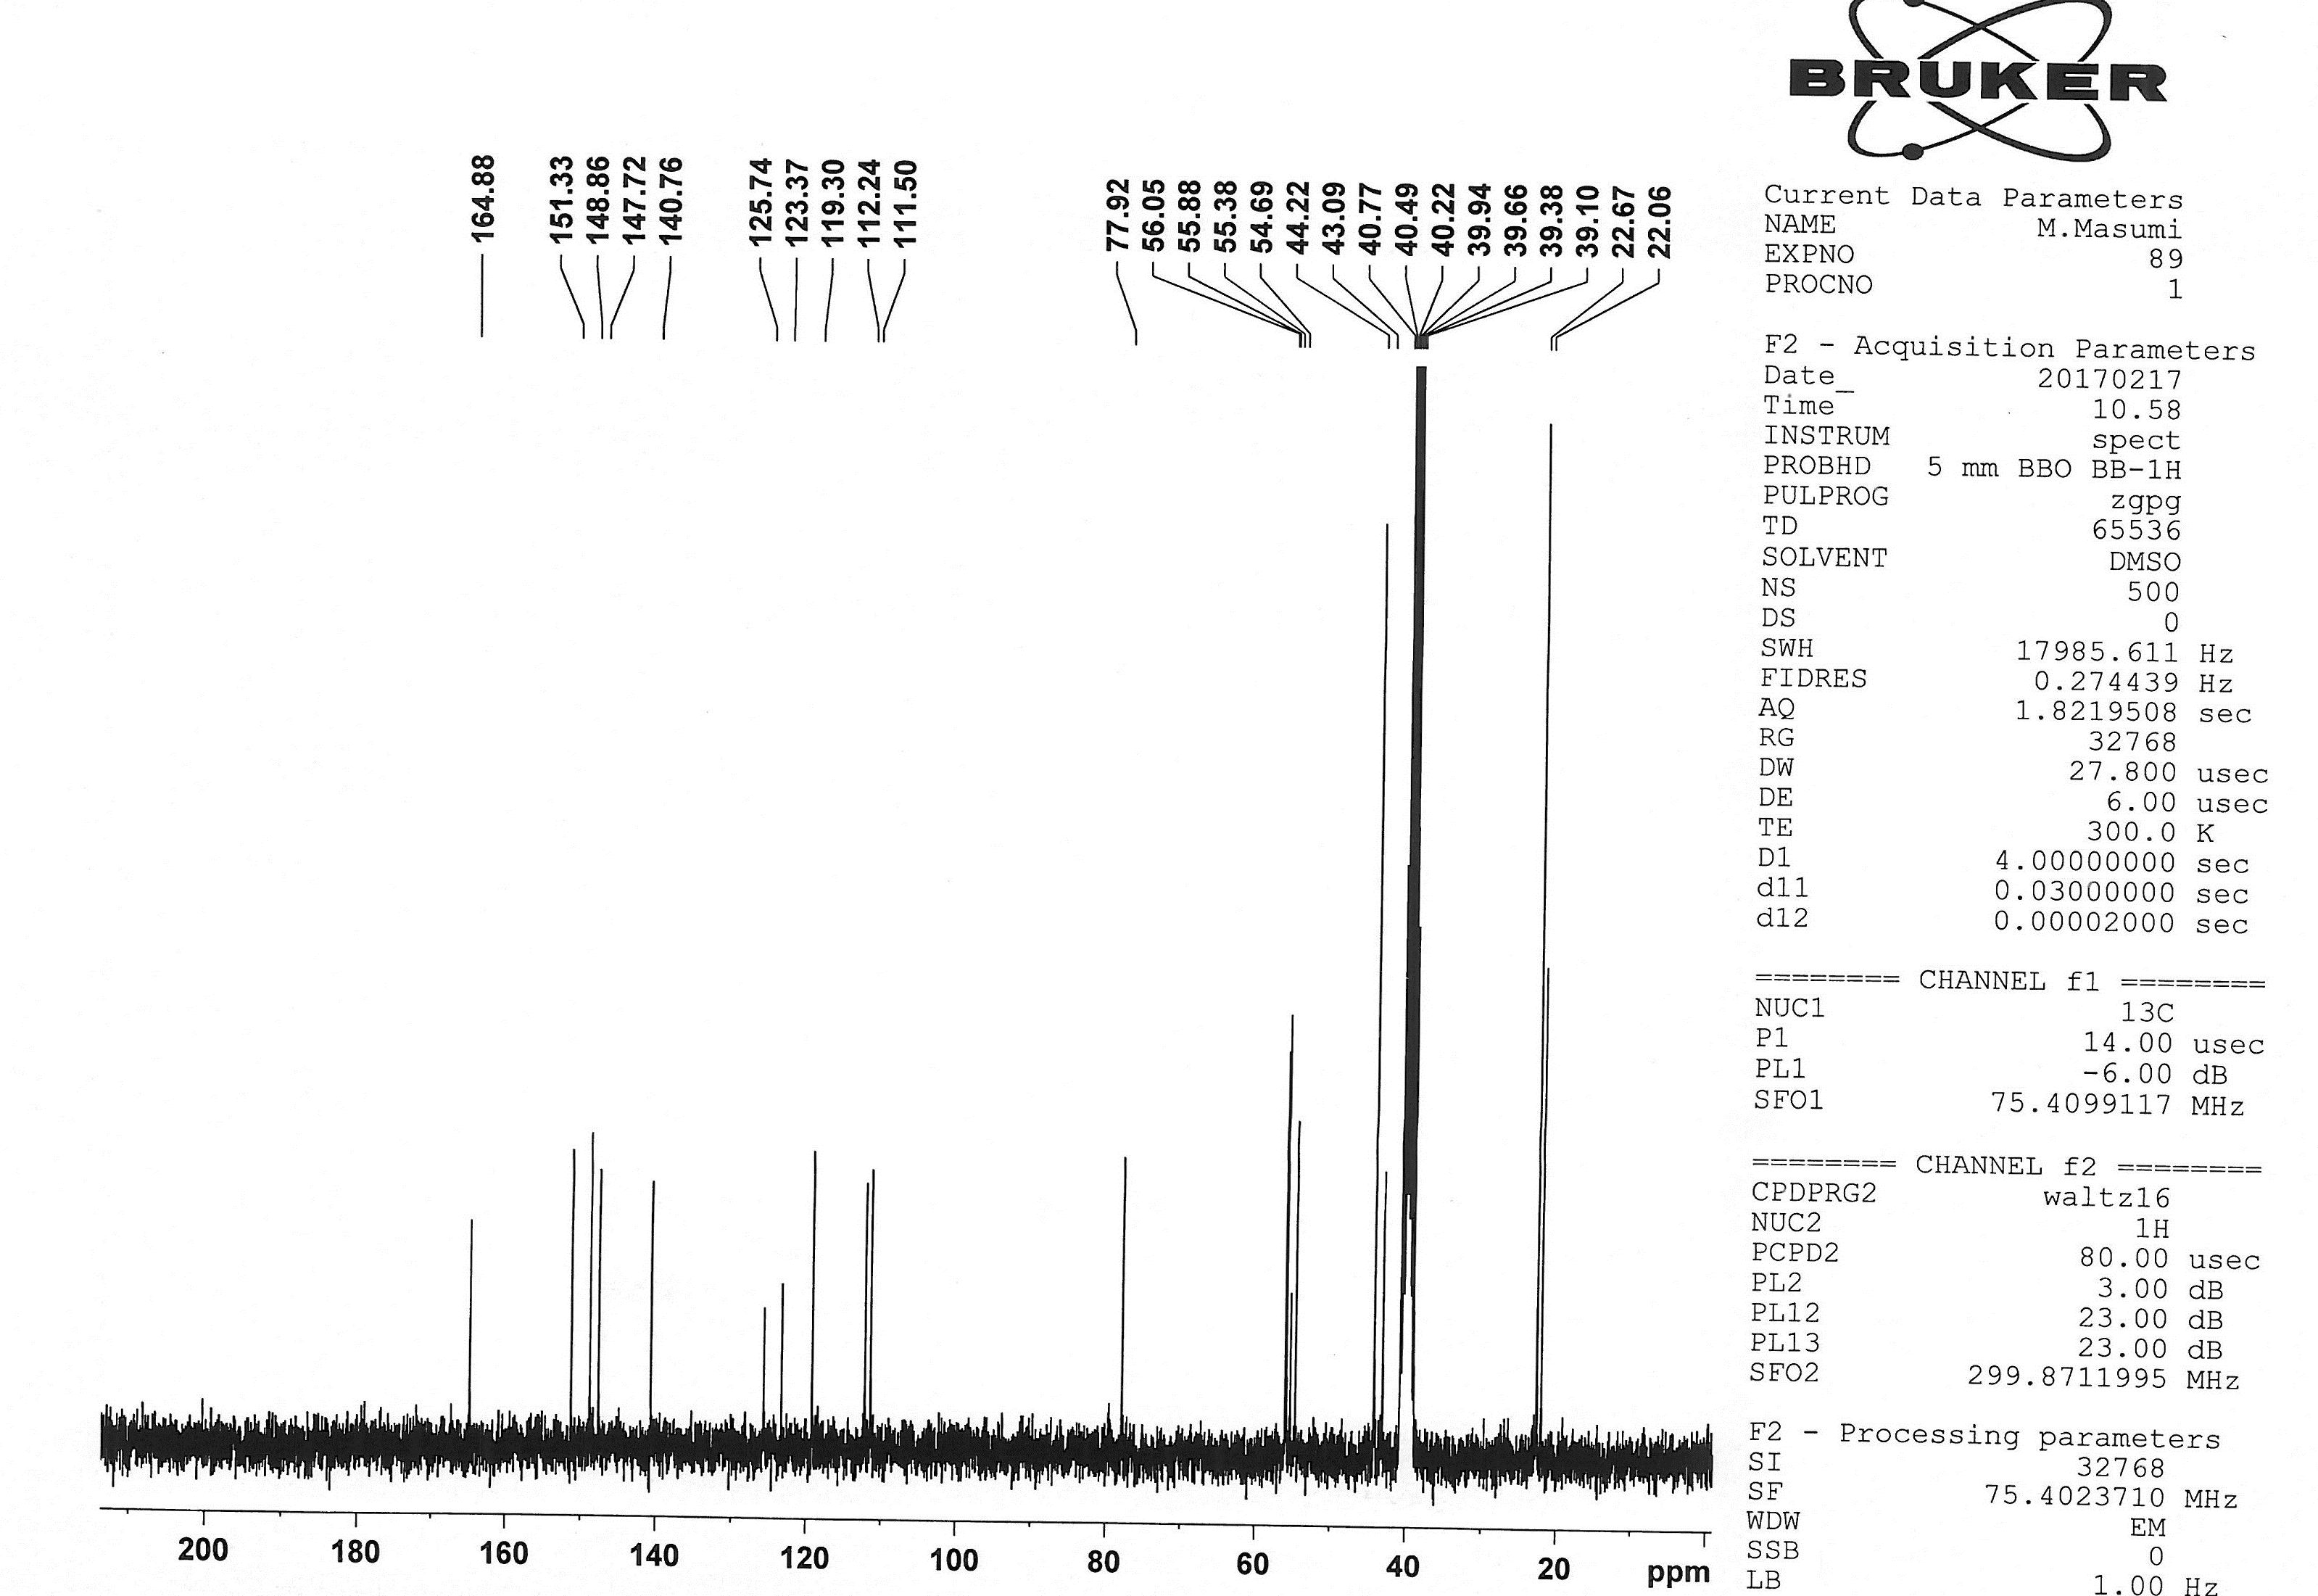


**13C NMR of 4f**


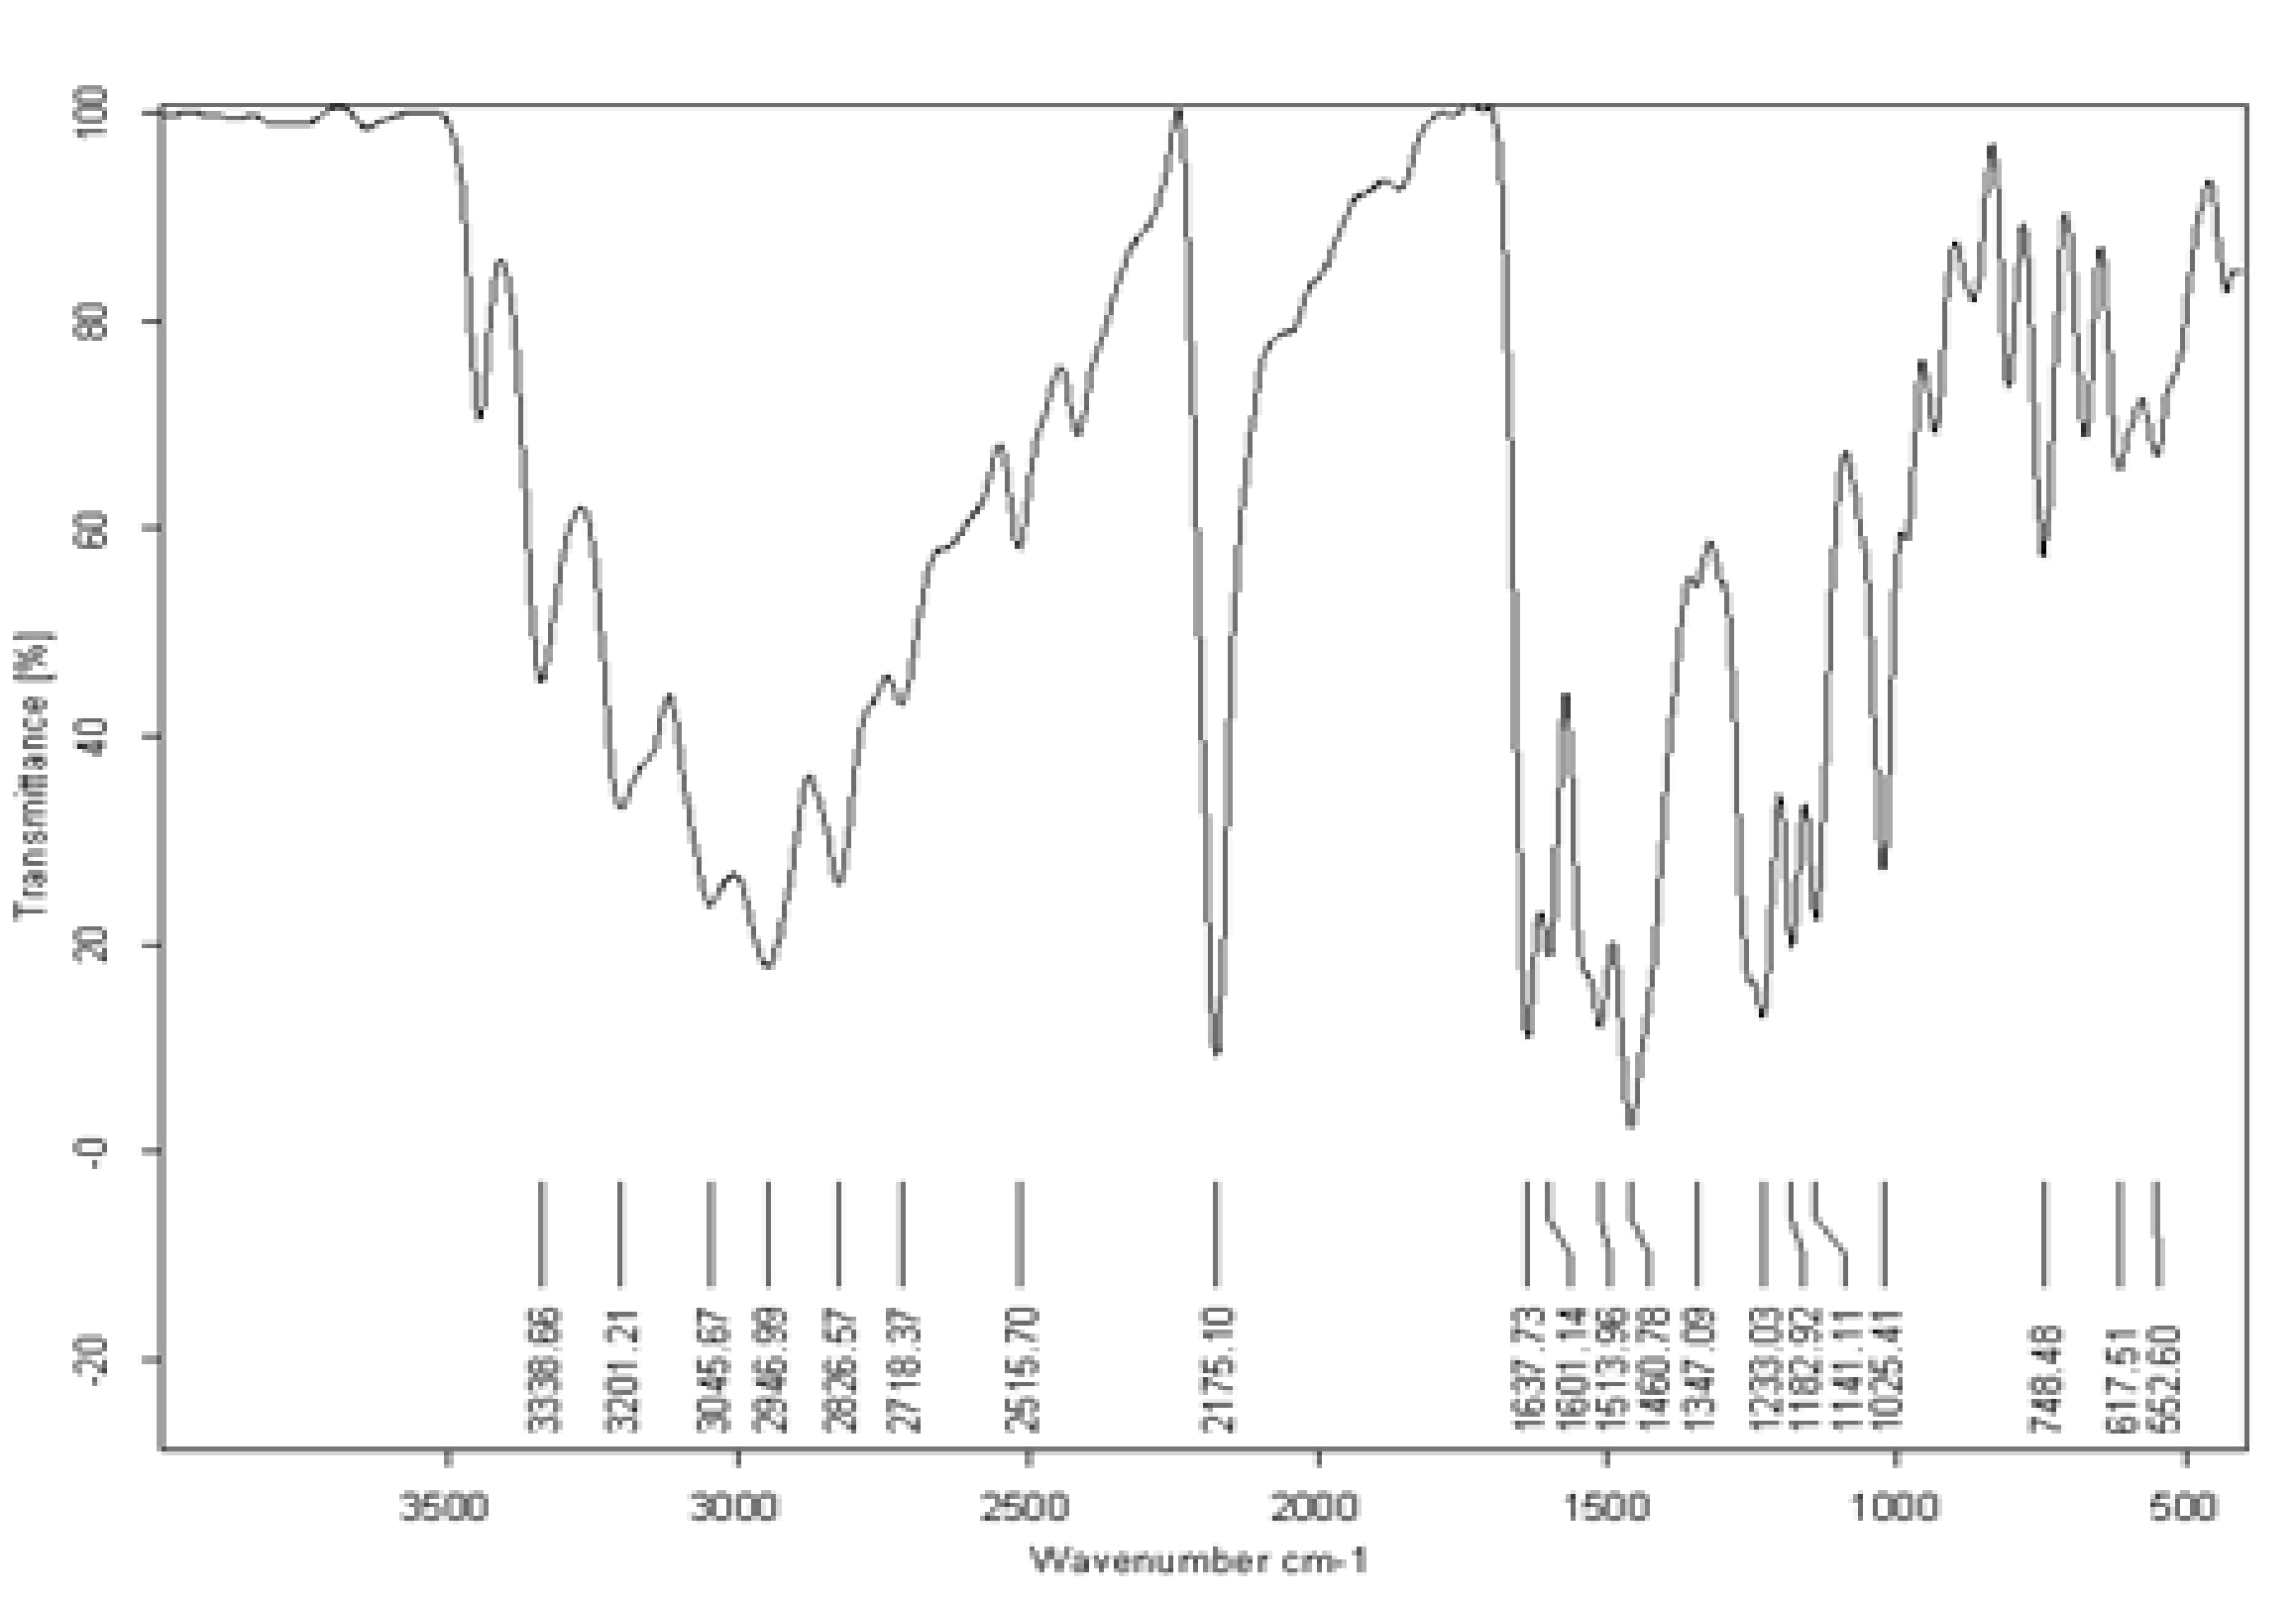


**IR of 4f**


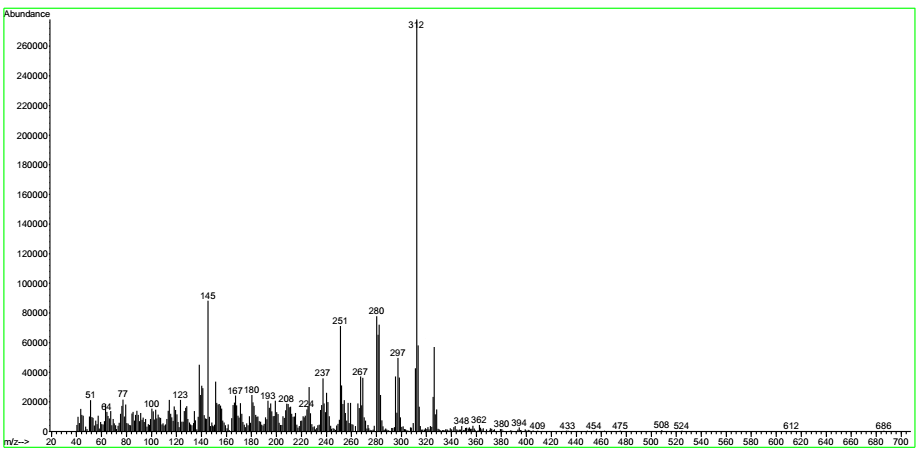


**Mass of 4f**


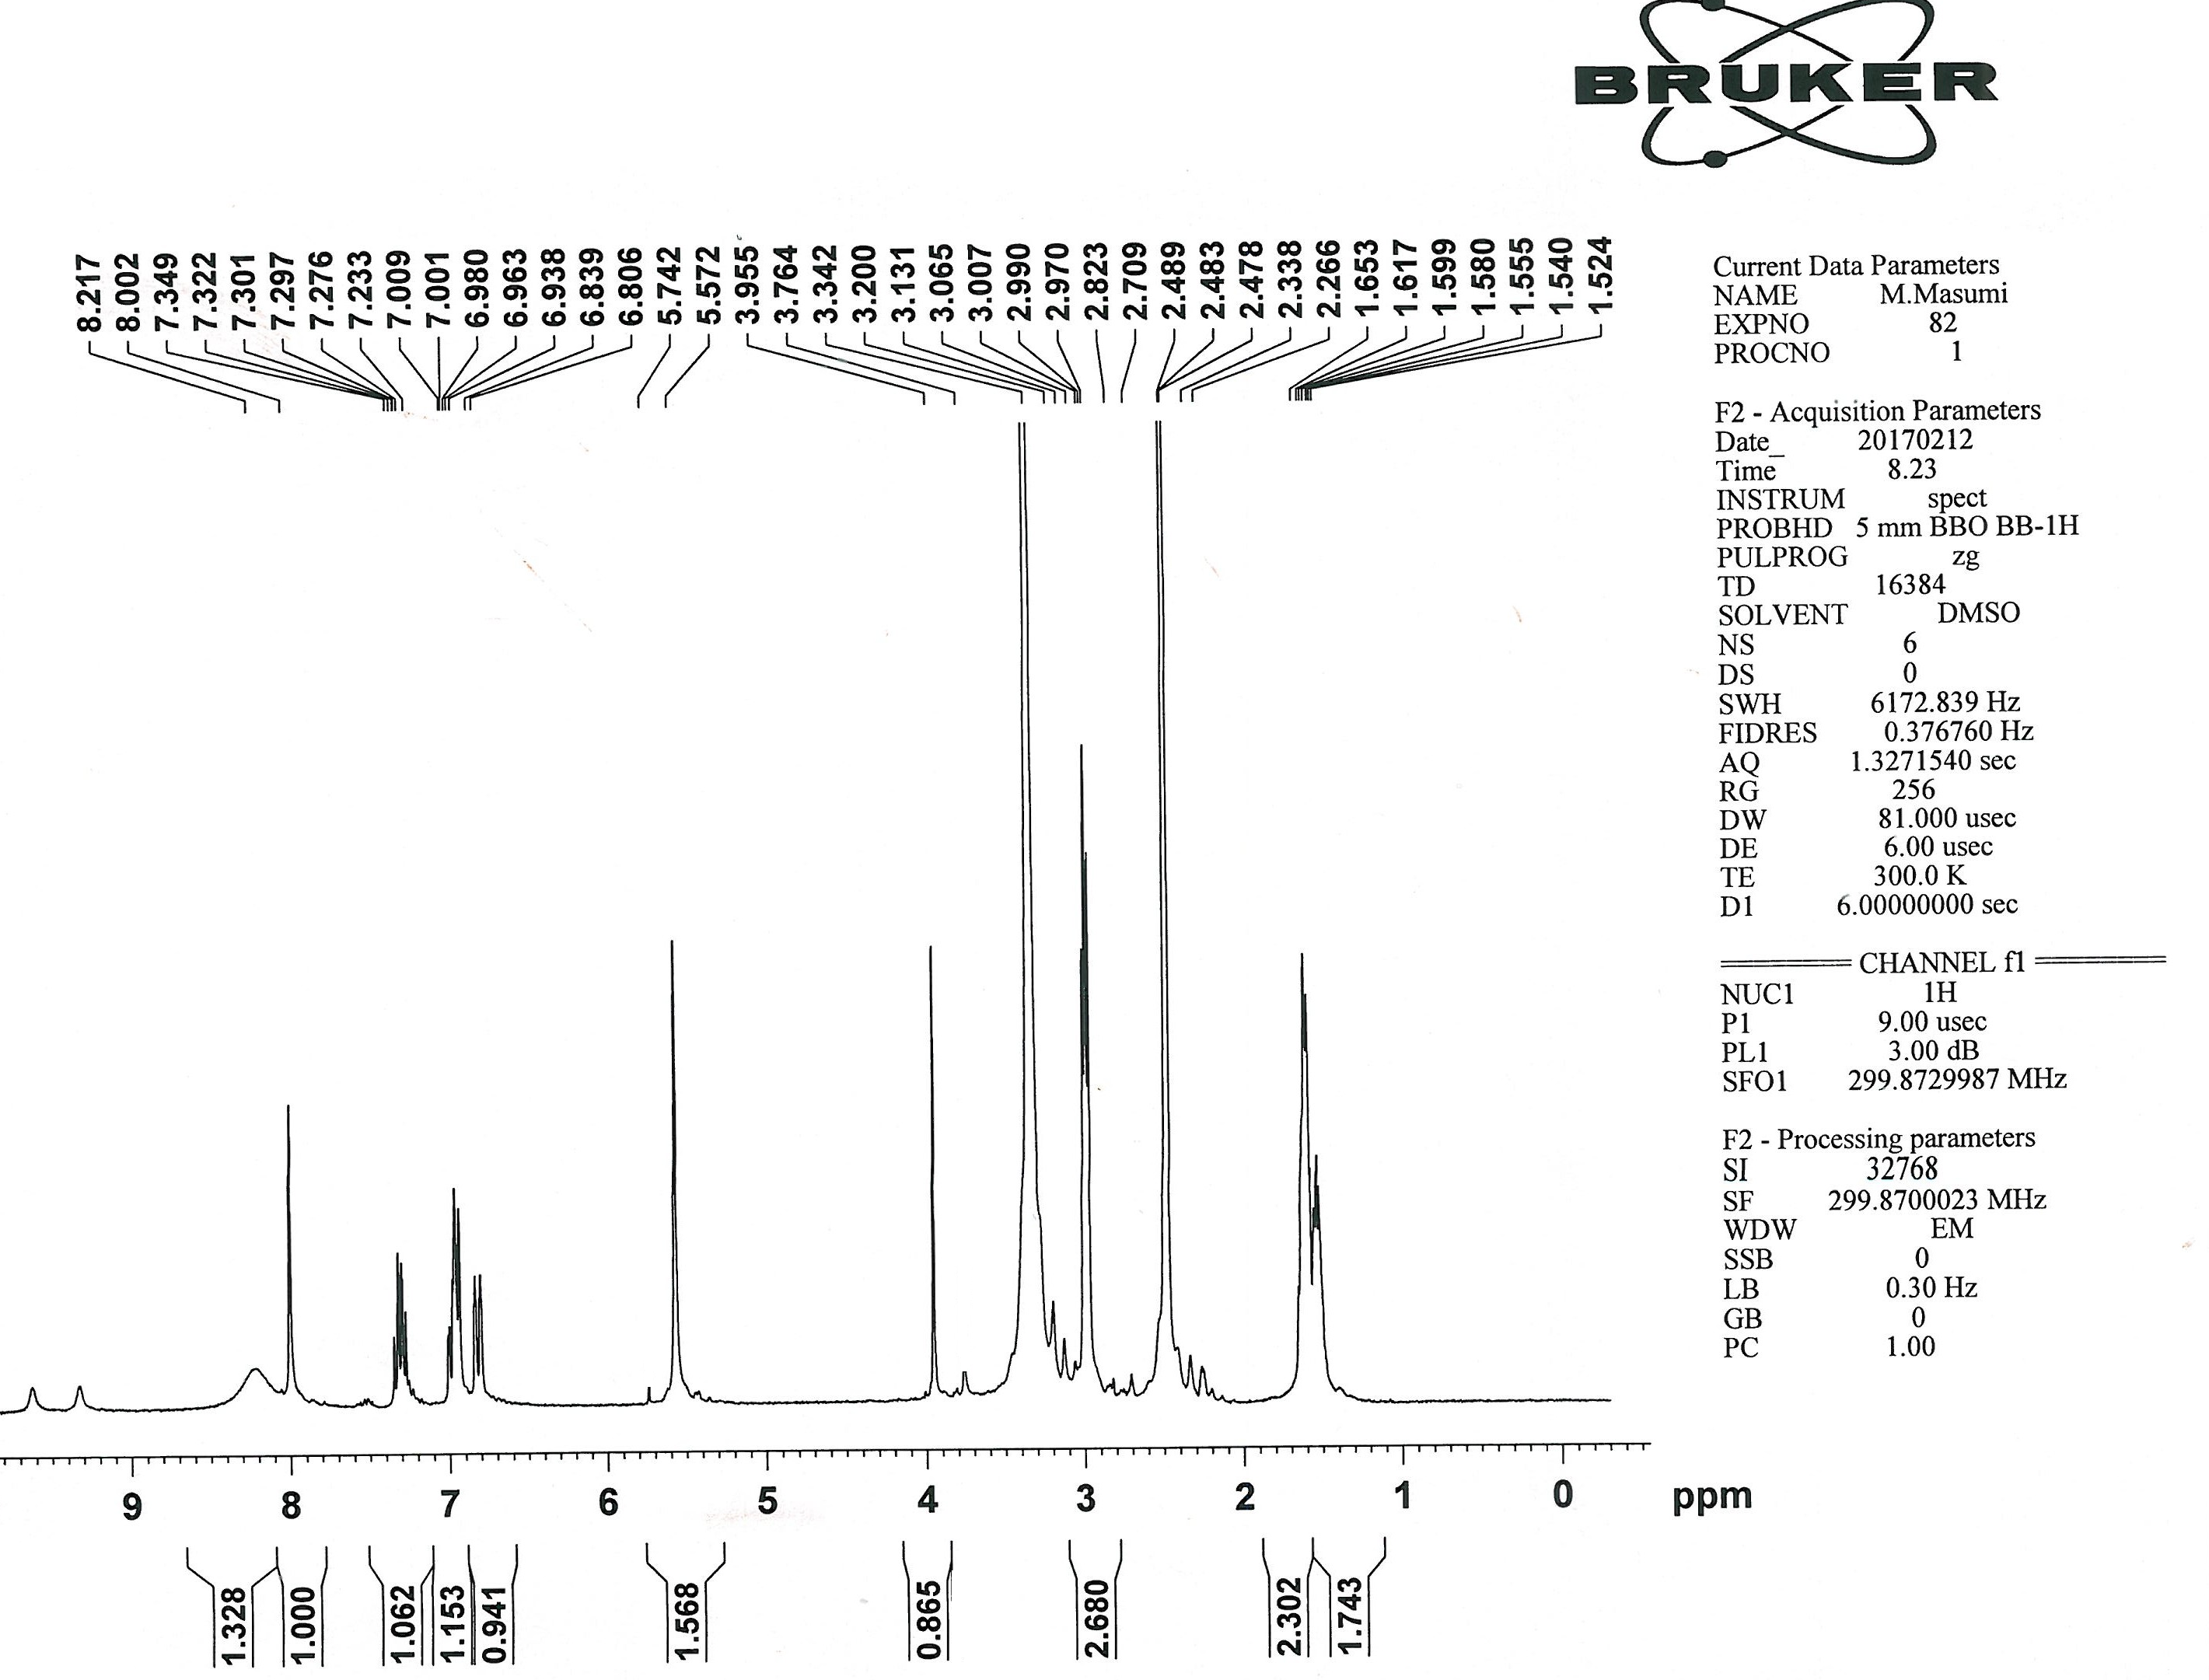


**1H NMR of 4g**


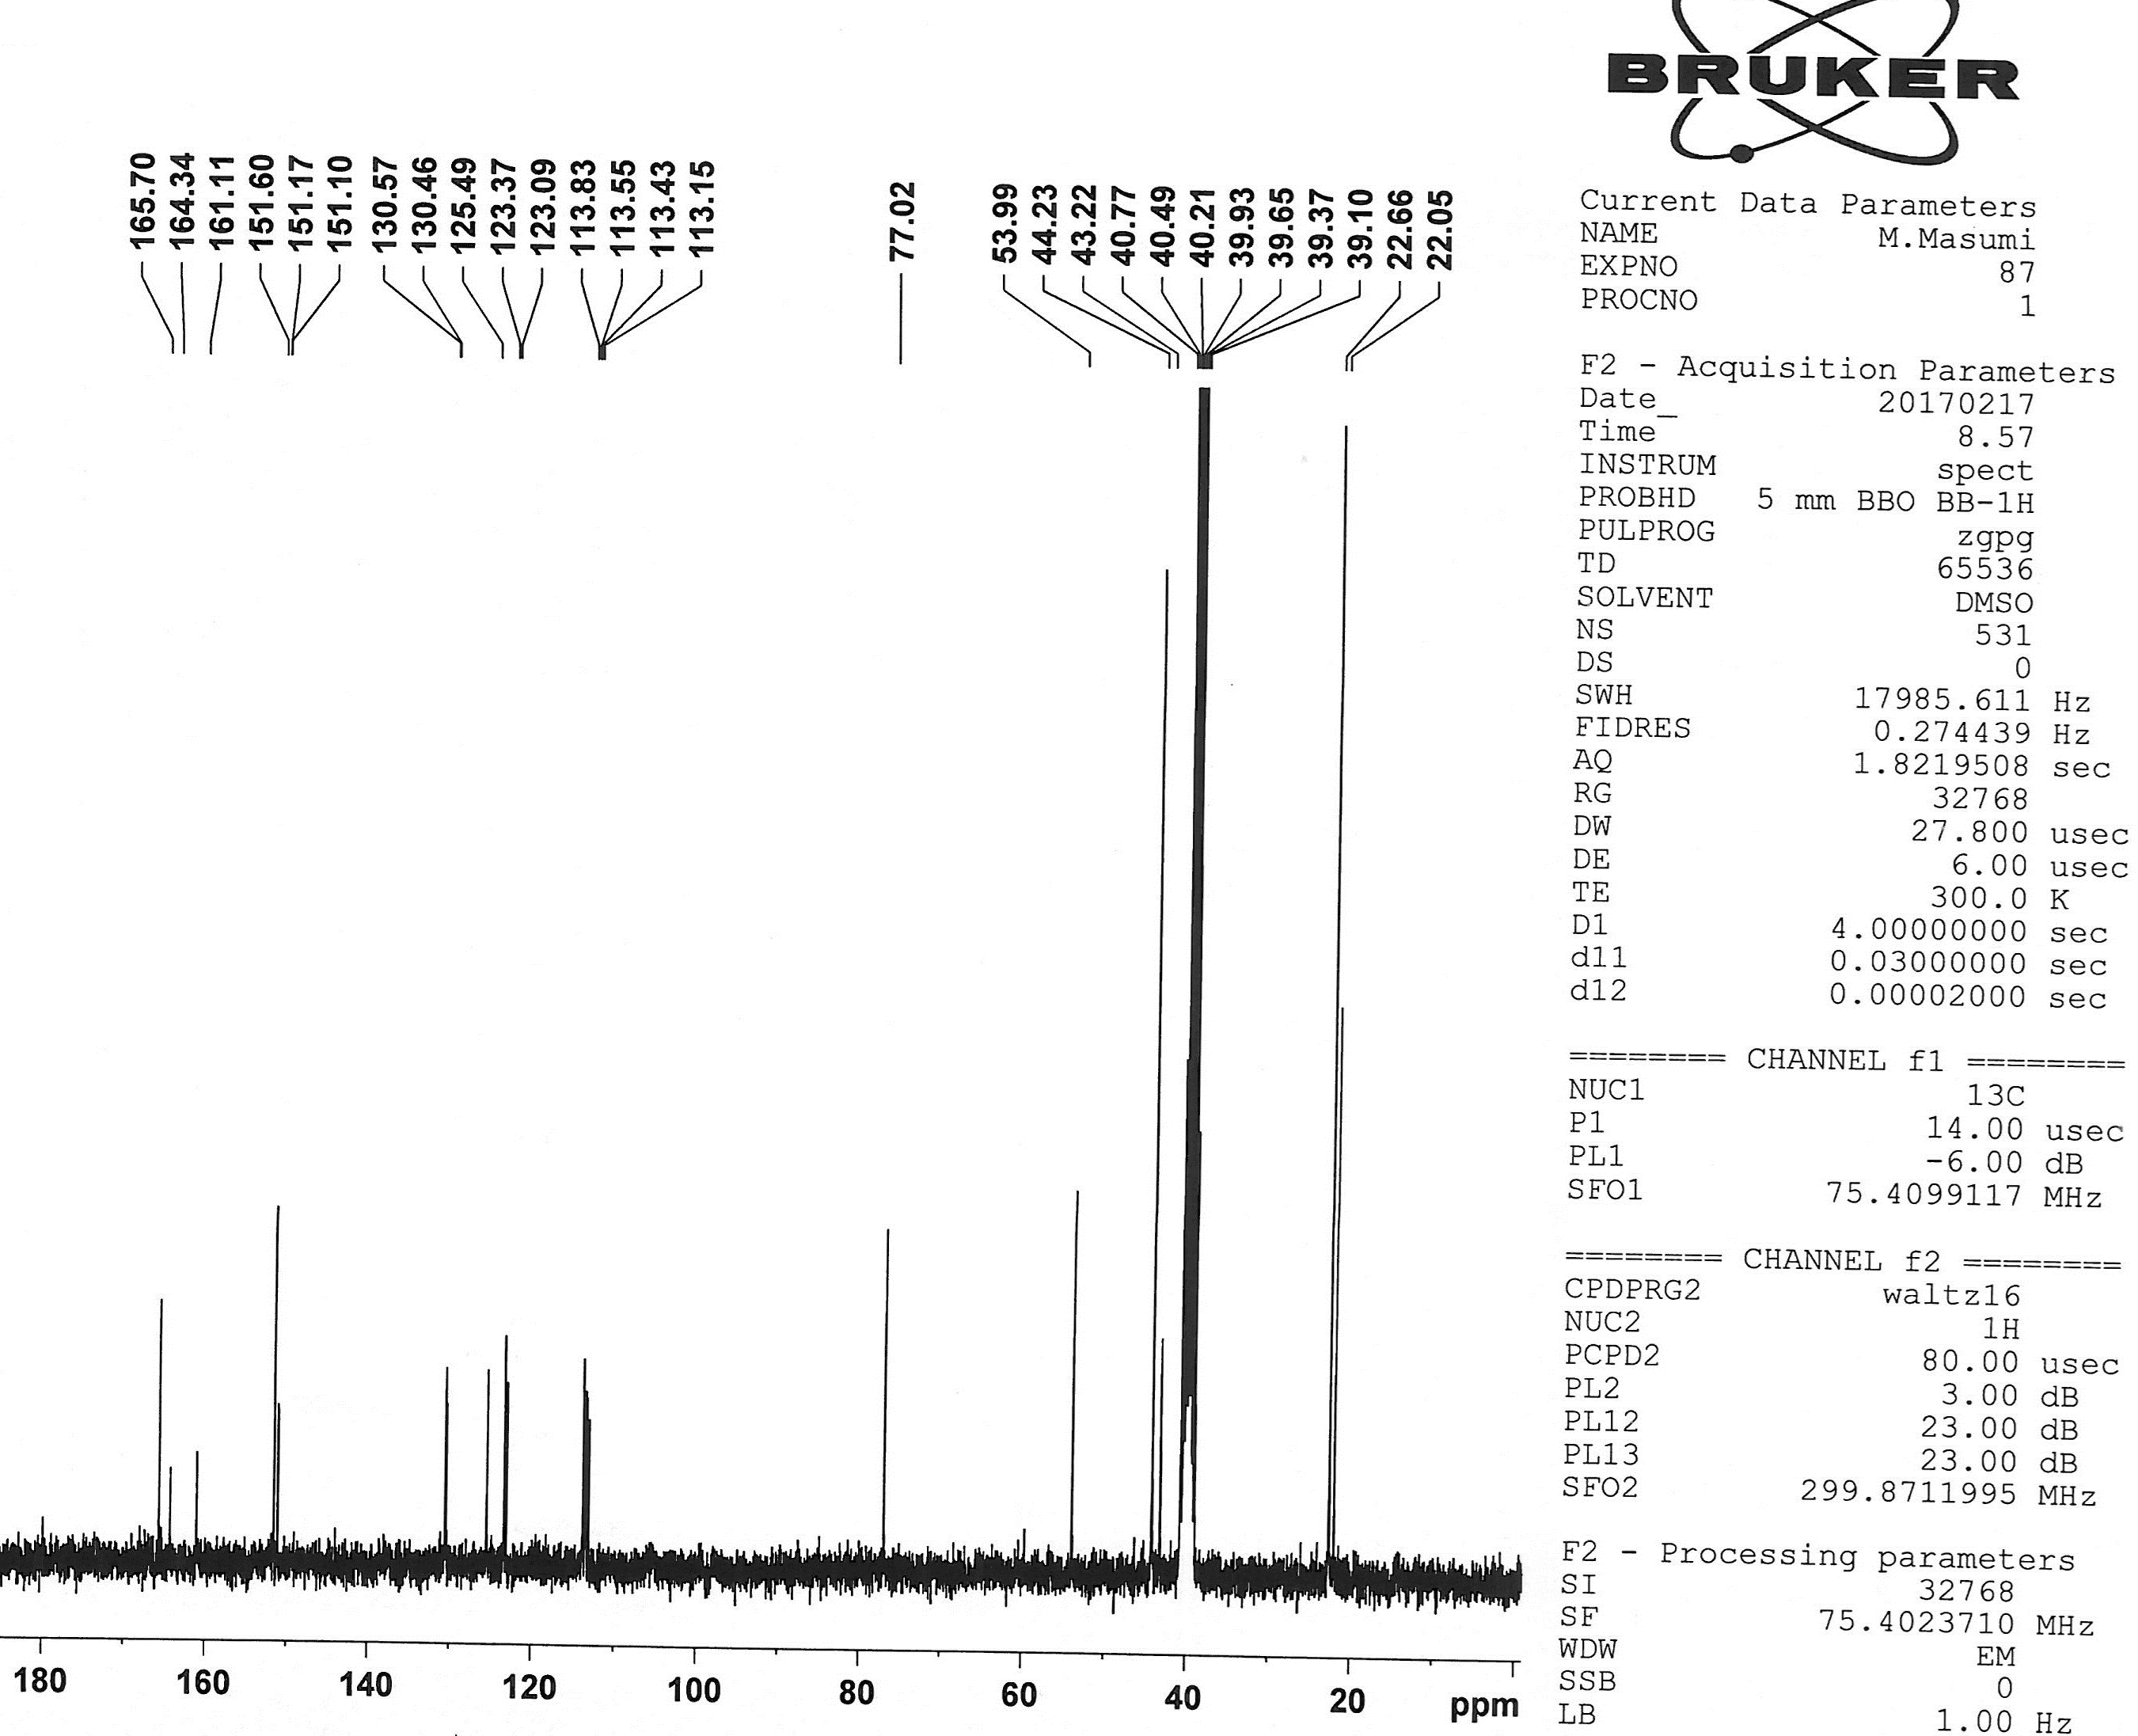


**13C NMR of 4g**


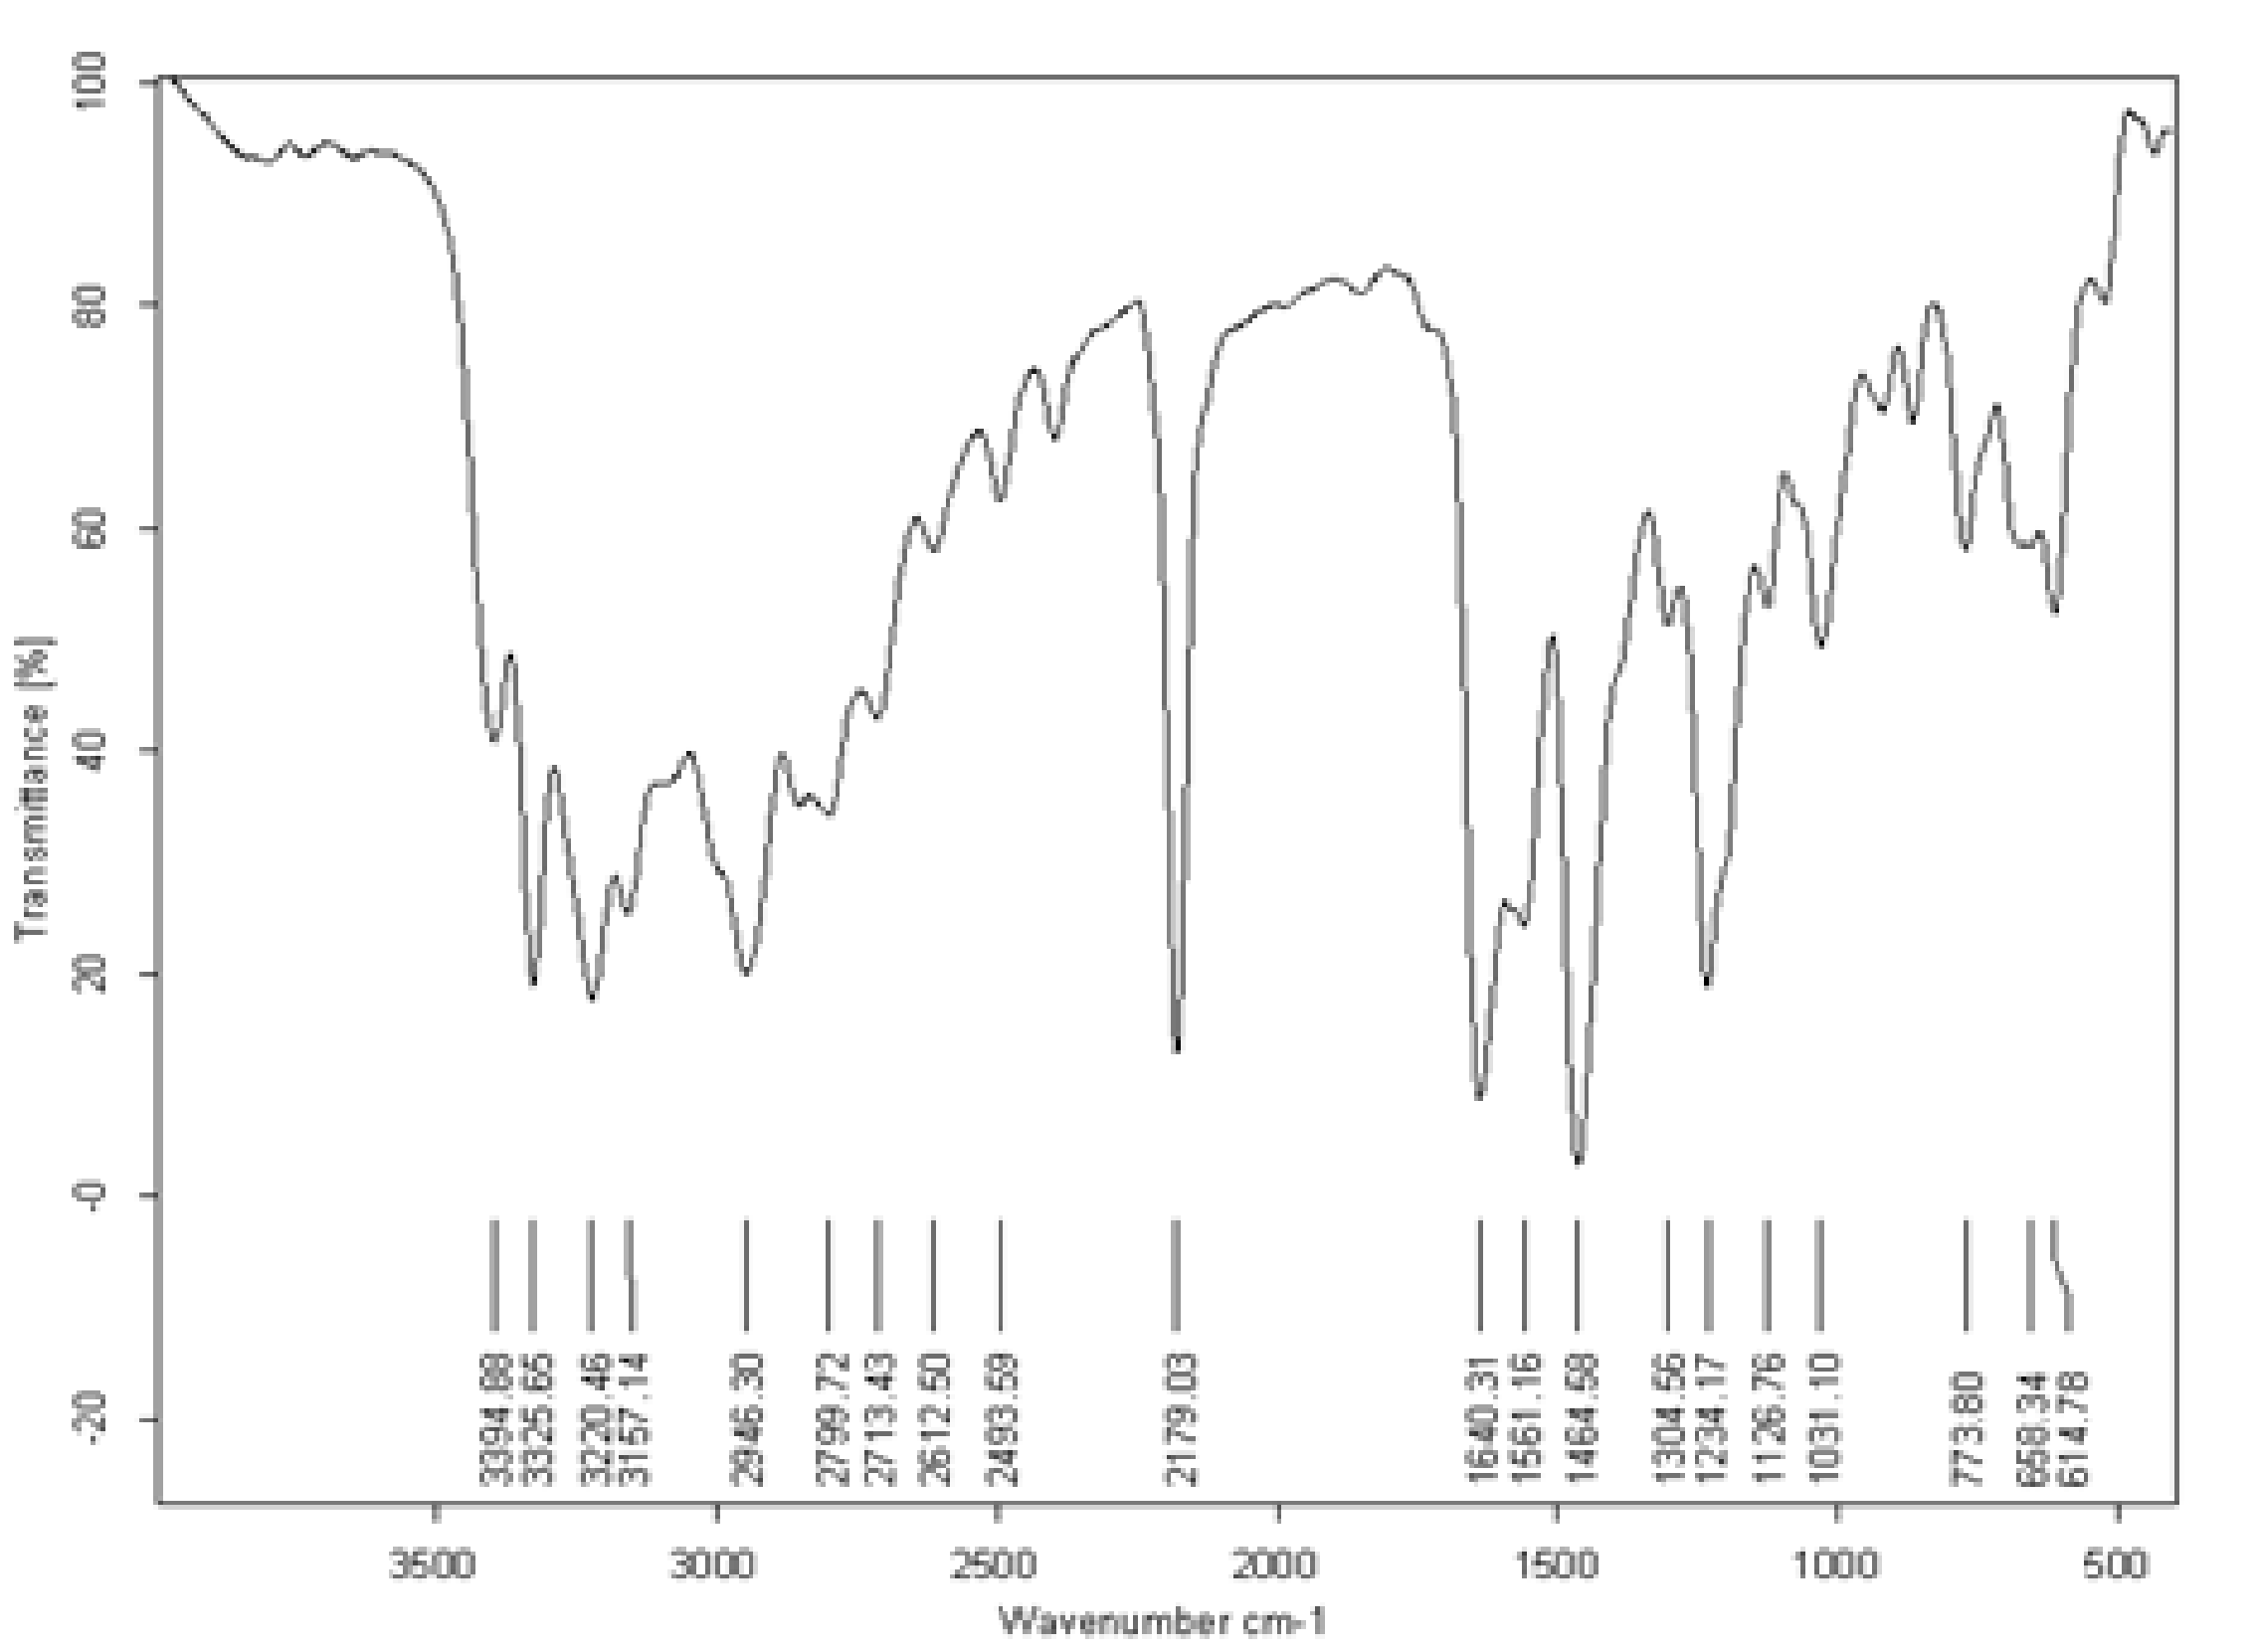


**IR of 4g**


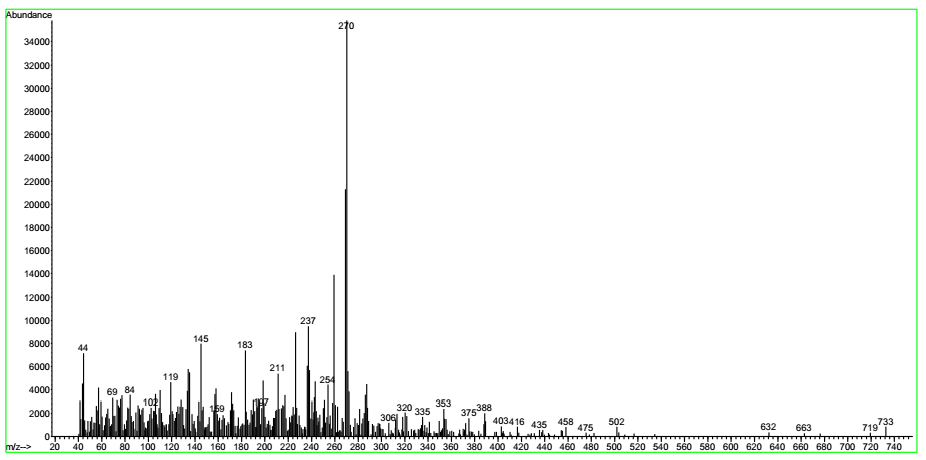


**Mass of 4g**


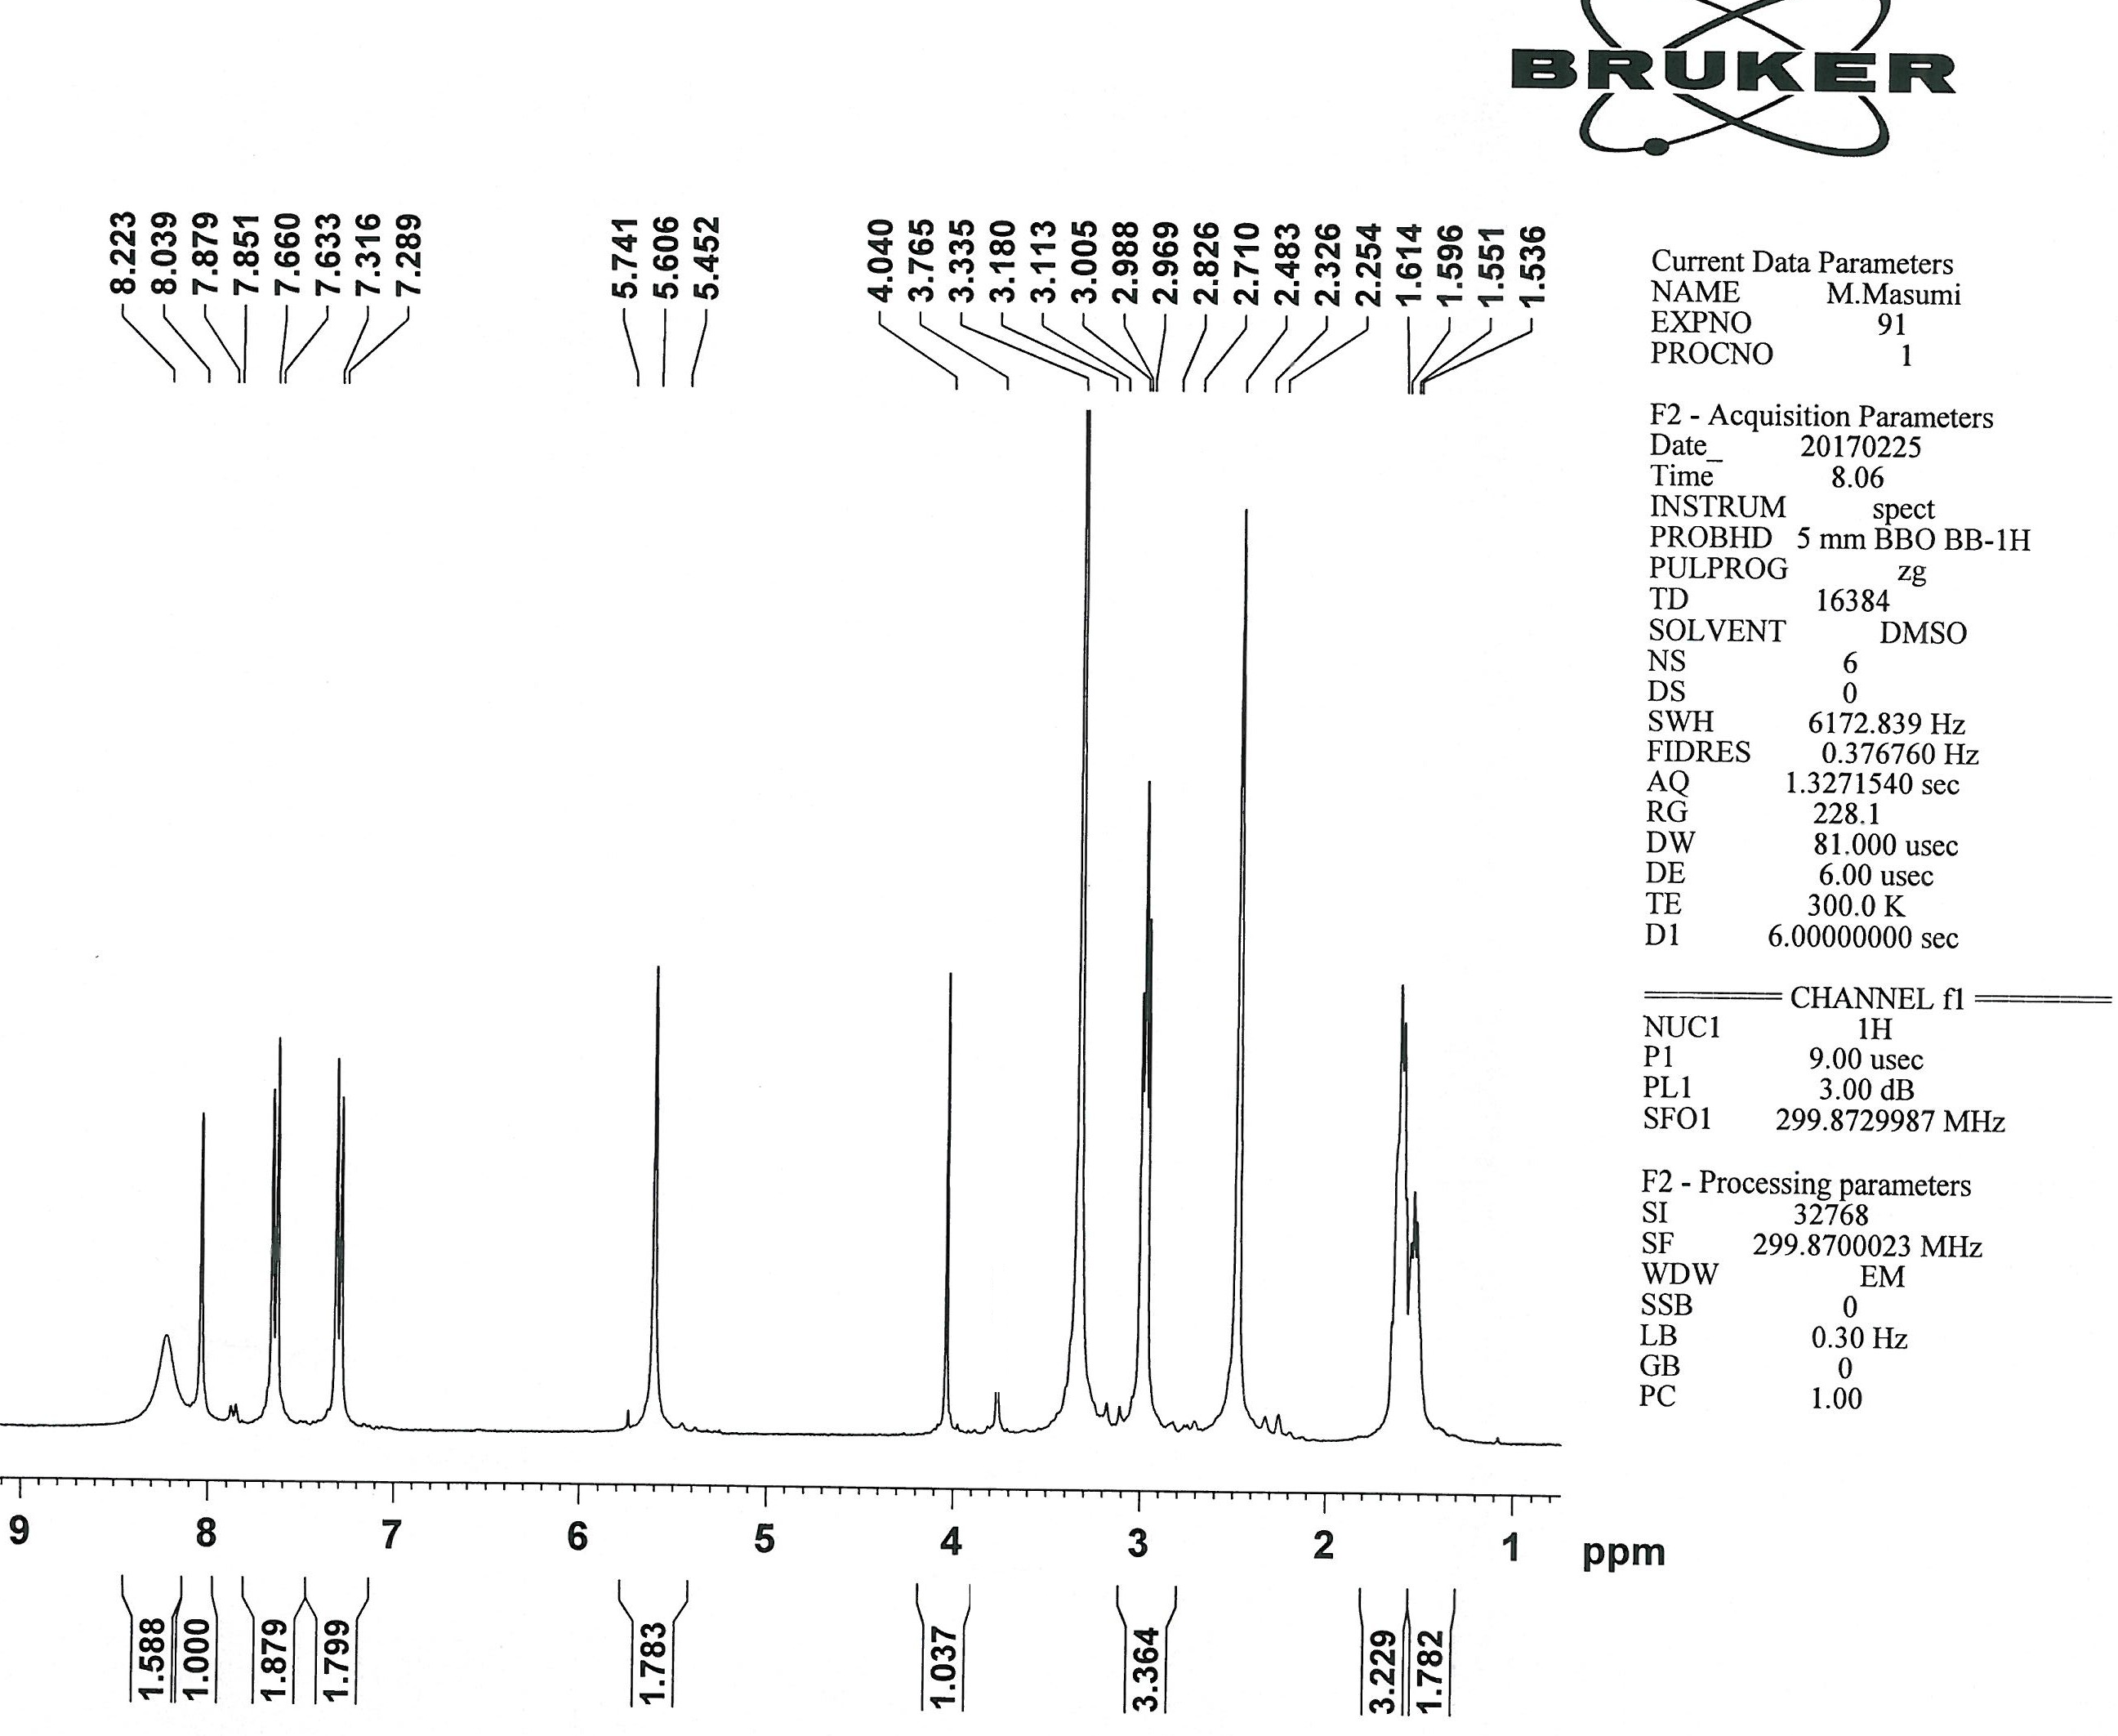


**1H NMR of 4h**


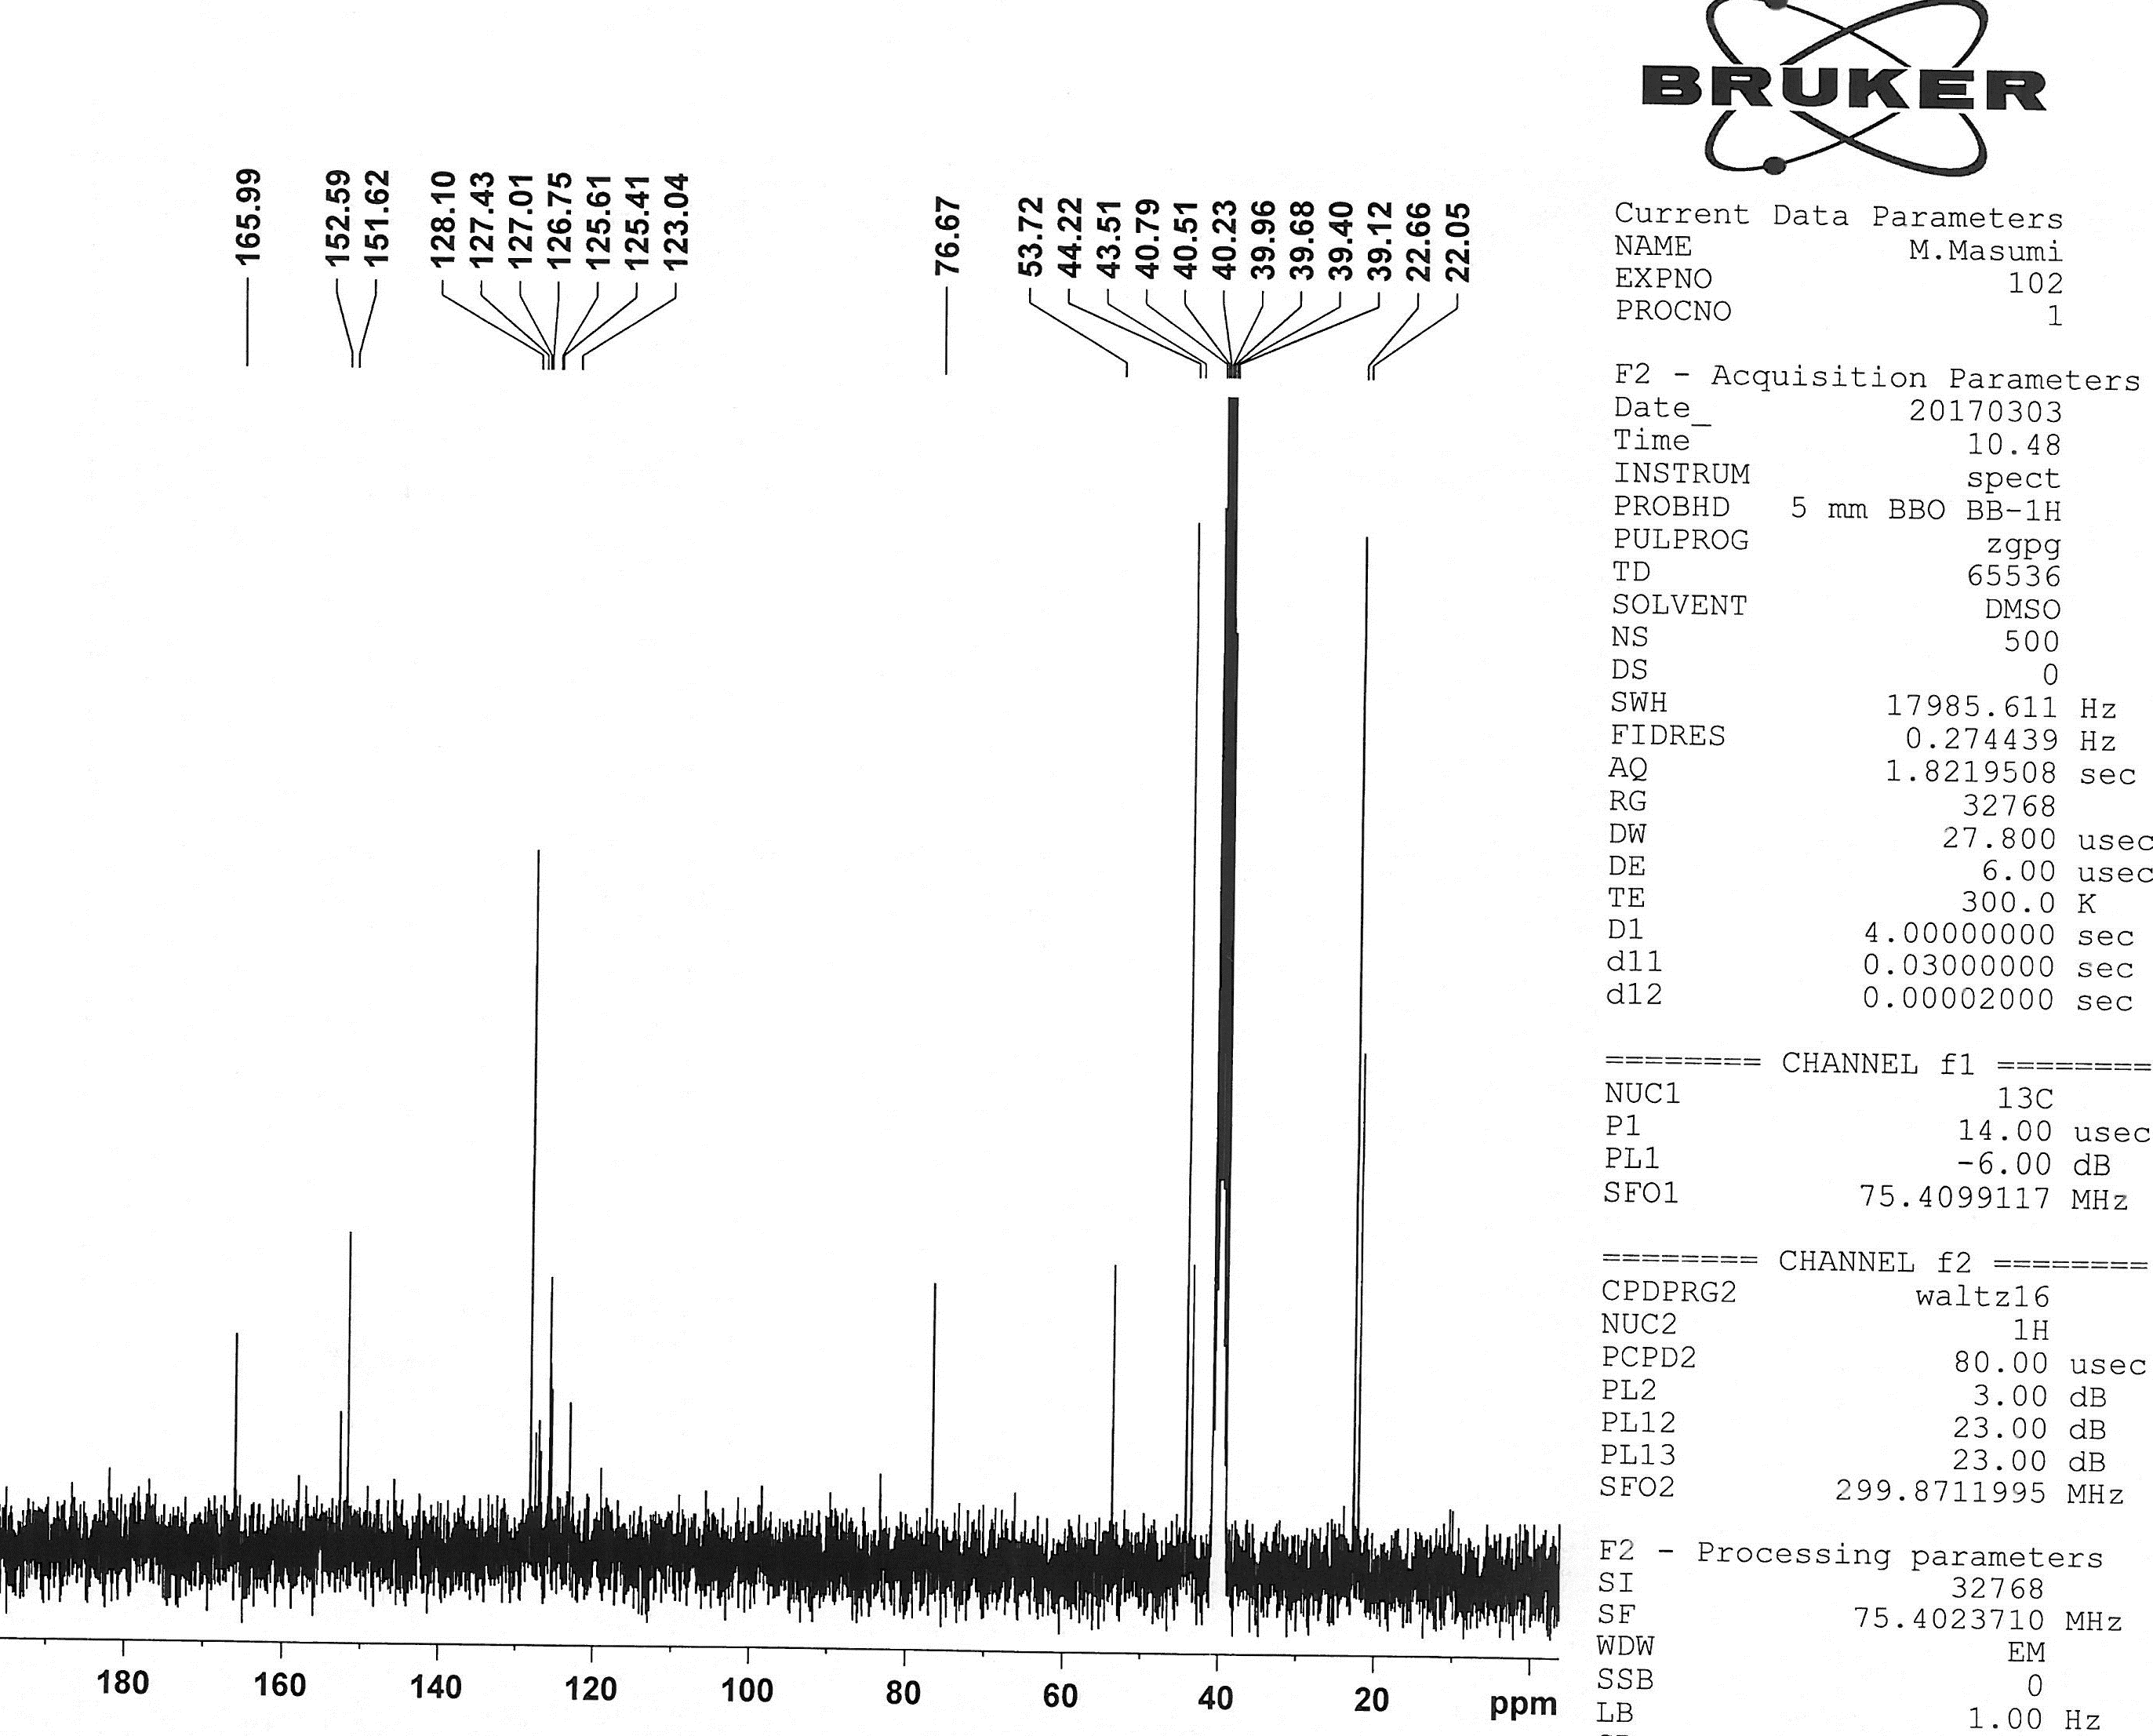


**13C NMR of 4h**


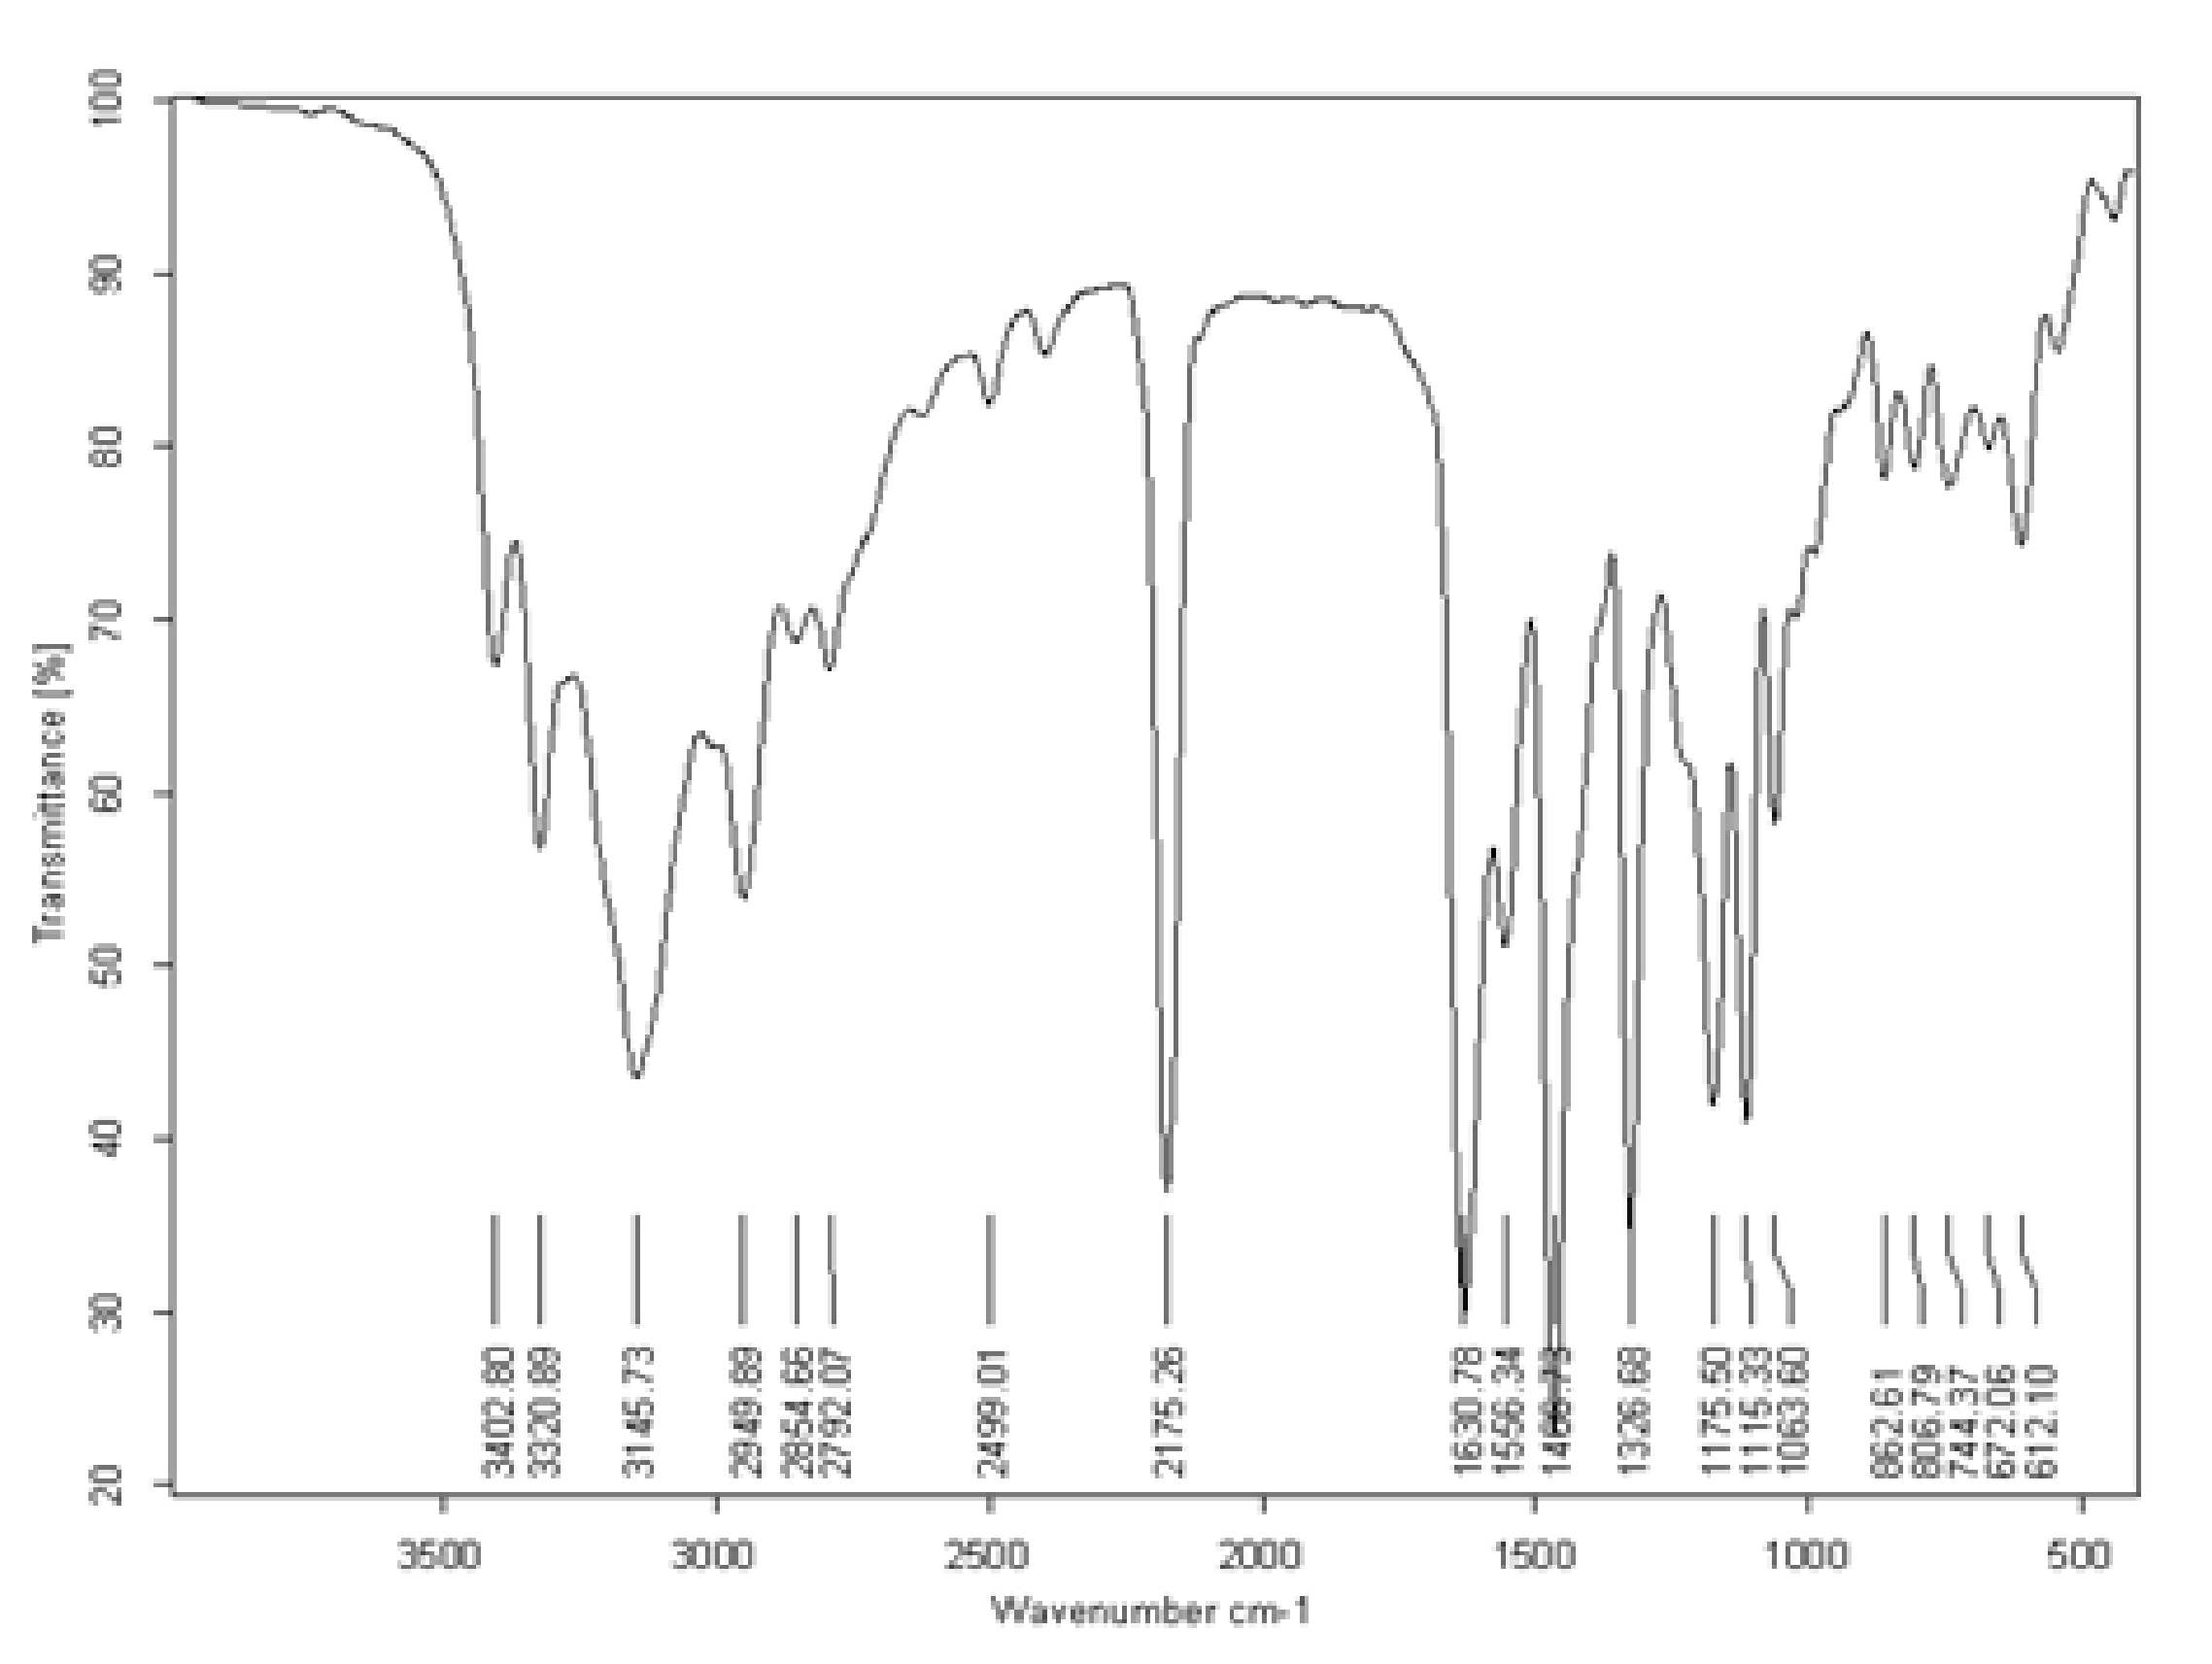


**IR of 4h**


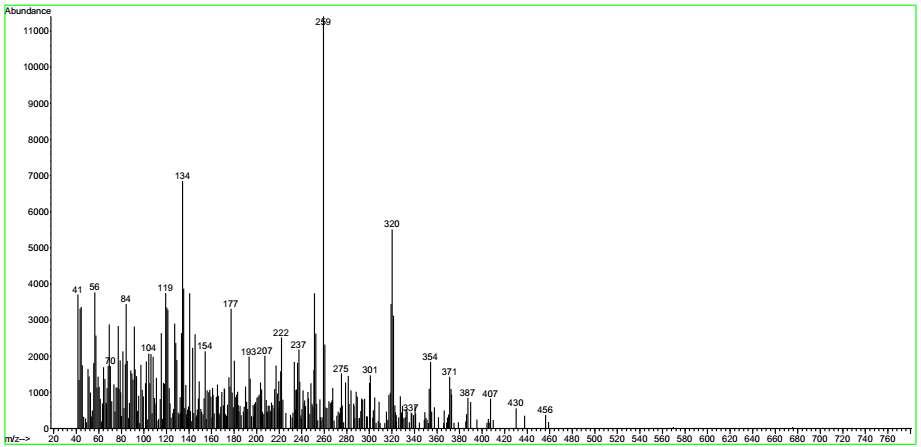


**Mass of 4h**


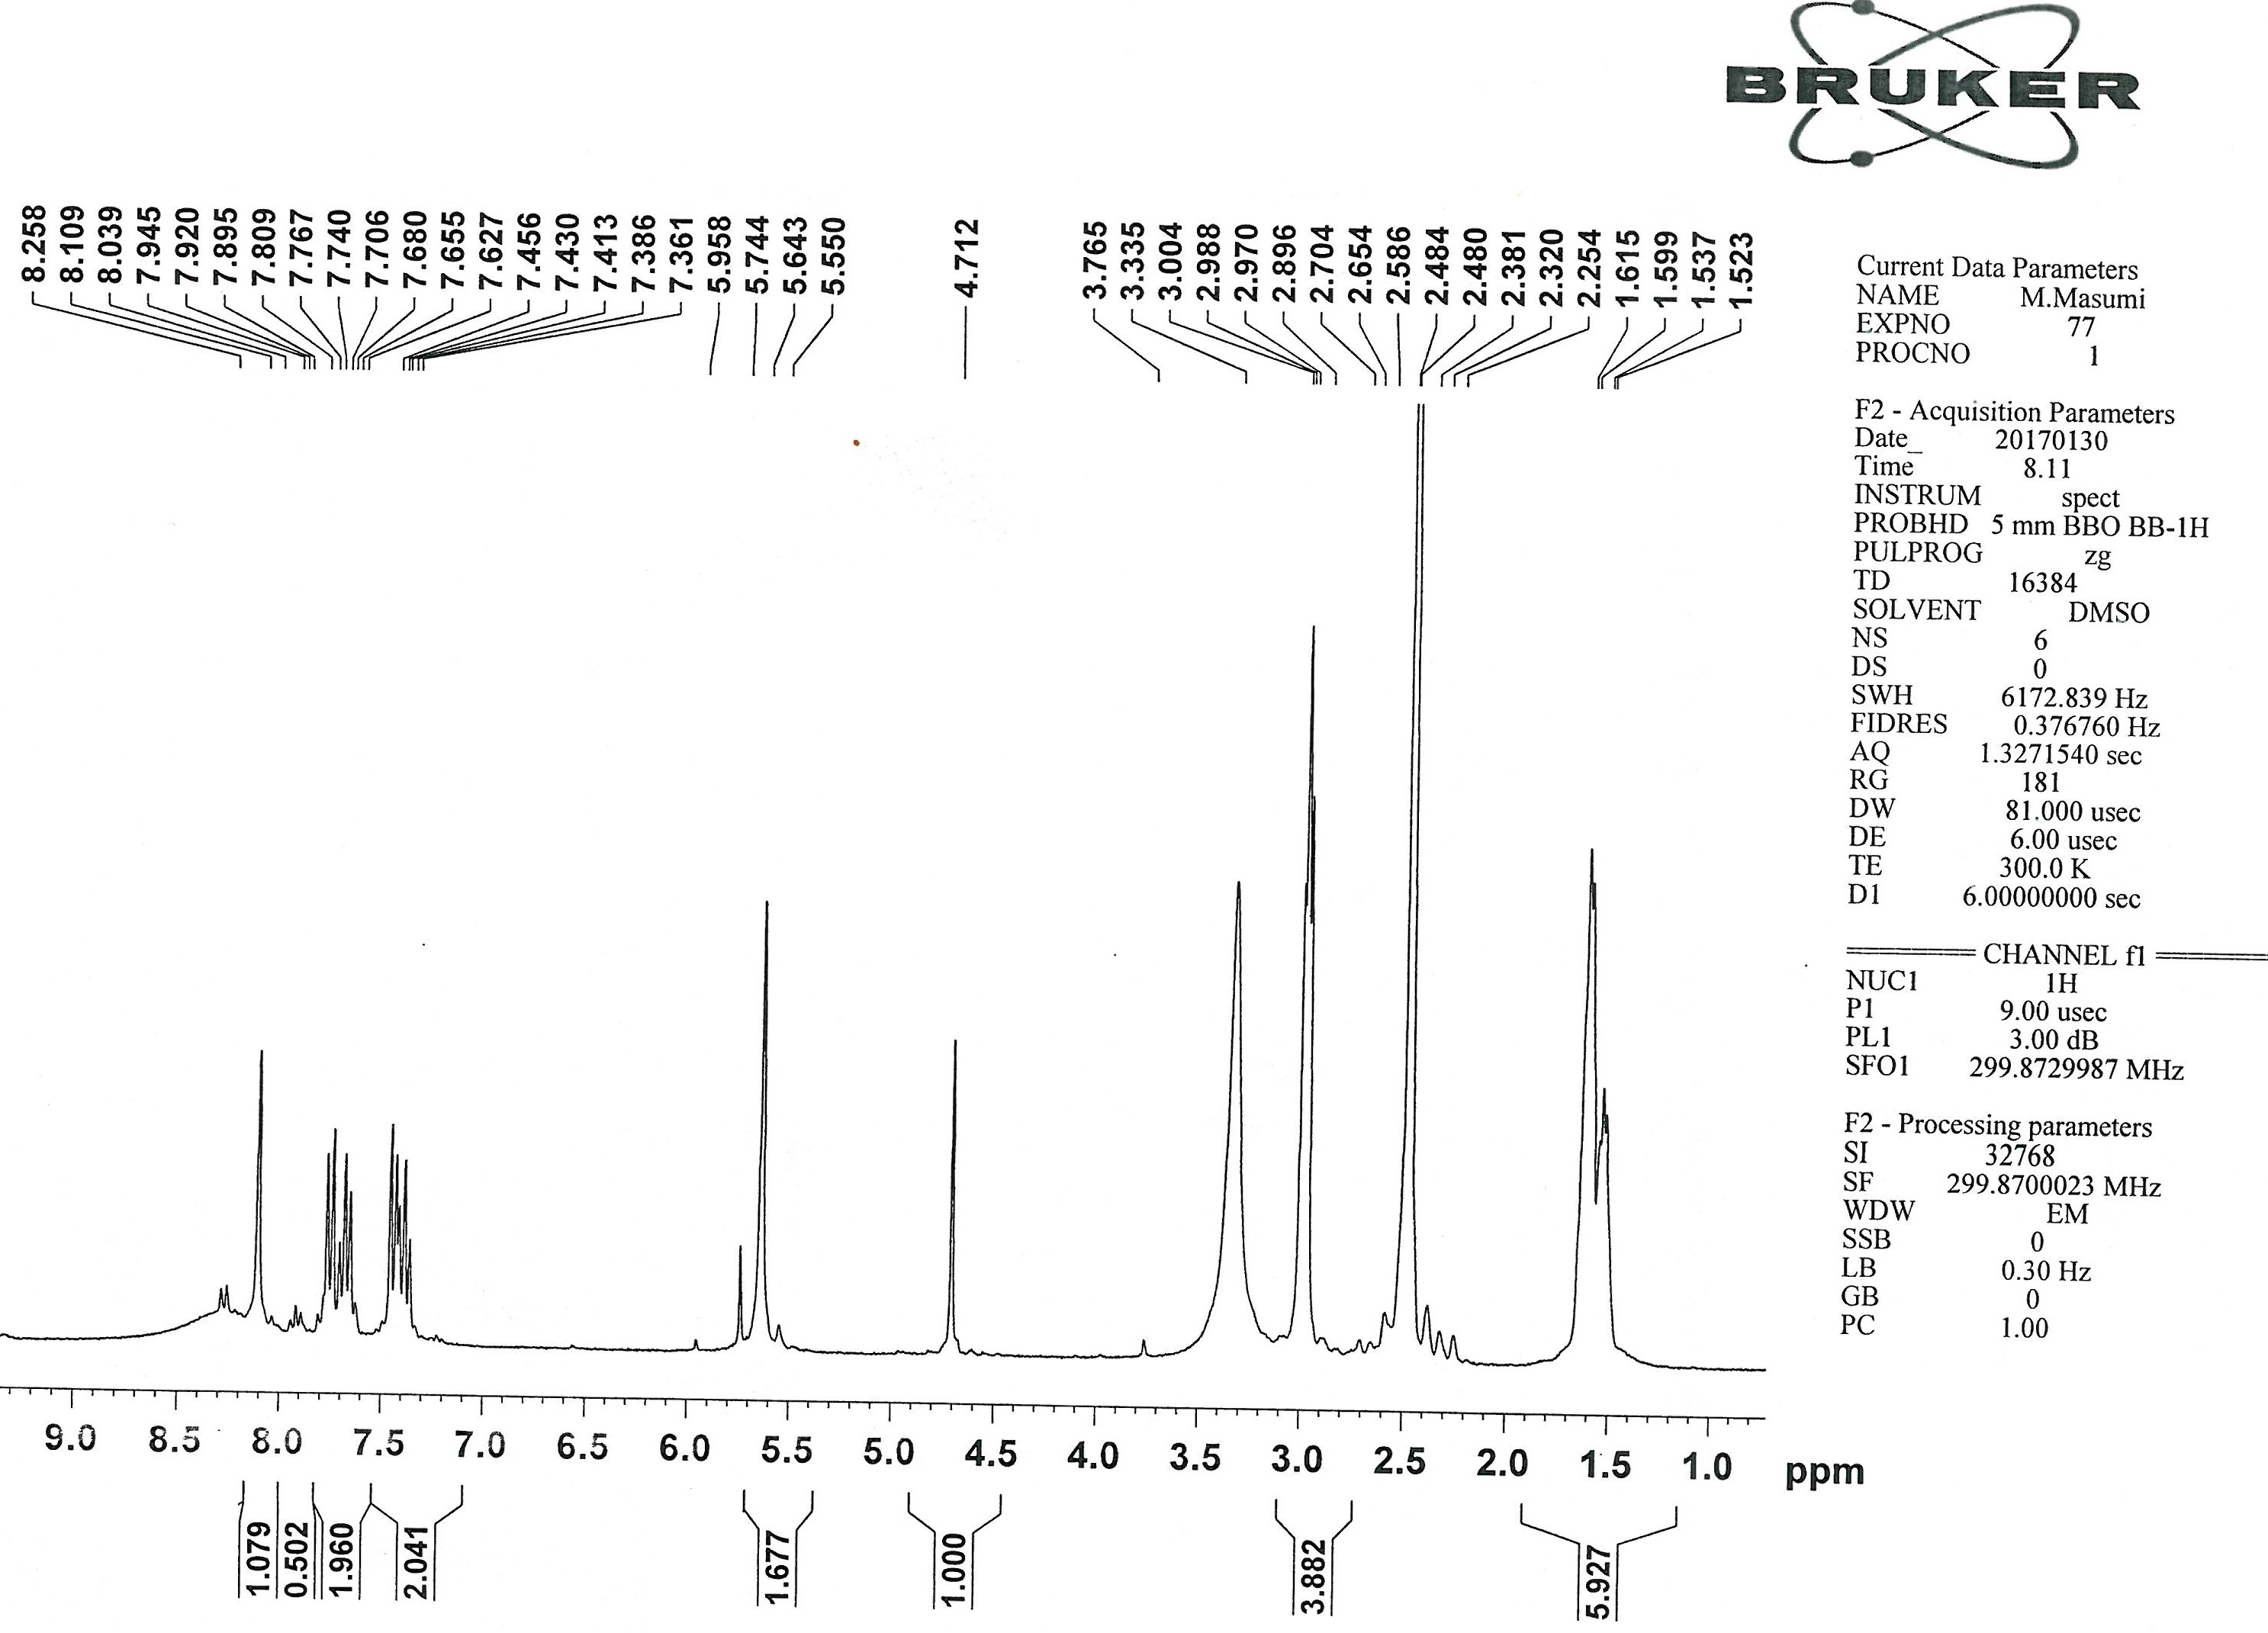


**1H NMR of 4i**


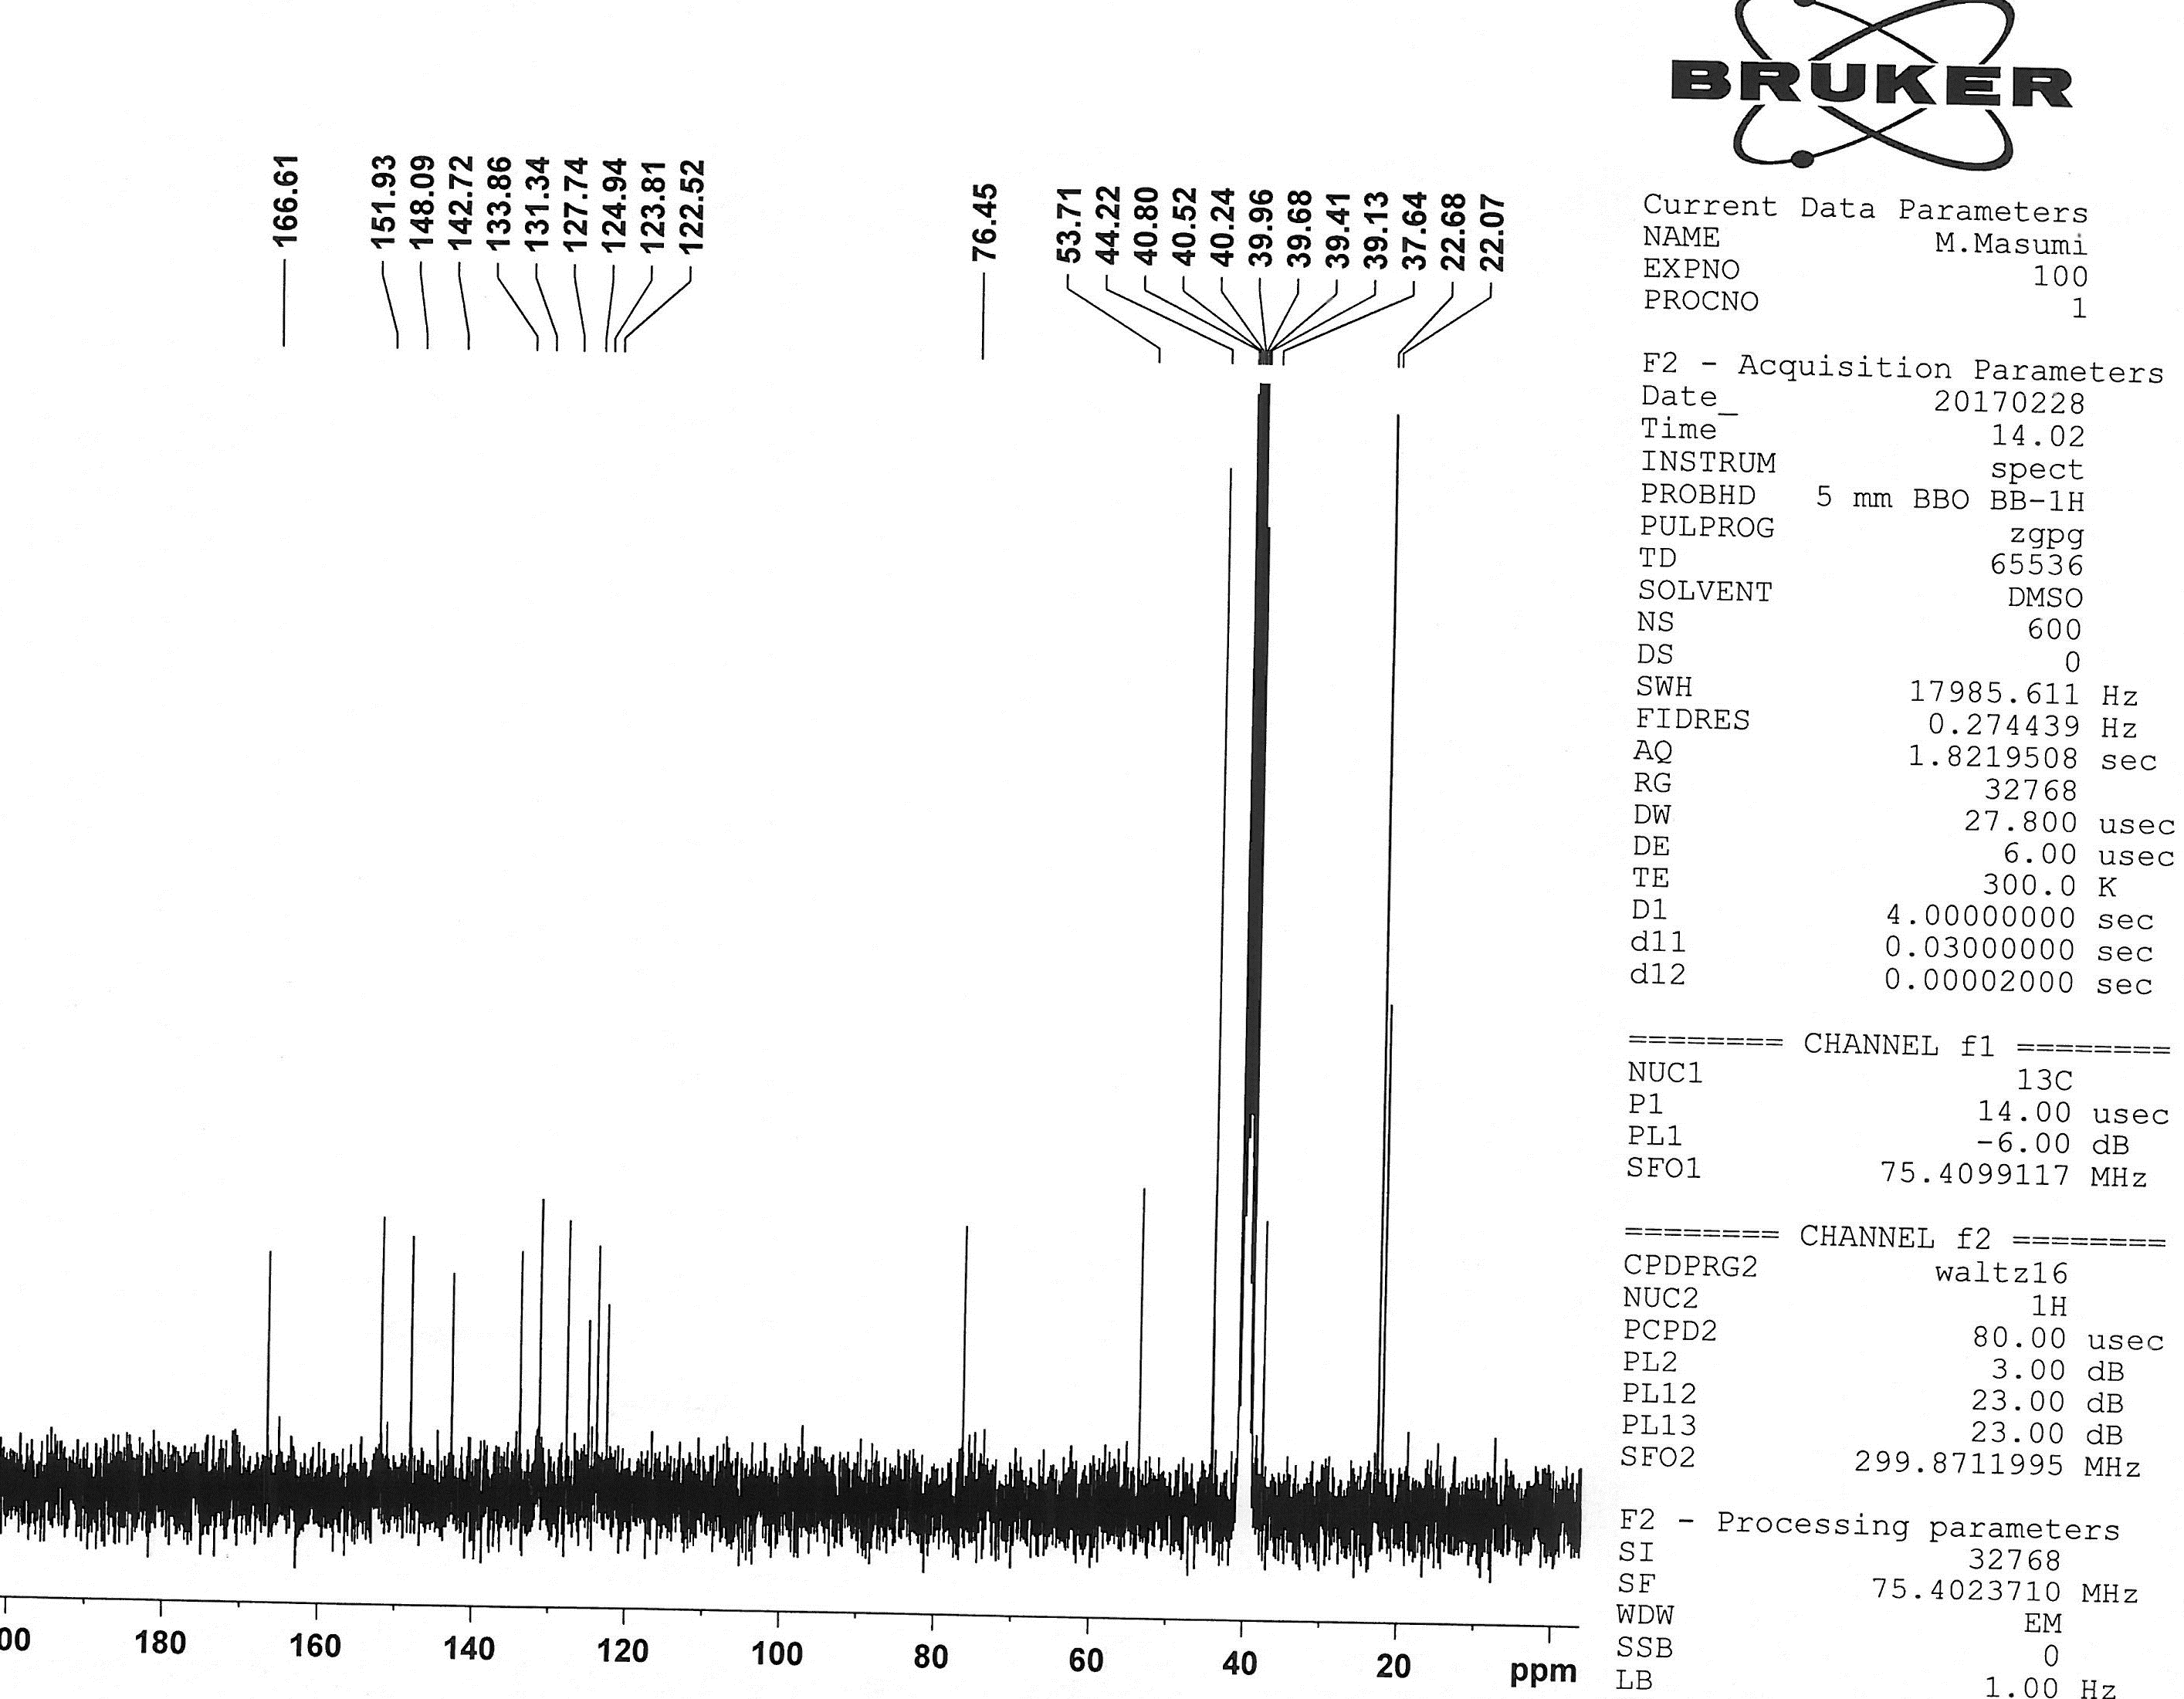


**13C NMR of 4i**


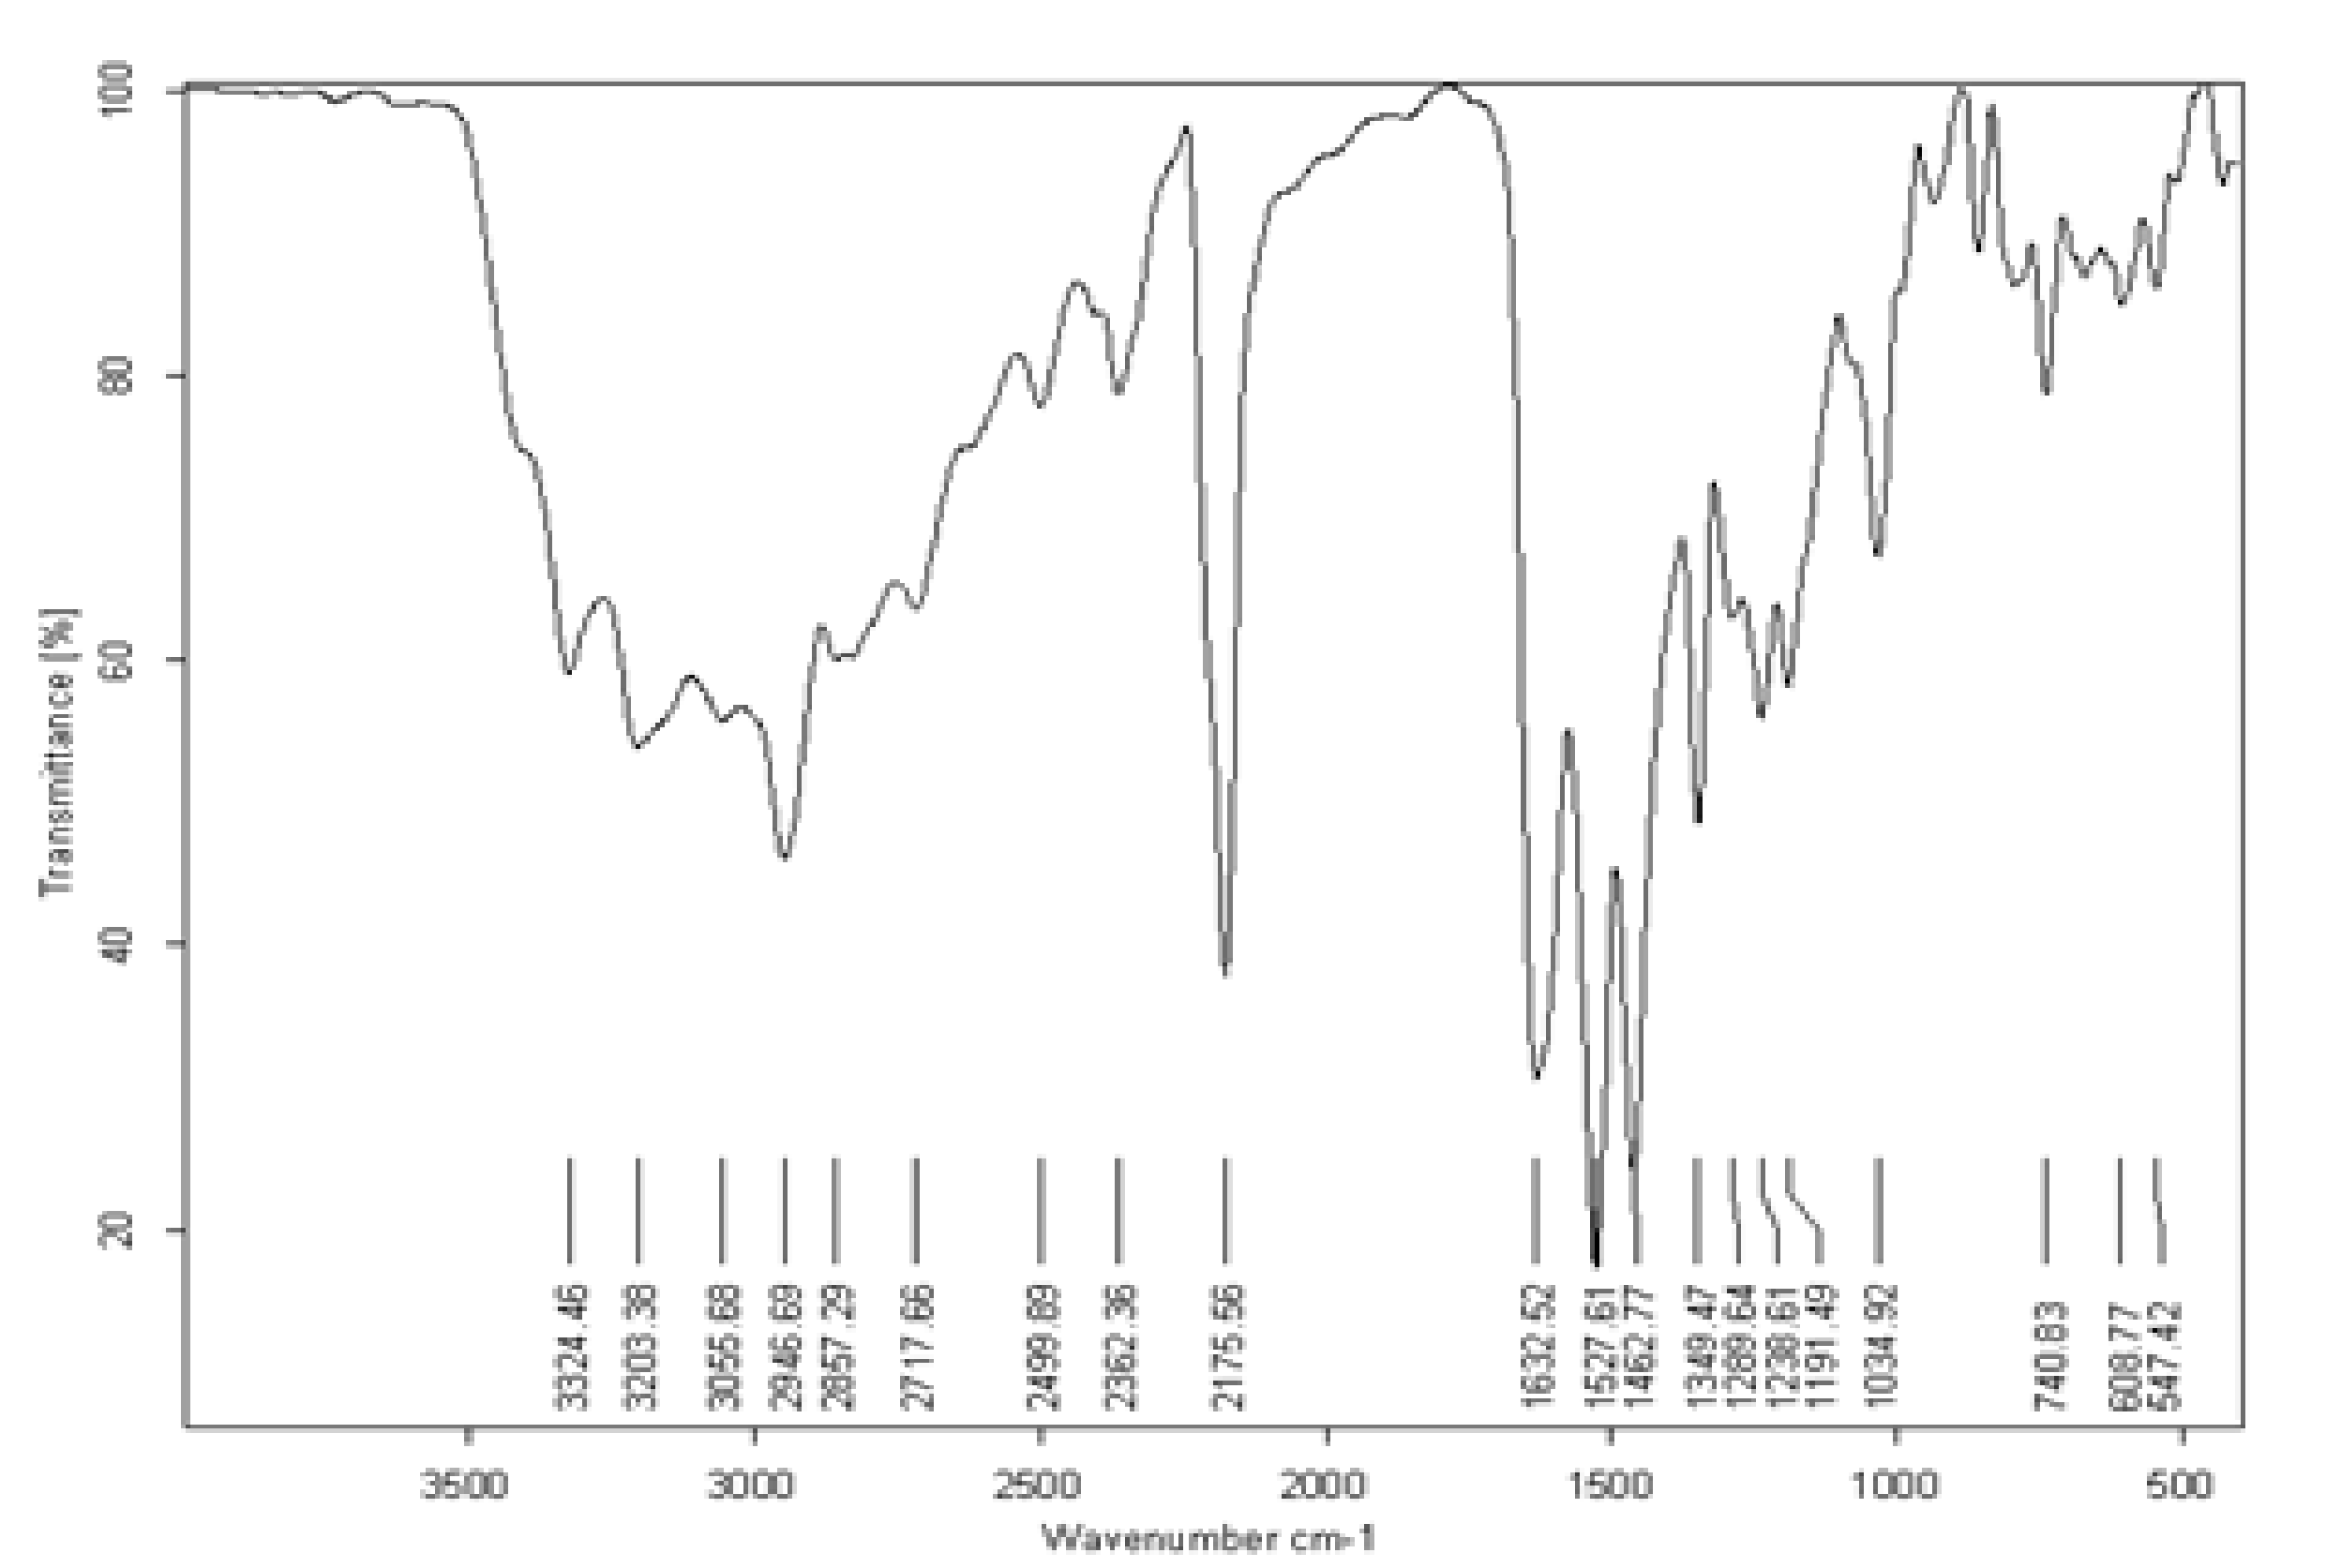


**IR of 4i**


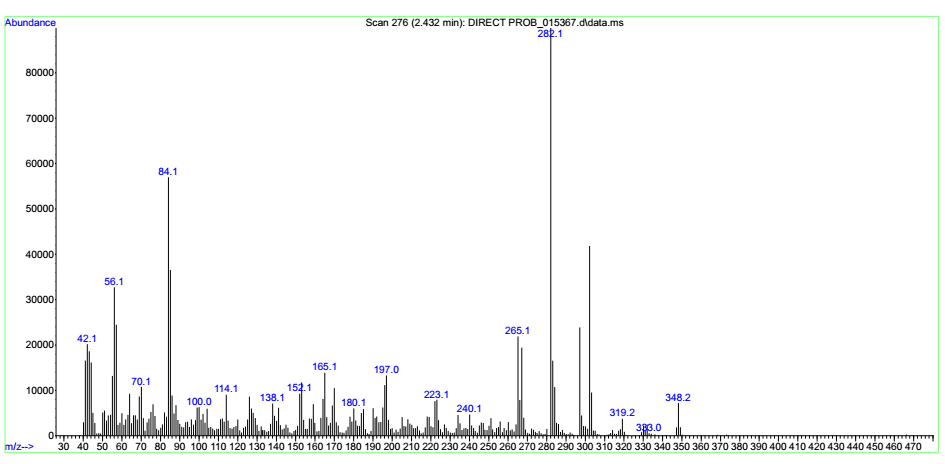


**Mass of 4i**


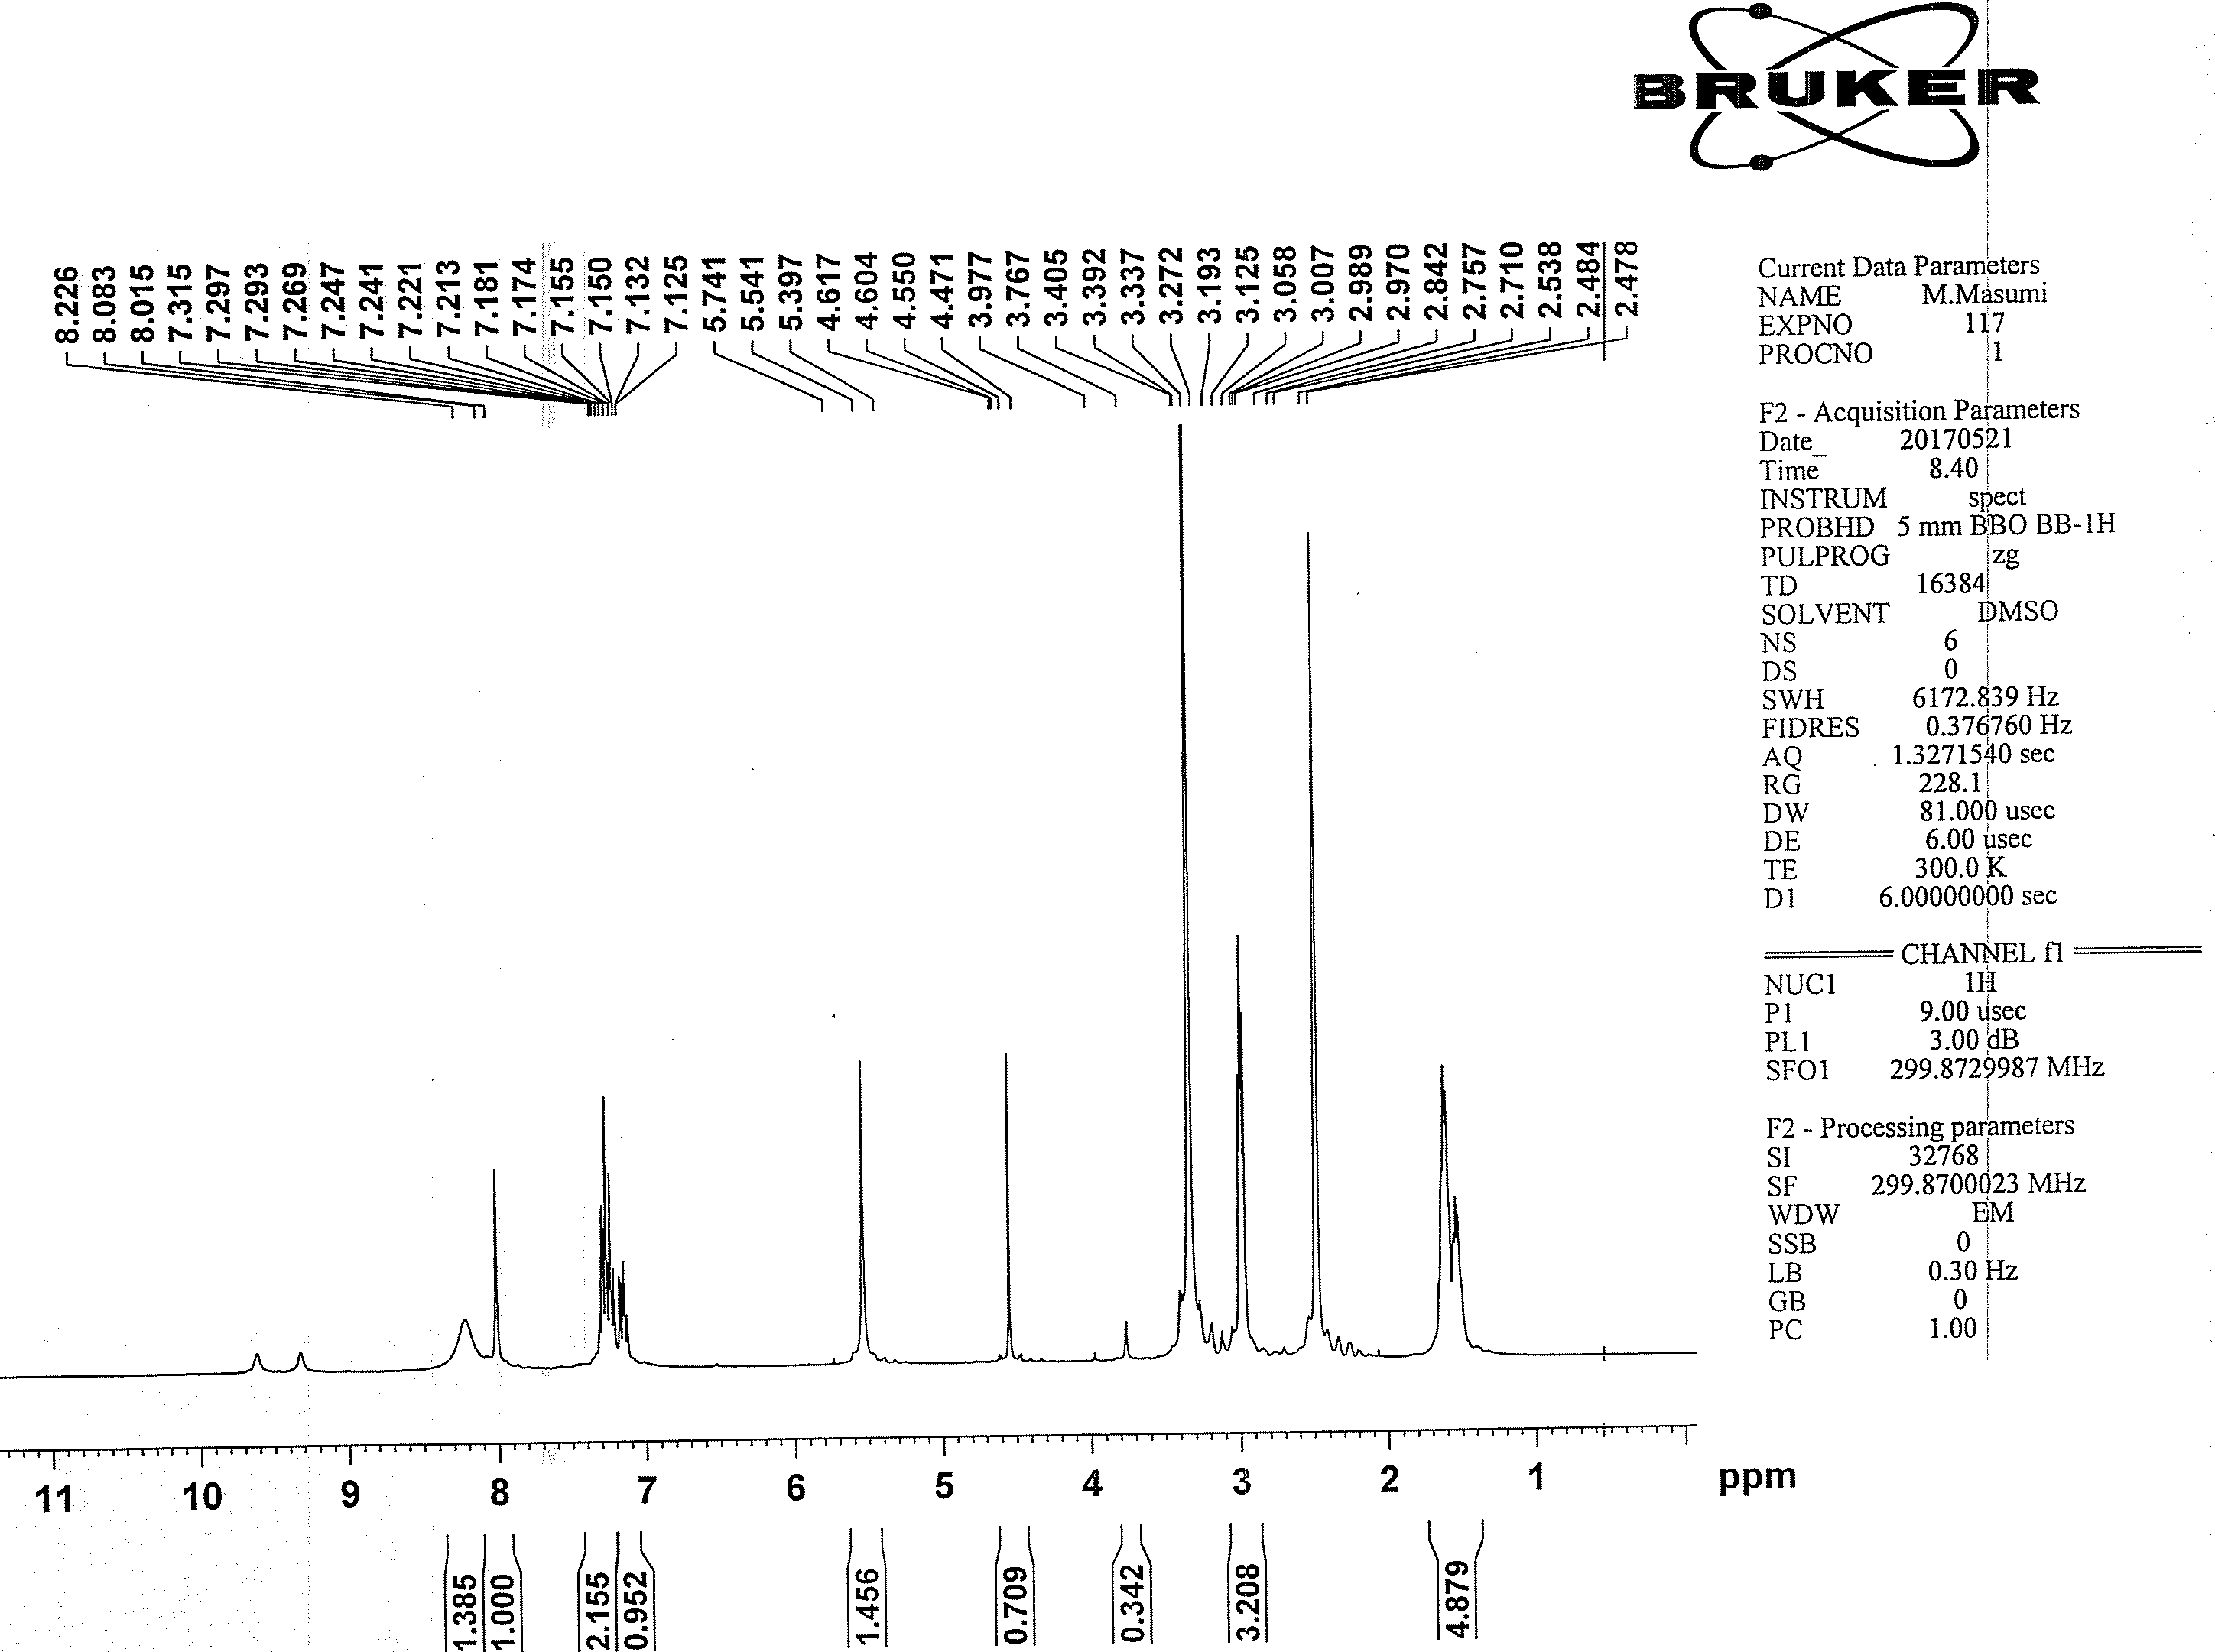


**1H NMR of 4j**


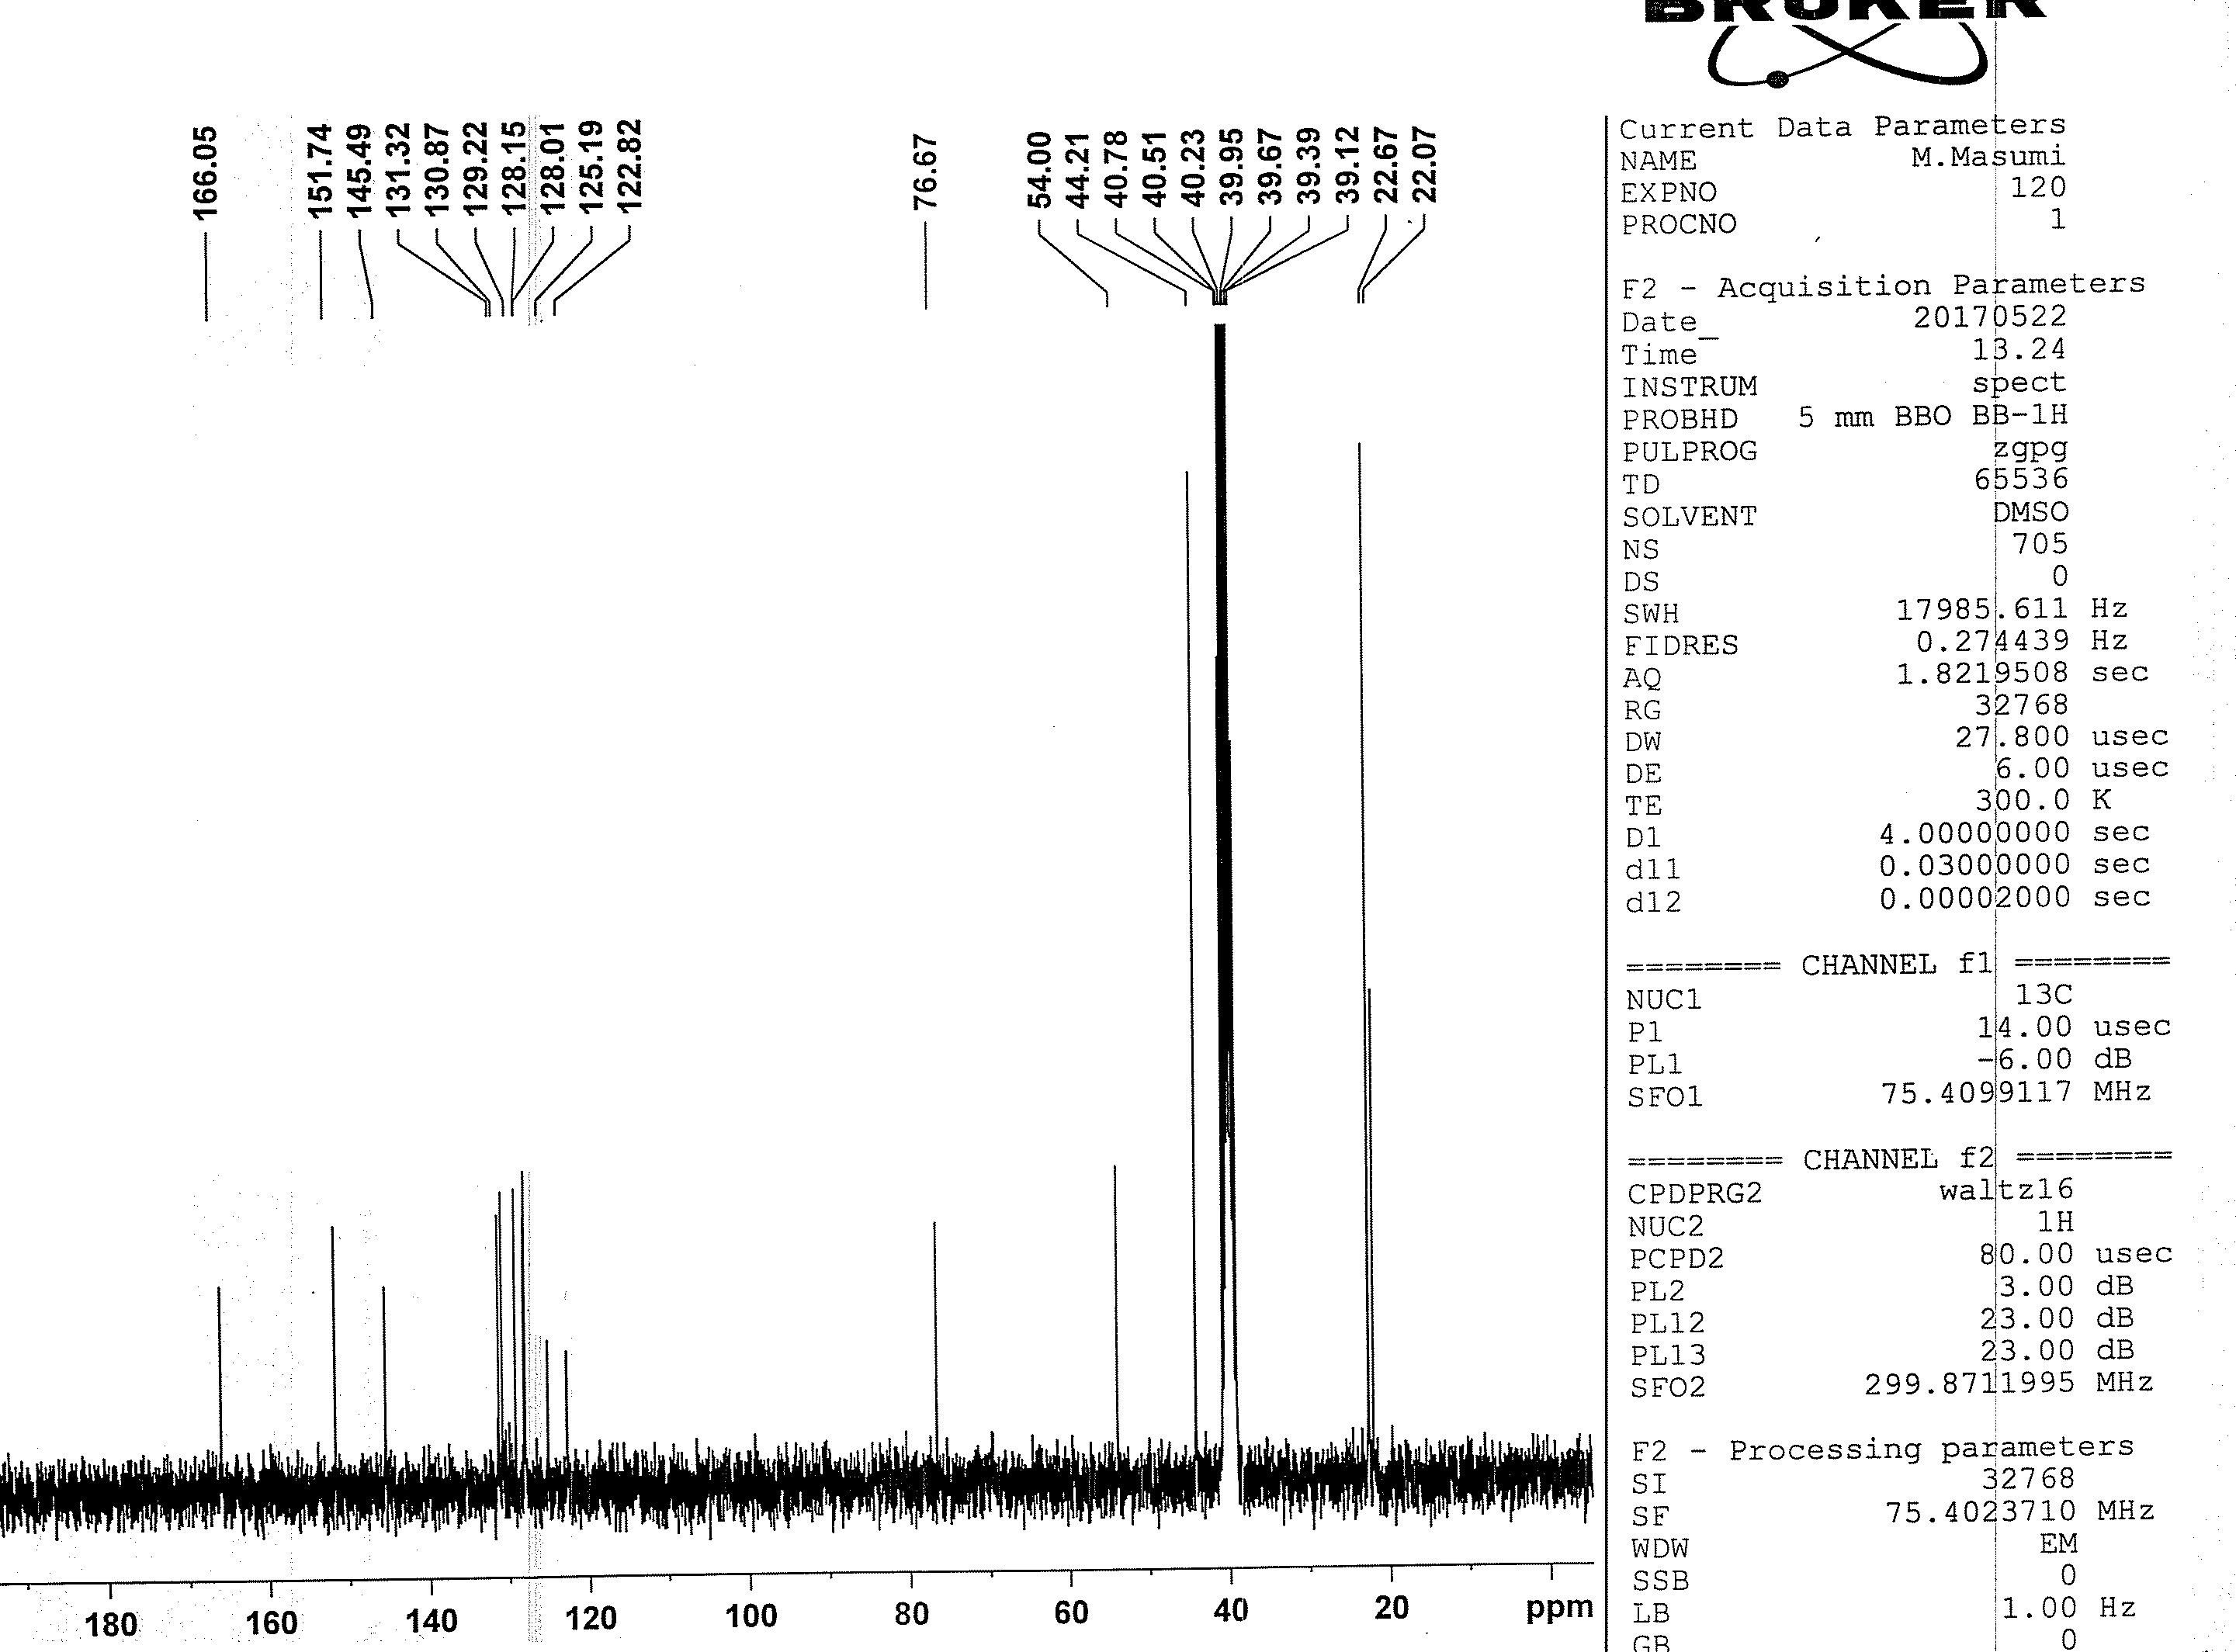


**13C NMR of 4j**


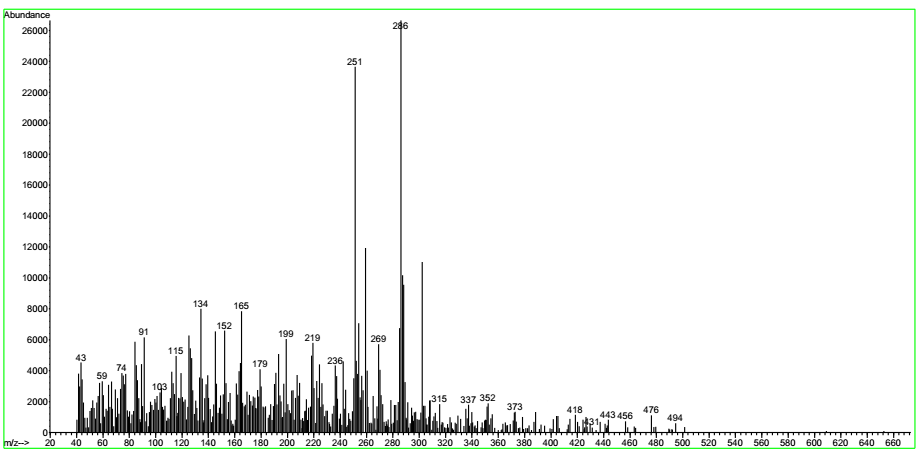


**Mass of 4j**
